# Supplementary material for: Functional Screening of Antibiotic Resistance Genes from a Representative Metagenomic Library of Food Fermenting Microbiota
Source: Hindawi journal article supplement (doi:10.1155/2014/290967), 2014-01-01
Supplement: f1 [file 290967.f1.pdf]

**Ampl Contig 1**

LOCUS 1A\_1

DEFINITION

FEATURES

gene

Location/Qualifiers

complement(181..2049)

/rbs\_motif="AGGA"

/uscore="-0.74"

/rscore="7.92"

/sscore="10.91"

/locus\_tag="1A\_01"

/conf="99.99"

/ID="1A\_01"

/cscore="380.2"

/partial=0

/tscore="3.07"

/gc\_cont="0.418"

/rbs\_spacer="5-10bp"

/start\_type="ATG"

/score=391.1

/codon\_start=1

CDS

complement(181..2049)

/rbs\_motif="AGGA"

/uscore="-0.74"

/rscore="7.92"

/sscore="10.91"

/locus\_tag="1A\_01"

/conf="99.99"

/ID="1A\_01"

/cscore="380.2"

/partial=0

/tscore="3.07"

/gc\_cont="0.418"

/rbs\_spacer="5-10bp"

/product="phosphoribosylformylglycinamidine synthase"

/start\_type="ATG"

/score=391.1

/codon\_start=1

gene

complement(2105..2812)

/rbs\_motif="GGA/GAG/AGG"

/uscore="4.23"

/rscore="-1.46"

/sscore="5.18"

/locus\_tag="1A\_02"

/conf="100.0"

/ID="1A\_02"

/cscore="123.87"

/partial=0

/tscore="3.07"

/gc\_cont="0.381"

/rbs\_spacer="11-12bp"

/start\_type="ATG"

/score=129.1

/codon\_start=1

CDS

complement(2105..2812)

/rbs\_motif="GGA/GAG/AGG"

/uscore="4.23"

/rscore="-1.46"

/sscore="5.18"

/locus\_tag="1A\_02"

/conf="100.0"

/ID="1A\_02"

```

/cscore="123.87"
/partial=0
/tscore="3.07"
/gc_cont="0.381"
/rbs_spacer="11-12bp"
/product="phosphoribosylaminoimidazole-succinocarboxamide
synthase"
/start_type="ATG"
/score=129.1
/codon_start=1
gene complement(3097..3342)
/rbs_motif="GGAGG"
/uscore="0.41"
/rscore="14.07"
/sscore="18.75"
/locus_tag="1A_03"
/conf="100.0"
/ID="1A_03"
/cscore="24.57"
/partial=0
/tscore="2.98"
/gc_cont="0.333"
/rbs_spacer="5-10bp"
/start_type="ATG"
/score=43.3
/codon_start=1
CDS complement(3097..3342)
/rbs_motif="GGAGG"
/uscore="0.41"
/rscore="14.07"
/sscore="18.75"
/locus_tag="1A_03"
/conf="100.0"
/ID="1A_03"
/cscore="24.57"
/partial=0
/tscore="2.98"
/gc_cont="0.333"
/rbs_spacer="5-10bp"
/product="acyl carrier protein"
/start_type="ATG"
/score=43.3
/codon_start=1
gene complement(3342..4346)
/rbs_motif="None"
/uscore="4.68"
/rscore="-3.27"
/sscore="4.48"
/locus_tag="1A_04"
/conf="100.0"
/ID="1A_04"
/cscore="145.95"
/partial=0
/tscore="3.07"
/gc_cont="0.428"
/rbs_spacer="None"
/start_type="ATG"
/score=150.4
/codon_start=1
CDS complement(3342..4346)
/rbs_motif="None"

```

```

/uscure="4.68"
/rscure="-3.27"
/sscore="4.48"
/locus_tag="1A_04"
/conf="100.0"
/ID="1A_04"
/cscore="145.95"
/partial=0
/tscure="3.07"
/gc_cont="0.428"
/rbs_spacer="None"
/product="phosphate acyltransferase"
/start_type="ATG"
/score=150.4
/codon_start=1
gene complement(4562..5335)
/rbs_motif="GGA/GAG/AGG"
/uscure="-2.22"
/rscure="0.91"
/sscore="2.94"
/locus_tag="1A_05"
/conf="100.0"
/ID="1A_05"
/cscore="90.82"
/partial=0
/tscure="3.07"
/gc_cont="0.354"
/rbs_spacer="5-10bp"
/start_type="ATG"
/score=93.8
CDS /codon_start=1
complement(4562..5335)
/rbs_motif="GGA/GAG/AGG"
/uscure="-2.22"
/rscure="0.91"
/sscore="2.94"
/locus_tag="1A_05"
/conf="100.0"
/ID="1A_05"
/cscore="90.82"
/partial=0
/tscure="3.07"
/gc_cont="0.354"
/rbs_spacer="5-10bp"
/product="DNA repair protein RecO"
/start_type="ATG"
/score=93.8
/codon_start=1
gene complement(5322..6446)
/rbs_motif="None"
/uscure="0.03"
/rscure="-3.27"
/sscore="-0.17"
/locus_tag="1A_06"
/conf="100.0"
/ID="1A_06"
/cscore="98.61"
/partial=0
/tscure="3.07"
/gc_cont="0.373"
/rbs_spacer="None"

```

|      |                                                                                                                                                                                                                                                                                                                                                                                                                                                                                                                                                                                                                                                                                                                                                                                                                                                                                                                                                                                                                                                                                                                                                                                                                              |
|------|------------------------------------------------------------------------------------------------------------------------------------------------------------------------------------------------------------------------------------------------------------------------------------------------------------------------------------------------------------------------------------------------------------------------------------------------------------------------------------------------------------------------------------------------------------------------------------------------------------------------------------------------------------------------------------------------------------------------------------------------------------------------------------------------------------------------------------------------------------------------------------------------------------------------------------------------------------------------------------------------------------------------------------------------------------------------------------------------------------------------------------------------------------------------------------------------------------------------------|
|      | /start_type="ATG"<br>/score=98.4<br>/codon_start=1<br>complement(5322..6446)<br>/rbs_motif="None"<br>/uscore="0.03"<br>/rscore="-3.27"<br>/sscore="-0.17"<br>/locus_tag="1A_06"<br>/conf="100.0"<br>/ID="1A_06"<br>/cscore="98.61"<br>/partial=0<br>/tscore="3.07"<br>/gc_cont="0.373"<br>/rbs_spacer="None"<br>/product="aminotransferase A"<br>/start_type="ATG"<br>/score=98.4<br>/codon_start=1<br>complement(7411..7578)<br>/rbs_motif="None"<br>/uscore="-2.35"<br>/rscore="-4.95"<br>/sscore="-3.98"<br>/locus_tag="1A_07"<br>/conf="78.86"<br>/ID="1A_07"<br>/cscore="9.71"<br>/partial=0<br>/tscore="-5.27"<br>/gc_cont="0.357"<br>/rbs_spacer="None"<br>/start_type="GTG"<br>/score=5.7<br>/codon_start=1<br>complement(7411..7578)<br>/rbs_motif="None"<br>/uscore="-2.35"<br>/rscore="-4.95"<br>/sscore="-3.98"<br>/locus_tag="1A_07"<br>/conf="78.86"<br>/ID="1A_07"<br>/cscore="9.71"<br>/partial=0<br>/tscore="-5.27"<br>/gc_cont="0.357"<br>/rbs_spacer="None"<br>/product="CpsL protein"<br>/start_type="GTG"<br>/score=5.7<br>/codon_start=1<br>complement(7578..8402)<br>/rbs_motif="None"<br>/uscore="-1.49"<br>/rscore="-4.86"<br>/sscore="-11.77"<br>/locus_tag="1A_08"<br>/conf="50.0"<br>/ID="1A_08" |
| CDS  |                                                                                                                                                                                                                                                                                                                                                                                                                                                                                                                                                                                                                                                                                                                                                                                                                                                                                                                                                                                                                                                                                                                                                                                                                              |
| gene |                                                                                                                                                                                                                                                                                                                                                                                                                                                                                                                                                                                                                                                                                                                                                                                                                                                                                                                                                                                                                                                                                                                                                                                                                              |
| CDS  |                                                                                                                                                                                                                                                                                                                                                                                                                                                                                                                                                                                                                                                                                                                                                                                                                                                                                                                                                                                                                                                                                                                                                                                                                              |
| gene |                                                                                                                                                                                                                                                                                                                                                                                                                                                                                                                                                                                                                                                                                                                                                                                                                                                                                                                                                                                                                                                                                                                                                                                                                              |

|      |                                                                                                                                                                                                                                                                                                                                                                                                                                                       |
|------|-------------------------------------------------------------------------------------------------------------------------------------------------------------------------------------------------------------------------------------------------------------------------------------------------------------------------------------------------------------------------------------------------------------------------------------------------------|
|      | <pre> /cscore="11.42" /partial=0 /tscore="-5.42" /gc_cont="0.333" /rbs_spacer="None" /start_type="TTG" /score=-0.4 /codon_start=1 complement(7578..8402) /rbs_motif="None" /uscore="-1.49" /rscore="-4.86" /sscore="-11.77" /locus_tag="1A_08" /conf="50.0" /ID="1A_08" /cscore="11.42" /partial=0 /tscore="-5.42" /gc_cont="0.333" /rbs_spacer="None" /product="DNA polymerase III subunit beta" /start_type="TTG" /score=-0.4 /codon_start=1 </pre> |
| CDS  |                                                                                                                                                                                                                                                                                                                                                                                                                                                       |
|      | <pre> complement(8557..9750) /rbs_motif="GGA/GAG/AGG" /uscore="1.54" /rscore="0.91" /sscore="4.86" /locus_tag="1A_09" /conf="99.99" /ID="1A_09" /cscore="175.61" /partial=0 /tscore="3.07" /gc_cont="0.371" /rbs_spacer="5-10bp" /start_type="ATG" /score=180.5 /codon_start=1 </pre>                                                                                                                                                                 |
| gene |                                                                                                                                                                                                                                                                                                                                                                                                                                                       |
|      | <pre> complement(8557..9750) /rbs_motif="GGA/GAG/AGG" /uscore="1.54" /rscore="0.91" /sscore="4.86" /locus_tag="1A_09" /conf="99.99" /ID="1A_09" /cscore="175.61" /partial=0 /tscore="3.07" /gc_cont="0.371" /rbs_spacer="5-10bp" /product="chromosomal replication initiation protein DnaA" /start_type="ATG" /score=180.5 /codon_start=1 </pre>                                                                                                      |
| CDS  |                                                                                                                                                                                                                                                                                                                                                                                                                                                       |
|      | <pre> complement(10266..10934) /rbs_motif="AGGA" /uscore="0.6" </pre>                                                                                                                                                                                                                                                                                                                                                                                 |
| gene |                                                                                                                                                                                                                                                                                                                                                                                                                                                       |

|      |                                                                                                                                                                                                                                                                                                                                                                                                                                                                                                                                      |
|------|--------------------------------------------------------------------------------------------------------------------------------------------------------------------------------------------------------------------------------------------------------------------------------------------------------------------------------------------------------------------------------------------------------------------------------------------------------------------------------------------------------------------------------------|
|      | <pre> /rscore="7.92" /sscore="11.58" /locus_tag="1A_10" /conf="100.0" /ID="1A_10" /cscore="64.37" /partial=0 /tscore="3.07" /gc_cont="0.359" /rbs_spacer="5-10bp" /start_type="ATG" /score=75.9 /codon_start=1 complement(10266..10934) /rbs_motif="AGGA" /uscore="0.6" /rscore="7.92" /sscore="11.58" /locus_tag="1A_10" /conf="100.0" /ID="1A_10" /cscore="64.37" /partial=0 /tscore="3.07" /gc_cont="0.359" /rbs_spacer="5-10bp" /product="plasmid partitioning protein ParB" /start_type="ATG" /score=75.9 /codon_start=1 </pre> |
| CDS  |                                                                                                                                                                                                                                                                                                                                                                                                                                                                                                                                      |
|      | <pre> complement(11001..11588) /rbs_motif="None" /uscore="0.0" /rscore="0.0" /sscore="3.22" /locus_tag="1A_11" /conf="100.0" /ID="1A_11" /cscore="77.81" /partial=1 /tscore="3.22" /gc_cont="0.389" /rbs_spacer="None" /start_type="Edge" /score=81.0 /codon_start=1 </pre>                                                                                                                                                                                                                                                          |
| gene |                                                                                                                                                                                                                                                                                                                                                                                                                                                                                                                                      |
|      | <pre> complement(11001..11588) /rbs_motif="None" /uscore="0.0" /rscore="0.0" /sscore="3.22" /locus_tag="1A_11" /conf="100.0" /ID="1A_11" /cscore="77.81" /partial=1 /tscore="3.22" /gc_cont="0.389" /rbs_spacer="None" /product="Serine endopeptidase, partial" /start_type="Edge" </pre>                                                                                                                                                                                                                                            |
| CDS  |                                                                                                                                                                                                                                                                                                                                                                                                                                                                                                                                      |

/score=81.0  
/codon\_start=1

BASE COUNT 3562 a 2430 c 1949 g 3648 t

ORIGIN

```
1 aatatccccg tggataagtg gataacccca agggaaagttt tttcaggcat cgtgtgtaag
61 cagaatatat aagtgtctgtt ccctgggtgct tcctcgtcctc ctcgagggtt cgcctgtcgc
121 ctcgactgcg gcgagtcacg acgttgtaaa acgacggcca gtgaattgta atacgactca
181 ctatagggcg aattcgagct cggtagcccg ggatcccaca cgcacacccat ttgtatcaag
241 gaaacgacgt tccaaatcaa caattgtttt accattccag tgcattgacga gatttggttt
301 ttcagtcacg gttgcaacga caactgcctc aatattttct ttgttacatt cagcaacgaa
361 gatattctaca tcttctggac gaaccaccac agccatacgt tcttgagatt cagagatggc
421 aatttcggta ccgttcaaac cttggtattt caatggcact ttgtctagat caatttcaag
481 accatctgcc aattcaccga tagccacaca gacaccacca gcaccaaagt cattggattt
541 cttgataaga cgtgttactt caccattgctg gaaaagacgt tgaattctac gttcttcgat
601 agcattacct ttttgaacct cagcaccagc tgtttcaact gattcaaccg tttgaacttt
661 tgaagaacct gtcgcaccac cgataccgtc gcgtccagtc ttaccaccga gcaagataac
721 cacatctcca gcttcagggt tttcacggac aacattctcc ttaggagctg caccgataac
781 tgcaccctagc tccatacgtt tggcaacgaa acctgggtgg aagtattcac gaacataagt
841 tgttgcaaga ccaatttggg taccatatga agaataacca tgagccgctt ttttagaaat
901 gacttggtgt ggcaattttt cagcacgtgt ttcagcgtat ggtgttgtaa tatcaccggc
961 acctgaaata cgcatacgtt ggtaaacgta tgaacgacct gacaatgggt cacgaatggc
1021 accaccgata caagtagccg ctccacaaaa tgggttcgatt tccgttgggt ggttatgagt
1081 ttcgttcttg aacataagaa gccatggttc tttgacacca ttgacatcta cttcaatttc
1141 aactgagcag gcattgattt cgtcagaaac ttccatgtca tccaaacggc cattggcacg
1201 ctcataacga ccaaaaatag tcgccatatc cattaagggt tgaggctttt ctgcacgtcc
1261 caactcatca cgcattggca tatatttgtc ataagttgct tgcaattggt tttggaattt
1321 agaagctgag aagtcgatgt ttttcaactc agtctcgaaa gttgtgtggc ggcagtggtc
1381 agaccagtaa gtatccaaaa ccttaagttc agtctcagtt ggcacacgtc caattgactt
1441 gaagtaatct tgaatgaaga gcaggtcctc cacttccatg gccaatcctt gatctgcctt
1501 atactgtgca aaatcttctg ctgtataagt ttcaaagaaa tccaagtttg gaatcgtttt
1561 gtcagactca gagaaatcct gtttagcaat accaacagtg atatctttga aacgagagtc
1621 cactgggttc aatagataat ttttaacagc ttccaattca ttagcagcaa tgtccttggt
1681 aaccaagtac aattgagcag tattaaccgt tacatcactt gagctacca gcaaaagcaa
1741 agcttcttgt gaagatgctg cacgttgatc aaattgacca ggcaagcttt cgatagcaaa
1801 gaaagcatac ttctcaaggt cagtcttaac tgtagcttca tccaaaacag tatcggtcac
1861 ttgttcagaa aagatatatt tttccgcagc ggcaaacaaa tcctctgcca aattaaagac
1921 atcgtaaact tgtacaatac gaagatcatt caaggttttc aactgaatat tatgctgtaa
1981 ttcttttaat aaagagcgag atttcacacg aaaatcagct tttttctcaa cgaaaatagc
2041 tttatccatt ttatttcctt tatctatttc cactaaaaga ttgtagtgc gaccaagtaa
2101 aactttactt caatccttgc aattttttcca atacaacttc atacacatct gtcaagctac
2161 cgagatcacg acggaataca tccttatcca tatggtgccc ttccgcctcc caaagacgac
2221 agttatctgg tgaataattca tctgccaaag taatcttgcc atccttatca aaaccaactt
2281 ccaatttgaa gtcaatcaaa cgaagaccaa tttgctcaaa ccaatctttt agcaattcgt
2341 tgatacgacg tgtttcctcc ttgatataag caatttgctc atcattagca atatccaaaa
2401 acttcacatt gctcatcatt ataaatggat catccaaatc atcgtttttg tagataaaat
2461 caacaattgg agtttttcaa tccagacctt ctccacacc gaaacgtttt gagaagaac
2521 ccgcagtcac gttacgaagc acaacctcca aaggaatgat tgtaaccttc ttgttaagtt
2581 gttctgtatc agagatacgt tcgataaaat gagtagccac accgcagcgc ttcaattttt
2641 caaaaataag agacgaaatc tgattattaa gcacgccttt ccctttaatg ttctccttac
2701 gagcaccatt aagcatgggt gcctggtcct tatagaccga cttaatcaca ttttcgtctt
2761 ctgtactata aatatcttta gctttcccag tataaatcag ttggtttgac atagaatcgt
2821 tcgcctttca agtttggttca tcttaattat atcacacaaa aatccaaaaa caaacatata
2881 tcaaactttt ttgttttatt aaacaaataa cgttcggatt tttagtattg gttagagttt
2941 ttttaataaaa aagtatagaa aaaaggagtg agatagtgtt aaatcaatgt aacttttagc
3001 tttttatctc actccaataa aatgaaaaca tgcaacaaca tatagttgct tcattattat
3061 attcctctag aatctaacaa cttagagtcta gttttcttat ttgttattca attgctcaga
3121 caaatagtct aacaaatctg ataccttatc catatgatca atggtattat cagaaatctc
3181 tagggaaaac tcatcctcca aattaataat gaactccata aactctattg aatctacacc
3241 caagtcattt aatttggtag cttcgggtta aacaatgtcc tctctatcca attgctcttg
3301 aataacgagc tgcatttcct gaagaatttc tactctactc atcagttaac ctctcttttc
3361 ggggtcgaaag cgtcaactag ttgctccacc accttagtat cgagcatctt acgaacctgc
```

|      |             |             |             |             |             |             |
|------|-------------|-------------|-------------|-------------|-------------|-------------|
| 3421 | ttaatggtat  | agtagactgc  | tttagcatca  | ctagatccat  | gacattttac  | tacaggagcc  |
| 3481 | ttgagcccaa  | aaagaacagc  | tccaccggca  | cttgagtaat  | ccatcgtctc  | tttcatacct  |
| 3541 | ttaagtctat  | ccttcaatag  | gaaggcacct  | aacttagctt  | tgagaccacc  | attcattatg  |
| 3601 | gctgacttaa  | gagtcttcat  | tgtgccaa    | ccagttcctt  | caattgcctt  | agaaccgca   |
| 3661 | tttcctgtga  | aaccatcagc  | cactaccaca  | tcagcagctc  | cagacatgat  | ttcacgcgcc  |
| 3721 | tcgacattac  | caatgaagtt  | aatacttgct  | tccttggata  | aaagctcaaa  | agcctcctta  |
| 3781 | cgaagactat  | ccccctttgt  | tttctcagtc  | ccattattaa  | ggaggcctac  | acgaggggtg  |
| 3841 | gcaattccac  | gtacattttt  | agcatagaaa  | gagcctaaaa  | tagcatattg  | atgcaagtga  |
| 3901 | ttagctgtat  | tttcagcatt  | agctcctaga  | tcaagcatat  | caaaggggtg  | accagtaaaa  |
| 3961 | cttggcatcg  | ttgacataag  | acctggtctt  | tcaactccct  | taatacgtcc  | aacaacaaaa  |
| 4021 | agaccggcgg  | ccaaaagagc  | acctgtattc  | cctgcagaga  | ttacagcatc  | cgctgctttc  |
| 4081 | tccttaacag  | cttgtgcacc  | caaaaccatc  | gaagctttct  | ttttctttcg  | aattgctttg  |
| 4141 | acgggctcgt  | catccgaatt  | tatcttttca  | tcagtatgta  | caatgctcac  | acgttcattc  |
| 4201 | gctatcaaat  | agtttttgat  | tttagcttcg  | tcaccataaa  | gctggatttc  | aatatctttg  |
| 4261 | aactctgcta  | aagcttggtt  | aactccctct  | acgatcgctt  | gtggcgcatt  | atcgccaccc  |
| 4321 | atagcatcca  | ctgcaattac  | aggcatagca  | ttctccctct  | catcctctgc  | tcttaacaaa  |
| 4381 | tagactcaaa  | ttctattaat  | aaatcactct  | glatcaaaaga | tagacatccc  | tcggtcacta  |
| 4441 | tccccagcag  | agtctttcag  | cttattgtcc  | tcttattata  | gcacgaactg  | acctgcattt  |
| 4501 | taacccttga  | gactgaaaac  | ctctacattc  | ctgtttcacg  | tgaacaaaaa  | gaagacaatg  |
| 4561 | cttaatcagc  | attatcttct  | ttactcataa  | tatgacccca  | agaatttaga  | ttatcaataa  |
| 4621 | acttcttgct  | tttaagatga  | atcccaacat  | aattatcata  | aagctcatca  | ataaattgtc  |
| 4681 | tcaactttcg  | tttcattttca | tccttaacag  | atatgcttct  | caattcttca  | aacgaaagac  |
| 4741 | cctggaaacg  | atccaaaaga  | taaggcacat  | tagggtccaa  | atgactacgc  | ctttcatctt  |
| 4801 | cttcgtaatg  | attgggacaa  | agtaaacctg  | agaacttata  | cgagaaatca  | aaaggaagac  |
| 4861 | caacacgatg  | acaaaagaca  | cattcatgaa  | aattcaatcg  | tacgccaaaa  | cgggtccaaaa |
| 4921 | cttgaatctc  | aaagatatta  | gtcaatat    | cataatctaa  | gccctcttcc  | attaacacaa  |
| 4981 | gggttttctc  | taaaaatgca  | aataattgtg  | catctaccac  | accgtcagca  | atagcagcat  |
| 5041 | cagtcaaggc  | agctaaatag  | gtcgcgtaag  | acagtttaaa  | aatatcactt  | gtaatttctt  |
| 5101 | taaaagactc  | tgcctgacta  | taatcctcta  | tgaagataa   | accttcatca  | tttacagtca  |
| 5161 | tcataaattc  | agcgatgttt  | aaaggttgaa  | tcacagcact  | caattttacct | gaccaccac   |
| 5221 | ctctaacaaa  | aaacatccgt  | ttaccagctt  | gtttagttaa  | aatcttaacc  | agcttatcat  |
| 5281 | tctcacgata  | attacgattg  | aagaggataa  | acccctact   | ctcaagcttc  | tgcattgtct  |
| 5341 | tccataaact  | ctttcaaacg  | agtcatagct  | gtttcaatag  | tgtccatgct  | agctgcatac  |
| 5401 | gacaatcgaa  | cataaccttc  | gccatatttc  | ccaaaagcaa  | cgccaggaat  | aatagcaata  |
| 5461 | gctttttcac  | gagcaaagtc  | ttgacagaac  | ttaaaggagt  | cttgattata  | tccttctgga  |
| 5521 | atcttagcaa  | agatatagaa  | ggcaccatca  | ggtttaataa  | ttttgaaacc  | aagttcagtc  |
| 5581 | attttttcaa  | gaatataatc  | ccgacgtttc  | aaatactcaa  | ctttcattgg  | ttgtgcatca  |
| 5641 | tccttaccag  | cagataatgc  | ttcgatagct  | gcaaatgtg   | ccatagtagc  | tgcagccgtc  |
| 5701 | accaaatact  | ggtgactctt  | aatcaactga  | gccgtcaaac  | tttctggtgc  | aaaaataaaa  |
| 5761 | ccaatacgcc  | atcctgtcat  | cgcattgagat | ttcgacaagc  | cgttgattaa  | aatagtttgc  |
| 5821 | tcaggcaaat  | attcagcaat  | agaaacatgt  | tgatctacat  | aagttagttc  | tgaatatact  |
| 5881 | tcatcactaa  | caacaaaaat  | atcatatttt  | ttcagaactt  | cagcaatatc  | ctcaatctgt  |
| 5941 | tggcgtgaat  | aagtcacacc  | tgttggtgtg  | gttggttagt  | taagtaaaac  | agccttaagc  |
| 6001 | ttatcacctt  | gctctaaaat  | tgccttttct  | aacatctccg  | gtgtcaaaac  | aaaatcatta  |
| 6061 | gctgtgtgat  | caatttcaac  | aattttagcc  | ccaactagat  | ttgcaaatcg  | ctcatattct  |
| 6121 | ggataggctg  | gtgcaggcaa  | aagaatcgta  | tcacctggct  | ccaaaatagc  | gtttaagac   |
| 6181 | gcagaaagag  | cttctgtggc  | cccaatagtt  | accaaatttt  | cattatcggg  | attataagtt  |
| 6241 | agattgtatt  | tttccttaac  | aaaattcgca  | gcagcttggc  | gcaaatcagg  | aagtccagcc  |
| 6301 | atacctgtat  | agtgtgactg  | gttcgcatca  | atcgcagttt  | tagctgcttc  | tttcacatga  |
| 6361 | tctggagtcg  | taaaatcagg  | ttctccaagc  | gtcaactttt  | taatacctgg  | aacatctgaa  |
| 6421 | attgattgggt | caaactgacg  | aatcattgag  | acttcaatct  | tatctaaatt  | ttttattaaa  |
| 6481 | acgttgtgtt  | aaatccatca  | cagtcacctc  | tttgcaatta  | ttcctaacat  | tatatcaaaa  |
| 6541 | actcaaacgc  | atttaaacac  | caaaaaactg  | tcctaggcta  | gctttaatgg  | ctctataatt  |
| 6601 | tctgtagggg  | gtaaaaacca  | ctgtagagat  | tatggagctt  | tttaaatgca  | gacaaaaagt  |
| 6661 | tccataagaa  | ctataatgaa  | aagcgactaa  | accatcatta  | gcaagaactc  | atgagatcta  |
| 6721 | ttaagaatac  | cacagagtta  | aatcccttaa  | catcattact  | tctcttgttt  | tcgaaaaaga  |
| 6781 | tacctacatc  | gaggttcaag  | caaaactgga  | actccaacac  | tacgacgcct  | gaagaaacat  |
| 6841 | cgcttacagt  | gtaaagattg  | tagaaaagtc  | acggttgctg  | agacattaat  | cgttgagaaa  |
| 6901 | aaccacccaa  | tctccaatct  | tatccgacaa  | aaggtaagg   | ttatcacgat  | ggacatgtca  |
| 6961 | ggagcttata  | ttccactagt  | tcgaagactt  | tcctaaatgc  | ccaaatcatt  | attgatcggt  |
| 7021 | tccacatcat  | ccagcagctt  | gatcaagcct  | ttttaagac   | aagaattgcc  | attatgaacc  |



|       |             |             |            |             |             |            |
|-------|-------------|-------------|------------|-------------|-------------|------------|
| 7081  | agttcaataa  | gaagccacta  | ccttatcgat | ctttaaaaaat | caactggagac | tcgccgtaag |
| 7141  | ttatcttgta  | aatcatttca  | ctcgaagacc | ttttgtcaaa  | ccttaaacc   | acatgaagtc |
| 7201  | gttgagaaga  | cactgaat    | ctcagaagag | atcgctaatt  | attacaacct  | ctatcaacct |
| 7261  | ttgctttttc  | actttcagga  | taagagggtg | aatgagtttt  | ttcaccccat  | agaggagaaa |
| 7321  | ataagcaagg  | tcaattatta  | cttcaaaaca | gtcttttagga | cctttcttag  | acacaaacga |
| 7381  | tacatcaaaa  | atgcaccaaa  | aacacagtcc | tcacatgcaa  | aattggagg   | gaccaataag |
| 7441  | cttatcaaag  | atattaaacg  | tctgggcttc | ggtttttagaa | attttattaa  | ctttaggaag |
| 7501  | catgttttca  | tcactcttaa  | catacaaaaa | gagaagacct  | atctgatcct  | ctctagatgt |
| 7561  | tagcttttcg  | tcacccacta  | cagttgacaa | aaagccgatg  | tttcaaacac  | aacctctgtt |
| 7621  | tcaaatgaat  | ctgacaagag  | acgattagta | tctggataat  | ttccttctag  | taaacgtgtg |
| 7681  | taaaaagaga  | ttgtctcact  | acggaataga | atgtgatttg  | cagagaagaa  | aatttccaaa |
| 7741  | ttttcaatac  | catcactaaa  | gactgctgat | aactctttta  | gtgatcggct  | tgggattact |
| 7801  | acatcaaagt  | tatctgcaga  | atgttccaaa | acaagttgac  | gttggctcat  | acgatgagaa |
| 7861  | tcagtggcaa  | cagctttaag  | atctttgtga | tttgaaagaa  | caaagtgaac  | tccagttaaa |
| 7921  | attggacgac  | tttcttgctg  | gcttgctgca | aatgacgttt  | cagcaatgat  | agattttaac |
| 7981  | attttagtgt  | ccataattag  | tggtgtcaag | ctgtcaactt  | cttgaatacg  | aggatattgc |
| 8041  | tcagcatcct  | cttcttttag  | agtaatctct | gatttagcac  | tcttttagtaa | tacttggtat |
| 8101  | tgttctat    | cttcaaatgt  | aagagtaaca | tcaggtaagc  | ttgaaacaac  | gttgatgaaa |
| 8161  | aaattcgctt  | ctaaaaggat  | actacctggt | tgtgtaatta  | ataaacctgc  | attttcttct |
| 8221  | gaagcagaga  | tgctattctc  | tatcgagatt | tgtccatttg  | agccagttaa  | atagatacca |
| 8281  | tcactagtaa  | cttcgatttt  | tatagttgat | agaatgggaa  | tagcattttt  | tgaagaaata |
| 8341  | gcacgtcgag  | ttgtatgaag  | ggcttgtagg | aaataagctt  | tattaatggc  | aaattgaatc |
| 8401  | atgttgctcc  | tttattttat  | tagtattatg | ttagtagtag  | tagtaggtct  | tgtggatatt |
| 8461  | gtgcataaat  | atctaaatca  | cagttttatc | aagattttta  | acttgtgcac  | atcttgtgga |
| 8521  | aaactgtgta  | taagttttag  | tagttatcca | caagtgttat  | tttatcttgt  | ttttaatggt |
| 8581  | atcaatttca  | atgcgtaaac  | tgatcatctg | agcaagcata  | tttttgattt  | tattgtaagc |
| 8641  | atgtagaaca  | gttgagtgat  | ctcttctctc | aaattctttt  | ccaatttttg  | gaagggagtt |
| 8701  | atcagtcatt  | tcacgcgcaa  | gatacatggc | aacctgacgc  | gctaagacaa  | tattttgtgt |
| 8761  | tcgttttagtt | gccttaatct  | ctttaaccgt | gacattataa  | aatttcccaa  | cctcactttg |
| 8821  | gatgtcttca  | atcggaatga  | gagttaactt | agggccatct  | attttacgtg  | cacgaatagc |
| 8881  | ttcggcagct  | acttcaactg  | tgatcgtatc | taactggcgg  | acatttgcaa  | ctaagcta   |
| 8941  | atctttcaaa  | gctccctcta  | agtcgcggac | atgtgagtc   | aattggccag  | ctaaatactc |
| 9001  | aattgtttca  | ggtggaaaat  | ggtaatcata | gtccataatc  | ttattggtaa  | gaatagcaac |
| 9061  | tcgggtttca  | aagtcaggcg  | gtgtaatatt | tacagtcaag  | ccccatttga  | agcgcgtgac |
| 9121  | aagacgctct  | tccatttcat  | tcaattgatc | tggttttcgg  | tcgctagtca  | agacaatttg |
| 9181  | tttattatta  | tcgtgaagga  | cattgaaagt | attgaaaaat  | tcctcttgag  | tggcttgcgt |
| 9241  | agacttttta  | gccaacgatt  | gtatatcatc | aattaaaagc  | acgtctagat  | ggcggtat   |
| 9301  | tagcttttagt | tcattccattt | tatctaaacg | gatatgtaaa  | acaaactcat  | taataaaatt |
| 9361  | ttcggcagtt  | atgtatttga  | ttcgtgcttg | gggattatca  | tgtaagacct  | tattaccaat |
| 9421  | ggcattgagc  | aagtgaagttt | ttcctagacc | aggtcccca   | taaatgaata  | aagggttata |
| 9481  | agttgctcct  | ggtgaatcag  | ctacagctag | agatgctgct  | acagaccagc  | ggttttcac  |
| 9541  | tccttgaata  | aaattatcaa  | aggtatactt | actatttaag  | tctgagttca  | aagtgggaag |
| 9601  | atcagtggtt  | tggtgttccc  | ttttattgct | gaagtcattg  | tttgctaaag  | ttggttttgt |
| 9661  | ttcgctaacg  | agagcctcgt  | caaagacata | ttcaactttt  | atttcactat  | tgtagacttc |
| 9721  | aaatccagtc  | atcaaatga   | aagattgc   | gttcttttcc  | cagaatagtt  | tcttgacttc |
| 9781  | ttcaagcaga  | attgtagcaa  | cgttatcttg | aattttgatg  | agcttggtat  | ctaggacata |
| 9841  | ataatcaaaa  | gtggcttggtg | ttagtcttct | tttggccagc  | tctaagagct  | tattccaaaa |
| 9901  | aaaaatgctc  | tttttcggtc  | attttatcaa | ttctccatct  | ttattcttgt  | cctctgattc |
| 9961  | tatcataaaa  | cgaaaaagtt  | ttccacaggt | cagaaaagaga | aaagttttga  | ggttatccac |
| 10021 | aaccataaaa  | aaaggttatt  | cacactgtga | ataaaaagttt | tccacagcct  | gttgataata |
| 10081 | aagaaacctt  | ttaaaataaa  | gggtagacac | tattttttacg | atgtggataa  | gtctgattta |
| 10141 | ccttttttcta | caattaacag  | cttagataag | cttggttgata | attctgttaa  | aatcttcttc |
| 10201 | tgtcgaaaag  | tgtatttgaa  | tcgttcctga | gtgatttttg  | tgataacgta  | gagttatggg |
| 10261 | gagacctagt  | gatctttcaa  | gtttcttttt | tcctttatctt | ttacatgggt  | atctttttta |
| 10321 | gattttttgt  | tttctaggaa  | gttcctgaag | tttttttttt  | ctagagtacg  | aacagaccat |
| 10381 | ctttcagcca  | caacctgctg  | aaagatgggt | aactgctttc  | gagaatcctc  | aatagctaag |
| 10441 | agtgtcttag  | catgtccctg  | actcagactt | ccgttttcaa  | tactcgtttg  | tatctctcgc |
| 10501 | ggaagttgta  | gtagtctaag  | agcgttacta | atatatgggtc | tagattttcc  | catagcttta |
| 10561 | gcgagctcct  | cgtgactata  | agttaactca | tcaattaaat  | tacgataggc  | ctttgcttct |
| 10621 | tcaataggat  | tgagatttga  | tcgttgtaga | ttttcaataa  | tagcttggtt  | acgactctct |
| 10681 | tgatctgtaa  | cttcctttac  | aactgcaggg | atttctgtca  | tccctaaacg  | tttacaggct |

10741 cgtaaacgct tttctccagc aattagttca taaccaataa tgtcagattt tcgtacaata  
10801 attggctgta ttaaaccatt ttctgatatt gattgactta gttctactaa ctcttcatcg  
10861 gagaatttta gacgaggttg aaaaggattg gggtaaattt cactaataga taaagttttg  
10921 agttgttctg acatggtatt ctttcccaa aaaaagacct ttacattatt gtaaagggtct  
10981 tttgacagat ttgtcaataa ttaatcagat atgtcttctg tagattttgt taatttaaga  
11041 tctacagttt tcttatcttt accacgatag aaggttacct tgatagtatc tccgatacta  
11101 tggctgtaaa gattggtttg aatatcagtt tttgagctga ttttcttacc atcaatctca  
11161 gtgataacat catattcttg aagtttaccg tcagctggca tacctttctg aacactaccg  
11221 acaacaacac cggatttgac ctcatctggt aaatctaatt tagaagttgc gctgctagaa  
11281 aggtatttaa gatctgctat tgagatccct agtgctggtc gtgtaacttt accatctttt  
11341 tctaattgat tgatgatttc aacaacatcg tttgatggaa tggcaaacc ccatccttca  
11401 acagcactac cagcgactgc agacgttgat gaaattttac ttgagttaat accgataact  
11461 tgtccttcaa tattgactag ggcaccacca gagttaccag tgggatcctc tagagtcgac  
11521 ctgcaggcat gcaagcttga gtattctata gtctcaccta aatagcttgg cgtaatcatg  
11581 gtcatagct

//

**Ampl contig 2**

LOCUS 1A\_2

DEFINITION

FEATURES

|      | Location/Qualifiers                                                                                                                                                                                                                                                                                                           |
|------|-------------------------------------------------------------------------------------------------------------------------------------------------------------------------------------------------------------------------------------------------------------------------------------------------------------------------------|
| gene | 1..255<br>/rbs_motif="None"<br>/uscore="0.0"<br>/rscore="0.0"<br>/sscore="3.22"<br>/locus_tag="1A_12"<br>/conf="99.29"<br>/ID="1A_12"<br>/cscore="18.26"<br>/partial=10<br>/tscore="3.22"<br>/gc_cont="0.412"<br>/rbs_spacer="None"<br>/start_type="Edge"<br>/score=21.5<br>/codon_start=1                                    |
| CDS  | 1..255<br>/rbs_motif="None"<br>/uscore="0.0"<br>/rscore="0.0"<br>/sscore="3.22"<br>/locus_tag="1A_12"<br>/conf="99.29"<br>/ID="1A_12"<br>/cscore="18.26"<br>/partial=10<br>/tscore="3.22"<br>/gc_cont="0.412"<br>/rbs_spacer="None"<br>/product="hypothetical protein"<br>/start_type="Edge"<br>/score=21.5<br>/codon_start=1 |
| gene | complement(430..1758)<br>/rbs_motif="GGAG/GAGG"<br>/uscore="4.62"<br>/rscore="6.9"<br>/sscore="7.88"<br>/locus_tag="1A_13"<br>/conf="100.0"<br>/ID="1A_13"<br>/cscore="166.07"<br>/partial=0<br>/tscore="-3.65"<br>/gc_cont="0.414"<br>/rbs_spacer="5-10bp"<br>/start_type="TTG"<br>/score=174.0<br>/codon_start=1            |
| CDS  | complement(430..1758)<br>/rbs_motif="GGAG/GAGG"<br>/uscore="4.62"<br>/rscore="6.9"<br>/sscore="7.88"<br>/locus_tag="1A_13"<br>/conf="100.0"<br>/ID="1A_13"                                                                                                                                                                    |

```

/cscore="166.07"
/partial=0
/tscore="-3.65"
/gc_cont="0.414"
/rbs_spacer="5-10bp"
/product="transposase"
/start_type="TTG"
/score=174.0
/codon_start=1
gene complement(1851..2789)
/rbs_motif="None"
/uscore="-2.87"
/rscore="-4.19"
/sscore="-10.51"
/locus_tag="1A_14"
/conf="82.35"
/ID="1A_14"
/cscore="17.21"
/partial=0
/tscore="-4.67"
/gc_cont="0.374"
/rbs_spacer="None"
/start_type="TTG"
/score=6.7
/codon_start=1
CDS complement(1851..2789)
/rbs_motif="None"
/uscore="-2.87"
/rscore="-4.19"
/sscore="-10.51"
/locus_tag="1A_14"
/conf="82.35"
/ID="1A_14"
/cscore="17.21"
/partial=0
/tscore="-4.67"
/gc_cont="0.374"
/rbs_spacer="None"
/product="transposase, partial"
/start_type="TTG"
/score=6.7
/codon_start=1

```

```

BASE COUNT      723 a      514 c      632 g      918 t
ORIGIN

```

```

1  catttttccg cactccttac acttgaaacg gcgctttttc aggcgaatga gagttcggta
61  gccagcacac tccagatacg ggatttttaga ggctttctgg aagtcgtatt tgcccatctg
121 tcccttgca g caggacatt taggagactc gtaatccaag taaccgtgaa gttcctttgtg
181 cattcccata tcgtattcat tagtgatgat aatatttttg tcttttattc caagaaaatt
241 tgtgataaga tttagttggt ccatatgagt ctttctaaaa tgatggttta gtcgcttttc
301 attataggtc atatgggact ttttttctac aatcaaaaag gctccataat ctccatagag
361 gatttaccce ctacagaaat tatagagcct gananggctc tttgtcaact gtagtgggta
421 gatgaaaagc taaattcctg agaggaccag tttggtcttc tcttttttaa tattttactgc
481 catcaaaatc cgtttcttaa agttttcaaa gttcctgaag ccaaaggcat ttcgcttaat
541 gaccttgatg agattgttcg ttgcttccag ttttgcgttt gaatacggca gttcgagggc
601 gttgataatc ttgtctttat ctttcaaaaa agttctaaaa actgtctgaa agataggggtg
661 tacgctggaa ctgcgtctct caatgaggtc aaagaaatgg tccgagttct tctcttgtaa
721 atggaaaagt aaaagttggt agagttcata atgttctctc agttcttgag agtatgacag
781 tagcttttct aggatttcct tggtgggtta atgcgcacga aaagtcggac gataaaagcg
841 tttatcgttg agtttgcgac tatcttggtg gatcagtttc cagtagcggt tcagggcacg
901 atattcctgt gactgacggt ccaaattggt catgatattga atgcggacgc ggttcatagc
961 acgactaagg tggtgcacaa tgtgaaagcg atcaaggaca atcttagcgt tagggaataa

```

|      |            |             |            |             |             |            |
|------|------------|-------------|------------|-------------|-------------|------------|
| 1021 | ttttctggcg | atgtcgtaat  | aagggctaaa | catgtccata  | gtgatgactt  | taacgcgatt |
| 1081 | tctatcctgt | ctggaatagc  | gtaggaagtg | gtttctaata  | gttgcttgcg  | tgcgtccgct |
| 1141 | gaggattgtg | atgactttta  | atgagtcgaa | atcctgagcg  | atgaaactca  | ttttccctt  |
| 1201 | cttgaagccg | tactcatccc  | agctcatatt | ctcaggcagc  | caattccagt  | cggttttaa  |
| 1261 | ttggaactca | tttagcttgc  | gactgacgg  | tgaggtagag  | acggcaaggc  | gcttggcaat |
| 1321 | gtcggtcata | gactgttttt  | caatgagcaa | ttgagcgatt  | ttctgataga  | cgacggttgc |
| 1381 | gatttggtga | ttcttcttga  | ccagagaagt | ttccgcgaca  | gccatttttc  | cgactcctt  |
| 1441 | acacttgaaa | cggcgctttt  | tcaggcgaat | gagagttcgg  | tagccagcac  | actccagata |
| 1501 | cgggatttta | gaggctttct  | ggaagtcgta | tttgcccatc  | tgtcccttgc  | aggcaggaca |
| 1561 | tttaggagac | tcgtaatcca  | agtaaccgtg | aagttctttg  | tgcattccca  | tatcgtattc |
| 1621 | attagtgatg | ataatatatt  | tgtcttttat | tccaagaaaa  | tttgtgataa  | gatttagttg |
| 1681 | ttccatatga | gtctttctaa  | aatgatggtt | tagtcgcttt  | tcattatagg  | tcatatggga |
| 1741 | ctttttttct | acaatcaaaa  | aggctccata | atctccatag  | aggattttacc | cactacagaa |
| 1801 | attatagagc | cnnaaaggct  | ctttgtcaac | tgtagtgggt  | agatgaaaag  | ctaaattcct |
| 1861 | gagaggacca | gtttggtcct  | ctctttttta | atatttactg  | ccatcaaaat  | ccgtttctta |
| 1921 | aagttttcaa | agttcctgaa  | gccaaaggca | tttcgcttaa  | tgaccttgat  | gagattgttc |
| 1981 | gttgcttcca | gttttgcggt  | tgaatacggc | agttcgaggg  | cgttgataat  | cttgtcttta |
| 2041 | tctttcaaaa | aagttctaaa  | aactgtctga | aagatagggt  | gtacgctgga  | actcgtctct |
| 2101 | tcaatgaggt | caaagaaatg  | gtccgagttc | ttctcttgga  | aatggaaaag  | taaaagttgg |
| 2161 | tagagttcat | aatgttctct  | cagttcttga | gagtatgaca  | gtagcttttc  | taggatttcc |
| 2221 | ttgttggtta | aatgcgcacg  | aaaagtcgga | cgataaaaagc | gtttatcggt  | gagtttgca  |
| 2281 | ctatcttggt | ggatcagttt  | ccagtagcgt | ttcagggcac  | gatattcctg  | tgactgacgg |
| 2341 | tccaaatggt | tcatgatattg | aatgcggacg | cggttcatag  | cacgactaag  | gtgttgca   |
| 2401 | atgtgaaagc | gatcaaggac  | aatcttagcg | ttagggaata  | attttctggc  | gatgtcgtaa |
| 2461 | taagggctaa | acatgtccat  | agtgatgact | ttaacgcgat  | ttctatcctg  | tctggaatag |
| 2521 | cgtaggaagt | ggtttctaat  | cgttgcttgc | gtgcgtccgt  | cgaggattgt  | gatgactttt |
| 2581 | aatgagtcga | aatcctgagc  | gatgaaactc | atttttccct  | tcttgaagcc  | gtactcatcc |
| 2641 | cagctcatat | tctcaggcag  | ccaattccag | tcggttttta  | attggaactc  | atttagcttg |
| 2701 | cgactgacgg | ttgaggtaga  | gacggcaagg | cgcttgga    | tgctcggtcat | agactgtttt |
| 2761 | tcaatgagca | attgagcgat  | tttctgatag | a           |             |            |

//

**Amp3**

LOCUS 3A

DEFINITION

FEATURES

gene

Location/Qualifiers

284..1903

/rbs\_motif="AGGAG"

/uscore="6.97"

/rscore="11.88"

/sscore="21.91"

/locus\_tag="3A\_01"

/conf="99.99"

/ID="3A\_01"

/cscore="406.56"

/partial=0

/tscore="3.07"

/gc\_cont="0.423"

/rbs\_spacer="5-10bp"

/start\_type="ATG"

/score=428.5

/codon\_start=1

CDS

284..1903

/rbs\_motif="AGGAG"

/uscore="6.97"

/rscore="11.88"

/sscore="21.91"

/locus\_tag="3A\_01"

/conf="99.99"

/ID="3A\_01"

/cscore="406.56"

/partial=0

/tscore="3.07"

/gc\_cont="0.423"

/rbs\_spacer="5-10bp"

/product="molecular chaperone GroEL"

/start\_type="ATG"

/score=428.5

/codon\_start=1

gene

1996..2262

/rbs\_motif="None"

/uscore="1.38"

/rscore="-3.27"

/sscore="1.18"

/locus\_tag="3A\_02"

/conf="99.54"

/ID="3A\_02"

/cscore="22.17"

/partial=0

/tscore="3.07"

/gc\_cont="0.322"

/rbs\_spacer="None"

/start\_type="ATG"

/score=23.4

/codon\_start=1

CDS

1996..2262

/rbs\_motif="None"

/uscore="1.38"

/rscore="-3.27"

/sscore="1.18"

/locus\_tag="3A\_02"

/conf="99.54"

/ID="3A\_02"

|      |                                                                                                                                                                                                                                                                                                                                |
|------|--------------------------------------------------------------------------------------------------------------------------------------------------------------------------------------------------------------------------------------------------------------------------------------------------------------------------------|
|      | /cscore="22.17"<br>/partial=0<br>/tscore="3.07"<br>/gc_cont="0.322"<br>/rbs_spacer="None"<br>/product="transposase"<br>/start_type="ATG"<br>/score=23.4<br>/codon_start=1                                                                                                                                                      |
| gene | 2344..2511<br>/rbs_motif="GGAG/GAGG"<br>/uscore="0.66"<br>/rscore="4.56"<br>/sscore="7.24"<br>/locus_tag="3A_03"<br>/conf="97.63"<br>/ID="3A_03"<br>/cscore="8.93"<br>/partial=0<br>/tscore="2.02"<br>/gc_cont="0.405"<br>/rbs_spacer="5-10bp"<br>/start_type="ATG"<br>/score=16.2<br>/codon_start=1                           |
| CDS  | 2344..2511<br>/rbs_motif="GGAG/GAGG"<br>/uscore="0.66"<br>/rscore="4.56"<br>/sscore="7.24"<br>/locus_tag="3A_03"<br>/conf="97.63"<br>/ID="3A_03"<br>/cscore="8.93"<br>/partial=0<br>/tscore="2.02"<br>/gc_cont="0.405"<br>/rbs_spacer="5-10bp"<br>/product="transposase"<br>/start_type="ATG"<br>/score=16.2<br>/codon_start=1 |
| gene | 2622..2840<br>/rbs_motif="None"<br>/uscore="1.25"<br>/rscore="-3.78"<br>/sscore="-6.56"<br>/locus_tag="3A_04"<br>/conf="95.09"<br>/ID="3A_04"<br>/cscore="19.45"<br>/partial=0<br>/tscore="-4.02"<br>/gc_cont="0.411"<br>/rbs_spacer="None"<br>/start_type="GTG"<br>/score=12.9<br>/codon_start=1                              |
| CDS  | 2622..2840<br>/rbs_motif="None"<br>/uscore="1.25"                                                                                                                                                                                                                                                                              |

```

/rscore="-3.78"
/sscore="-6.56"
/locus_tag="3A_04"
/conf="95.09"
/ID="3A_04"
/cscore="19.45"
/partial=0
/tscore="-4.02"
/gc_cont="0.411"
/rbs_spacer="None"
/product="transposase, partial"
/start_type="GTG"
/score=12.9
/codon_start=1
gene 2898..3125
/rbs_motif="GGA/GAG/AGG"
/uscore="3.62"
/rscore="-1.62"
/sscore="5.41"
/locus_tag="3A_05"
/conf="99.59"
/ID="3A_05"
/cscore="18.52"
/partial=0
/tscore="2.76"
/gc_cont="0.342"
/rbs_spacer="11-12bp"
/start_type="ATG"
/score=23.9
/codon_start=1
CDS 2898..3125
/rbs_motif="GGA/GAG/AGG"
/uscore="3.62"
/rscore="-1.62"
/sscore="5.41"
/locus_tag="3A_05"
/conf="99.59"
/ID="3A_05"
/cscore="18.52"
/partial=0
/tscore="2.76"
/gc_cont="0.342"
/rbs_spacer="11-12bp"
/product="transposase"
/start_type="ATG"
/score=23.9
/codon_start=1
gene complement(3313..3621)
/rbs_motif="None"
/uscore="0.15"
/rscore="-3.27"
/sscore="-0.05"
/locus_tag="3A_06"
/conf="97.49"
/ID="3A_06"
/cscore="15.96"
/partial=0
/tscore="3.07"
/gc_cont="0.388"
/rbs_spacer="None"
/start_type="ATG"

```



|      |                                                                                                                                                                                                                                                                                                                                                    |
|------|----------------------------------------------------------------------------------------------------------------------------------------------------------------------------------------------------------------------------------------------------------------------------------------------------------------------------------------------------|
|      | <pre> /score=15.9 /codon_start=1 complement(3313..3621) /rbs_motif="None" /uscore="0.15" /rscore="-3.27" /sscore="-0.05" /locus_tag="3A_06" /conf="97.49" /ID="3A_06" /cscore="15.96" /partial=0 /tscore="3.07" /gc_cont="0.388" /rbs_spacer="None" /product="hypothetical protein Y021_01175" /start_type="ATG" /score=15.9 /codon_start=1 </pre> |
| CDS  |                                                                                                                                                                                                                                                                                                                                                    |
| gene | <pre> complement(3587..3943) /rbs_motif="GGAG/GAGG" /uscore="-1.98" /rscore="6.9" /sscore="2.53" /locus_tag="3A_07" /conf="100.0" /ID="3A_07" /cscore="41.29" /partial=0 /tscore="-3.65" /gc_cont="0.367" /rbs_spacer="5-10bp" /start_type="TTG" /score=43.8 /codon_start=1 </pre>                                                                 |
| CDS  |                                                                                                                                                                                                                                                                                                                                                    |
| gene | <pre> complement(3587..3943) /rbs_motif="GGAG/GAGG" /uscore="-1.98" /rscore="6.9" /sscore="2.53" /locus_tag="3A_07" /conf="100.0" /ID="3A_07" /cscore="41.29" /partial=0 /tscore="-3.65" /gc_cont="0.367" /rbs_spacer="5-10bp" /product="hypothetical protein" /start_type="TTG" /score=43.8 /codon_start=1 </pre>                                 |
| gene | <pre> complement(3936..4037) /rbs_motif="GGAG/GAGG" /uscore="1.38" /rscore="2.73" /sscore="5.33" /locus_tag="3A_08" /conf="90.9" /ID="3A_08" /cscore="4.68" </pre>                                                                                                                                                                                 |

|      |                                                                                                                                                                                                                                                                                                                                                                                                                              |
|------|------------------------------------------------------------------------------------------------------------------------------------------------------------------------------------------------------------------------------------------------------------------------------------------------------------------------------------------------------------------------------------------------------------------------------|
|      | <pre> /partial=0 /tscore="1.21" /gc_cont="0.422" /rbs_spacer="5-10bp" /start_type="ATG" /score=10.0 /codon_start=1 complement(3936..4037) /rbs_motif="GGAG/GAGG" /uscore="1.38" /rscore="2.73" /sscore="5.33" /locus_tag="3A_08" /conf="90.9" /ID="3A_08" /cscore="4.68" /partial=0 /tscore="1.21" /gc_cont="0.422" /rbs_spacer="5-10bp" /product="hypothetical protein" /start_type="ATG" /score=10.0 /codon_start=1 </pre> |
| CDS  |                                                                                                                                                                                                                                                                                                                                                                                                                              |
|      | <pre> complement(4132..4368) /rbs_motif="None" /uscore="-3.5" /rscore="-3.49" /sscore="-4.12" /locus_tag="3A_09" /conf="79.71" /ID="3A_09" /cscore="10.07" /partial=0 /tscore="2.87" /gc_cont="0.405" /rbs_spacer="None" /start_type="ATG" /score=6.0 /codon_start=1 </pre>                                                                                                                                                  |
| gene |                                                                                                                                                                                                                                                                                                                                                                                                                              |
|      | <pre> complement(4132..4368) /rbs_motif="None" /uscore="-3.5" /rscore="-3.49" /sscore="-4.12" /locus_tag="3A_09" /conf="79.71" /ID="3A_09" /cscore="10.07" /partial=0 /tscore="2.87" /gc_cont="0.405" /rbs_spacer="None" /product="putative uncharacterized protein" /start_type="ATG" /score=6.0 /codon_start=1 </pre>                                                                                                      |
| CDS  |                                                                                                                                                                                                                                                                                                                                                                                                                              |
|      | <pre> complement(4438..4770) /rbs_motif="AGGAG" /uscore="5.99" /rscore="11.88" </pre>                                                                                                                                                                                                                                                                                                                                        |
| gene |                                                                                                                                                                                                                                                                                                                                                                                                                              |

|      |                                                                                                                                                                                                                                                                                                                                                                                                                                                                                                                                                                                             |
|------|---------------------------------------------------------------------------------------------------------------------------------------------------------------------------------------------------------------------------------------------------------------------------------------------------------------------------------------------------------------------------------------------------------------------------------------------------------------------------------------------------------------------------------------------------------------------------------------------|
|      | /sscore="20.28"<br>/locus_tag="3A_10"<br>/conf="100.0"<br>/ID="3A_10"<br>/cscore="44.62"<br>/partial=0<br>/tscore="3.07"<br>/gc_cont="0.429"<br>/rbs_spacer="5-10bp"<br>/start_type="ATG"<br>/score=64.9<br>/codon_start=1<br>complement(4438..4770)<br>/rbs_motif="AGGAG"<br>/uscore="5.99"<br>/rscore="11.88"<br>/sscore="20.28"<br>/locus_tag="3A_10"<br>/conf="100.0"<br>/ID="3A_10"<br>/cscore="44.62"<br>/partial=0<br>/tscore="3.07"<br>/gc_cont="0.429"<br>/rbs_spacer="5-10bp"<br>/product="hypothetical protein X839_01085"<br>/start_type="ATG"<br>/score=64.9<br>/codon_start=1 |
| CDS  |                                                                                                                                                                                                                                                                                                                                                                                                                                                                                                                                                                                             |
|      | complement(4951..5823)<br>/rbs_motif="None"<br>/uscore="-3.3"<br>/rscore="-3.27"<br>/sscore="-4.15"<br>/locus_tag="3A_11"<br>/conf="100.0"<br>/ID="3A_11"<br>/cscore="84.66"<br>/partial=0<br>/tscore="3.07"<br>/gc_cont="0.431"<br>/rbs_spacer="None"<br>/start_type="ATG"<br>/score=80.5<br>/codon_start=1                                                                                                                                                                                                                                                                                |
| gene |                                                                                                                                                                                                                                                                                                                                                                                                                                                                                                                                                                                             |
|      | complement(4951..5823)<br>/rbs_motif="None"<br>/uscore="-3.3"<br>/rscore="-3.27"<br>/sscore="-4.15"<br>/locus_tag="3A_11"<br>/conf="100.0"<br>/ID="3A_11"<br>/cscore="84.66"<br>/partial=0<br>/tscore="3.07"<br>/gc_cont="0.431"<br>/rbs_spacer="None"<br>/product="RNA pseudouridylate synthase"<br>/start_type="ATG"<br>/score=80.5                                                                                                                                                                                                                                                       |
| CDS  |                                                                                                                                                                                                                                                                                                                                                                                                                                                                                                                                                                                             |

|      |                                                                                                                                                                                                                                                                                                                                               |
|------|-----------------------------------------------------------------------------------------------------------------------------------------------------------------------------------------------------------------------------------------------------------------------------------------------------------------------------------------------|
| gene | /codon_start=1<br>5889..8216<br>/rbs_motif="None"<br>/uscore="3.14"<br>/rscore="-3.27"<br>/sscore="2.94"<br>/locus_tag="3A_12"<br>/conf="99.99"<br>/ID="3A_12"<br>/cscore="394.79"<br>/partial=0<br>/tscore="3.07"<br>/gc_cont="0.427"<br>/rbs_spacer="None"<br>/start_type="ATG"<br>/score=397.7                                             |
| CDS  | /codon_start=1<br>5889..8216<br>/rbs_motif="None"<br>/uscore="3.14"<br>/rscore="-3.27"<br>/sscore="2.94"<br>/locus_tag="3A_12"<br>/conf="99.99"<br>/ID="3A_12"<br>/cscore="394.79"<br>/partial=0<br>/tscore="3.07"<br>/gc_cont="0.427"<br>/rbs_spacer="None"<br>/product="penicillin-binding protein 2A"<br>/start_type="ATG"<br>/score=397.7 |
| gene | /codon_start=1<br>8426..8602<br>/rbs_motif="AGGAG"<br>/uscore="0.01"<br>/rscore="8.27"<br>/sscore="2.63"<br>/locus_tag="3A_13"<br>/conf="69.09"<br>/ID="3A_13"<br>/cscore="0.87"<br>/partial=0<br>/tscore="-4.99"<br>/gc_cont="0.401"<br>/rbs_spacer="5-10bp"<br>/start_type="GTG"<br>/score=3.5                                              |
| CDS  | /codon_start=1<br>8426..8602<br>/rbs_motif="AGGAG"<br>/uscore="0.01"<br>/rscore="8.27"<br>/sscore="2.63"<br>/locus_tag="3A_13"<br>/conf="69.09"<br>/ID="3A_13"<br>/cscore="0.87"<br>/partial=0<br>/tscore="-4.99"                                                                                                                             |

```

/gc_cont="0.401"
/rbs_spacer="5-10bp"
/product="preprotein translocase subunit SecE"
/start_type="GTG"
/score=3.5
/codon_start=1
gene 8799..9338
/rbs_motif="AGGA"
/uscore="3.08"
/rscore="7.92"
/sscore="13.41"
/locus_tag="3A_14"
/conf="100.0"
/ID="3A_14"
/cscore="92.22"
/partial=0
/tscore="3.07"
/gc_cont="0.391"
/rbs_spacer="5-10bp"
/start_type="ATG"
/score=105.6
/codon_start=1
CDS 8799..9338
/rbs_motif="AGGA"
/uscore="3.08"
/rscore="7.92"
/sscore="13.41"
/locus_tag="3A_14"
/conf="100.0"
/ID="3A_14"
/cscore="92.22"
/partial=0
/tscore="3.07"
/gc_cont="0.391"
/rbs_spacer="5-10bp"
/product="transcription antitermination protein NusG"
/start_type="ATG"
/score=105.6
/codon_start=1
gene 9637..9948
/rbs_motif="None"
/uscore="-3.71"
/rscore="-3.27"
/sscore="-4.56"
/locus_tag="3A_15"
/conf="95.19"
/ID="3A_15"
/cscore="17.54"
/partial=0
/tscore="3.07"
/gc_cont="0.442"
/rbs_spacer="None"
/start_type="ATG"
/score=13.0
/codon_start=1
CDS 9637..9948
/rbs_motif="None"
/uscore="-3.71"
/rscore="-3.27"
/sscore="-4.56"
/locus_tag="3A_15"

```

|      |                                                                                                                                                                                                                                                                                                                  |
|------|------------------------------------------------------------------------------------------------------------------------------------------------------------------------------------------------------------------------------------------------------------------------------------------------------------------|
|      | <pre> /conf="95.19" /ID="3A_15" /cscore="17.54" /partial=0 /tscore="3.07" /gc_cont="0.442" /rbs_spacer="None" /product="phosphoesterase" /start_type="ATG" /score=13.0 /codon_start=1 </pre>                                                                                                                     |
| gene | <pre> complement(10080..10376) /rbs_motif="None" /uscore="-5.55" /rscore="-3.27" /sscore="-5.75" /locus_tag="3A_16" /conf="99.93" /ID="3A_16" /cscore="37.09" /partial=0 /tscore="3.07" /gc_cont="0.407" /rbs_spacer="None" /start_type="ATG" /score=31.3 /codon_start=1 </pre>                                  |
| CDS  | <pre> complement(10080..10376) /rbs_motif="None" /uscore="-5.55" /rscore="-3.27" /sscore="-5.75" /locus_tag="3A_16" /conf="99.93" /ID="3A_16" /cscore="37.09" /partial=0 /tscore="3.07" /gc_cont="0.407" /rbs_spacer="None" /product="haloacid dehalogenase" /start_type="ATG" /score=31.3 /codon_start=1 </pre> |
| gene | <pre> complement(10336..10575) /rbs_motif="None" /uscore="2.17" /rscore="-3.45" /sscore="-4.94" /locus_tag="3A_17" /conf="77.97" /ID="3A_17" /cscore="10.44" /partial=0 /tscore="-3.67" /gc_cont="0.408" /rbs_spacer="None" /start_type="GTG" /score=5.5 /codon_start=1 </pre>                                   |
| CDS  | <pre> complement(10336..10575) </pre>                                                                                                                                                                                                                                                                            |

```

/rbs_motif="None"
/uscore="2.17"
/rscore="-3.45"
/sscore="-4.94"
/locus_tag="3A_17"
/conf="77.97"
/ID="3A_17"
/cscore="10.44"
/partial=0
/tscore="-3.67"
/gc_cont="0.408"
/rbs_spacer="None"
/product="hypothetical protein Y018_01260"
/start_type="GTG"
/score=5.5
/codon_start=1
gene complement(10674..10910)
/rbs_motif="None"
/uscore="1.15"
/rscore="-3.49"
/sscore="0.53"
/locus_tag="3A_18"
/conf="98.04"
/ID="3A_18"
/cscore="16.5"
/partial=0
/tscore="2.87"
/gc_cont="0.401"
/rbs_spacer="None"
/start_type="ATG"
/score=17.0
CDS /codon_start=1
complement(10674..10910)
/rbs_motif="None"
/uscore="1.15"
/rscore="-3.49"
/sscore="0.53"
/locus_tag="3A_18"
/conf="98.04"
/ID="3A_18"
/cscore="16.5"
/partial=0
/tscore="2.87"
/gc_cont="0.401"
/rbs_spacer="None"
/product="haloacid dehalogenase"
/start_type="ATG"
/score=17.0
/codon_start=1
gene complement(10885..11343)
/rbs_motif="None"
/uscore="-2.29"
/rscore="-3.27"
/sscore="4.35"
/locus_tag="3A_19"
/conf="99.99"
/ID="3A_19"
/cscore="34.83"
/partial=0
/tscore="3.07"
/gc_cont="0.379"

```

|      |                                                                                                                                                                                                                                                                                                                                   |
|------|-----------------------------------------------------------------------------------------------------------------------------------------------------------------------------------------------------------------------------------------------------------------------------------------------------------------------------------|
|      | <pre> /rbs_spacer="None" /start_type="ATG" /score=39.2 /codon_start=1 </pre>                                                                                                                                                                                                                                                      |
| CDS  | <pre> complement(10885..11343) /rbs_motif="None" /uscore="-2.29" /rscore="-3.27" /sscore="4.35" /locus_tag="3A_19" /conf="99.99" /ID="3A_19" /cscore="34.83" /partial=0 /tscore="3.07" /gc_cont="0.379" /rbs_spacer="None" /product="cytochrome C" /start_type="ATG" /score=39.2 /codon_start=1 </pre>                            |
| gene | <pre> complement(11343..11651) /rbs_motif="AGxAGG/AGGxGG" /uscore="4.39" /rscore="3.21" /sscore="9.52" /locus_tag="3A_20" /conf="84.17" /ID="3A_20" /cscore="-2.25" /partial=0 /tscore="3.07" /gc_cont="0.398" /rbs_spacer="5-10bp" /start_type="ATG" /score=7.3 /codon_start=1 </pre>                                            |
| CDS  | <pre> complement(11343..11651) /rbs_motif="AGxAGG/AGGxGG" /uscore="4.39" /rscore="3.21" /sscore="9.52" /locus_tag="3A_20" /conf="84.17" /ID="3A_20" /cscore="-2.25" /partial=0 /tscore="3.07" /gc_cont="0.398" /rbs_spacer="5-10bp" /product="hypothetical protein Y018_01275" /start_type="ATG" /score=7.3 /codon_start=1 </pre> |
| gene | <pre> 11825..14326 /rbs_motif="GGAG/GAGG" /uscore="6.25" /rscore="6.9" /sscore="16.22" /locus_tag="3A_21" /conf="99.99" </pre>                                                                                                                                                                                                    |



|      |                                                                                                                                                                                                                                                                                                                                                                                                                                                      |
|------|------------------------------------------------------------------------------------------------------------------------------------------------------------------------------------------------------------------------------------------------------------------------------------------------------------------------------------------------------------------------------------------------------------------------------------------------------|
|      | <pre> /ID="3A_21" /cscore="477.58" /partial=0 /tscore="3.07" /gc_cont="0.457" /rbs_spacer="5-10bp" /start_type="ATG" /score=493.8 /codon_start=1 11825..14326 /rbs_motif="GGAG/GAGG" /uscore="6.25" /rscore="6.9" /sscore="16.22" /locus_tag="3A_21" /conf="99.99" /ID="3A_21" /cscore="477.58" /partial=0 /tscore="3.07" /gc_cont="0.457" /rbs_spacer="5-10bp" /product="leucyl-tRNA synthase" /start_type="ATG" /score=493.8 /codon_start=1 </pre> |
| CDS  |                                                                                                                                                                                                                                                                                                                                                                                                                                                      |
|      | <pre> 14668..14895 /rbs_motif="GGA/GAG/AGG" /uscore="0.79" /rscore="0.82" /sscore="-2.91" /locus_tag="3A_22" /conf="91.12" /ID="3A_22" /cscore="13.04" /partial=0 /tscore="-3.86" /gc_cont="0.311" /rbs_spacer="5-10bp" /start_type="GTG" /score=10.1 /codon_start=1 </pre>                                                                                                                                                                          |
| gene |                                                                                                                                                                                                                                                                                                                                                                                                                                                      |
|      | <pre> 14668..14895 /rbs_motif="GGA/GAG/AGG" /uscore="0.79" /rscore="0.82" /sscore="-2.91" /locus_tag="3A_22" /conf="91.12" /ID="3A_22" /cscore="13.04" /partial=0 /tscore="-3.86" /gc_cont="0.311" /rbs_spacer="5-10bp" /product="transcriptional regulator" /start_type="GTG" /score=10.1 /codon_start=1 </pre>                                                                                                                                     |
| CDS  |                                                                                                                                                                                                                                                                                                                                                                                                                                                      |
|      | <pre> 15025..15117 /rbs_motif="GGAG/GAGG" </pre>                                                                                                                                                                                                                                                                                                                                                                                                     |
| gene |                                                                                                                                                                                                                                                                                                                                                                                                                                                      |

|      |                                                                                                                                                                                                                                                                                                                                                                                                                                                                                                                                                                                                                  |
|------|------------------------------------------------------------------------------------------------------------------------------------------------------------------------------------------------------------------------------------------------------------------------------------------------------------------------------------------------------------------------------------------------------------------------------------------------------------------------------------------------------------------------------------------------------------------------------------------------------------------|
|      | /uscore="0.37"<br>/rscore="2.49"<br>/sscore="3.96"<br>/locus_tag="3A_23"<br>/conf="89.21"<br>/ID="3A_23"<br>/cscore="5.22"<br>/partial=0<br>/tscore="1.1"<br>/gc_cont="0.301"<br>/rbs_spacer="5-10bp"<br>/start_type="ATG"<br>/score=9.2<br>/codon_start=1<br>15025..15117<br>/rbs_motif="GGAG/GAGG"<br>/uscore="0.37"<br>/rscore="2.49"<br>/sscore="3.96"<br>/locus_tag="3A_23"<br>/conf="89.21"<br>/ID="3A_23"<br>/cscore="5.22"<br>/partial=0<br>/tscore="1.1"<br>/gc_cont="0.301"<br>/rbs_spacer="5-10bp"<br>/product="hypothetical protein Y018_01295"<br>/start_type="ATG"<br>/score=9.2<br>/codon_start=1 |
| CDS  | 15127..15549<br>/rbs_motif="GGA/GAG/AGG"<br>/uscore="1.07"<br>/rscore="0.91"<br>/sscore="6.23"<br>/locus_tag="3A_24"<br>/conf="99.56"<br>/ID="3A_24"<br>/cscore="17.31"<br>/partial=0<br>/tscore="3.07"<br>/gc_cont="0.338"<br>/rbs_spacer="5-10bp"<br>/start_type="ATG"<br>/score=23.5<br>/codon_start=1                                                                                                                                                                                                                                                                                                        |
| gene | 15127..15549<br>/rbs_motif="GGA/GAG/AGG"<br>/uscore="1.07"<br>/rscore="0.91"<br>/sscore="6.23"<br>/locus_tag="3A_24"<br>/conf="99.56"<br>/ID="3A_24"<br>/cscore="17.31"<br>/partial=0<br>/tscore="3.07"<br>/gc_cont="0.338"<br>/rbs_spacer="5-10bp"<br>/start_type="ATG"<br>/score=23.5<br>/codon_start=1                                                                                                                                                                                                                                                                                                        |
| CDS  | 15127..15549<br>/rbs_motif="GGA/GAG/AGG"<br>/uscore="1.07"<br>/rscore="0.91"<br>/sscore="6.23"<br>/locus_tag="3A_24"<br>/conf="99.56"<br>/ID="3A_24"<br>/cscore="17.31"<br>/partial=0<br>/tscore="3.07"<br>/gc_cont="0.338"<br>/rbs_spacer="5-10bp"<br>/product="acyl-CoA thioesterase"                                                                                                                                                                                                                                                                                                                          |

|      |                                                                                                                                                                                                                                                                                                                                                                                                                                                                                                                                                                                                                                                                                                                                                                                                                                                                                                                                                                                                                                                                                                                                                                                              |
|------|----------------------------------------------------------------------------------------------------------------------------------------------------------------------------------------------------------------------------------------------------------------------------------------------------------------------------------------------------------------------------------------------------------------------------------------------------------------------------------------------------------------------------------------------------------------------------------------------------------------------------------------------------------------------------------------------------------------------------------------------------------------------------------------------------------------------------------------------------------------------------------------------------------------------------------------------------------------------------------------------------------------------------------------------------------------------------------------------------------------------------------------------------------------------------------------------|
| gene | /start_type="ATG"<br>/score=23.5<br>/codon_start=1<br>15500..16123<br>/rbs_motif="GGAG/GAGG"<br>/uscore="-0.87"<br>/rscore="6.9"<br>/sscore="9.1"<br>/locus_tag="3A_25"<br>/conf="99.91"<br>/ID="3A_25"<br>/cscore="21.4"<br>/partial=0<br>/tscore="3.07"<br>/gc_cont="0.362"<br>/rbs_spacer="5-10bp"<br>/start_type="ATG"<br>/score=30.5<br>/codon_start=1<br>15500..16123<br>/rbs_motif="GGAG/GAGG"<br>/uscore="-0.87"<br>/rscore="6.9"<br>/sscore="9.1"<br>/locus_tag="3A_25"<br>/conf="99.91"<br>/ID="3A_25"<br>/cscore="21.4"<br>/partial=0<br>/tscore="3.07"<br>/gc_cont="0.362"<br>/rbs_spacer="5-10bp"<br>/product="acyl-CoA thioesterase"<br>/start_type="ATG"<br>/score=30.5<br>/codon_start=1<br>16553..18007<br>/rbs_motif="GGAGG"<br>/uscore="4.71"<br>/rscore="14.48"<br>/sscore="14.89"<br>/locus_tag="3A_26"<br>/conf="99.99"<br>/ID="3A_26"<br>/cscore="260.46"<br>/partial=0<br>/tscore="-3.65"<br>/gc_cont="0.424"<br>/rbs_spacer="5-10bp"<br>/start_type="TTG"<br>/score=275.4<br>/codon_start=1<br>16553..18007<br>/rbs_motif="GGAGG"<br>/uscore="4.71"<br>/rscore="14.48"<br>/sscore="14.89"<br>/locus_tag="3A_26"<br>/conf="99.99"<br>/ID="3A_26"<br>/cscore="260.46" |
| CDS  |                                                                                                                                                                                                                                                                                                                                                                                                                                                                                                                                                                                                                                                                                                                                                                                                                                                                                                                                                                                                                                                                                                                                                                                              |
| gene |                                                                                                                                                                                                                                                                                                                                                                                                                                                                                                                                                                                                                                                                                                                                                                                                                                                                                                                                                                                                                                                                                                                                                                                              |
| CDS  |                                                                                                                                                                                                                                                                                                                                                                                                                                                                                                                                                                                                                                                                                                                                                                                                                                                                                                                                                                                                                                                                                                                                                                                              |

|      |                                                                                                                                                                                                                                                                                                                                                                                                                                                                                                                                                                                                                                                                                                                                                                                                                                                                                                                                                                                                                                                              |
|------|--------------------------------------------------------------------------------------------------------------------------------------------------------------------------------------------------------------------------------------------------------------------------------------------------------------------------------------------------------------------------------------------------------------------------------------------------------------------------------------------------------------------------------------------------------------------------------------------------------------------------------------------------------------------------------------------------------------------------------------------------------------------------------------------------------------------------------------------------------------------------------------------------------------------------------------------------------------------------------------------------------------------------------------------------------------|
|      | <pre> /partial=0 /tscore="-3.65" /gc_cont="0.424" /rbs_spacer="5-10bp" /product="nicotinate phosphoribosyltransferase" /start_type="TTG" /score=275.4 /codon_start=1 18019..18840 /rbs_motif="AGGAG" /uscore="-0.2" /rscore="11.88" /sscore="15.89" /locus_tag="3A_27" /conf="100.0" /ID="3A_27" /cscore="152.94" /partial=0 /tscore="3.07" /gc_cont="0.428" /rbs_spacer="5-10bp" /start_type="ATG" /score=168.8 /codon_start=1 18019..18840 /rbs_motif="AGGAG" /uscore="-0.2" /rscore="11.88" /sscore="15.89" /locus_tag="3A_27" /conf="100.0" /ID="3A_27" /cscore="152.94" /partial=0 /tscore="3.07" /gc_cont="0.428" /rbs_spacer="5-10bp" /product="NAD synthetase" /start_type="ATG" /score=168.8 /codon_start=1 18856..19296 /rbs_motif="GGA/GAG/AGG" /uscore="4.04" /rscore="0.91" /sscore="9.13" /locus_tag="3A_28" /conf="99.99" /ID="3A_28" /cscore="32.27" /partial=0 /tscore="3.07" /gc_cont="0.365" /rbs_spacer="5-10bp" /start_type="ATG" /score=41.4 /codon_start=1 18856..19296 /rbs_motif="GGA/GAG/AGG" /uscore="4.04" /rscore="0.91" </pre> |
| gene |                                                                                                                                                                                                                                                                                                                                                                                                                                                                                                                                                                                                                                                                                                                                                                                                                                                                                                                                                                                                                                                              |
| CDS  |                                                                                                                                                                                                                                                                                                                                                                                                                                                                                                                                                                                                                                                                                                                                                                                                                                                                                                                                                                                                                                                              |
| gene |                                                                                                                                                                                                                                                                                                                                                                                                                                                                                                                                                                                                                                                                                                                                                                                                                                                                                                                                                                                                                                                              |
| CDS  |                                                                                                                                                                                                                                                                                                                                                                                                                                                                                                                                                                                                                                                                                                                                                                                                                                                                                                                                                                                                                                                              |

|      |                                                                                                                                                                                                                                                                                                                                        |
|------|----------------------------------------------------------------------------------------------------------------------------------------------------------------------------------------------------------------------------------------------------------------------------------------------------------------------------------------|
|      | /sscore="9.13"<br>/locus_tag="3A_28"<br>/conf="99.99"<br>/ID="3A_28"<br>/cscore="32.27"<br>/partial=0<br>/tscore="3.07"<br>/gc_cont="0.365"<br>/rbs_spacer="5-10bp"<br>/product="membrane protein"<br>/start_type="ATG"<br>/score=41.4<br>/codon_start=1                                                                               |
| gene | 19398..20735<br>/rbs_motif="GGAGG"<br>/uscore="0.57"<br>/rscore="14.48"<br>/sscore="18.11"<br>/locus_tag="3A_29"<br>/conf="99.99"<br>/ID="3A_29"<br>/cscore="240.78"<br>/partial=0<br>/tscore="3.07"<br>/gc_cont="0.407"<br>/rbs_spacer="5-10bp"<br>/start_type="ATG"<br>/score=258.9<br>/codon_start=1                                |
| CDS  | 19398..20735<br>/rbs_motif="GGAGG"<br>/uscore="0.57"<br>/rscore="14.48"<br>/sscore="18.11"<br>/locus_tag="3A_29"<br>/conf="99.99"<br>/ID="3A_29"<br>/cscore="240.78"<br>/partial=0<br>/tscore="3.07"<br>/gc_cont="0.407"<br>/rbs_spacer="5-10bp"<br>/product="aminopeptidase C"<br>/start_type="ATG"<br>/score=258.9<br>/codon_start=1 |
| gene | 20865..22193<br>/rbs_motif="GGAG/GAGG"<br>/uscore="4.62"<br>/rscore="6.9"<br>/sscore="7.88"<br>/locus_tag="3A_30"<br>/conf="100.0"<br>/ID="3A_30"<br>/cscore="166.14"<br>/partial=0<br>/tscore="-3.65"<br>/gc_cont="0.413"<br>/rbs_spacer="5-10bp"<br>/start_type="TTG"<br>/score=174.0                                                |

|      |                                                                                                                                                                                                                                                                                                                                                                       |
|------|-----------------------------------------------------------------------------------------------------------------------------------------------------------------------------------------------------------------------------------------------------------------------------------------------------------------------------------------------------------------------|
| CDS  | /codon_start=1<br>20865..22193<br>/rbs_motif="GGAG/GAGG"<br>/uscore="4.62"<br>/rscore="6.9"<br>/sscore="7.88"<br>/locus_tag="3A_30"<br>/conf="100.0"<br>/ID="3A_30"<br>/cscore="166.14"<br>/partial=0<br>/tscore="-3.65"<br>/gc_cont="0.413"<br>/rbs_spacer="5-10bp"<br>/product="transposase"<br>/start_type="TTG"<br>/score=174.0                                   |
| gene | /codon_start=1<br>complement(22269..24599)<br>/rbs_motif="AGxAGG/AGGxGG"<br>/uscore="2.45"<br>/rscore="3.21"<br>/sscore="10.0"<br>/locus_tag="3A_31"<br>/conf="99.99"<br>/ID="3A_31"<br>/cscore="400.21"<br>/partial=0<br>/tscore="3.07"<br>/gc_cont="0.395"<br>/rbs_spacer="5-10bp"<br>/start_type="ATG"<br>/score=410.2                                             |
| CDS  | /codon_start=1<br>complement(22269..24599)<br>/rbs_motif="AGxAGG/AGGxGG"<br>/uscore="2.45"<br>/rscore="3.21"<br>/sscore="10.0"<br>/locus_tag="3A_31"<br>/conf="99.99"<br>/ID="3A_31"<br>/cscore="400.21"<br>/partial=0<br>/tscore="3.07"<br>/gc_cont="0.395"<br>/rbs_spacer="5-10bp"<br>/product="penicillin-binding protein 1A"<br>/start_type="ATG"<br>/score=410.2 |
| gene | /codon_start=1<br>complement(24599..25108)<br>/rbs_motif="None"<br>/uscore="0.57"<br>/rscore="-3.27"<br>/sscore="-0.28"<br>/locus_tag="3A_32"<br>/conf="100.0"<br>/ID="3A_32"<br>/cscore="52.95"<br>/partial=0                                                                                                                                                        |

|      |                                                                                                                                                                                                                                                                                                                                                                                                                                                                          |
|------|--------------------------------------------------------------------------------------------------------------------------------------------------------------------------------------------------------------------------------------------------------------------------------------------------------------------------------------------------------------------------------------------------------------------------------------------------------------------------|
|      | /tscore="3.07"<br>/gc_cont="0.38"<br>/rbs_spacer="None"<br>/start_type="ATG"<br>/score=52.7<br>/codon_start=1<br>complement(24599..25108)<br>/rbs_motif="None"<br>/uscore="0.57"<br>/rscore="-3.27"<br>/sscore="-0.28"<br>/locus_tag="3A_32"<br>/conf="100.0"<br>/ID="3A_32"<br>/cscore="52.95"<br>/partial=0<br>/tscore="3.07"<br>/gc_cont="0.38"<br>/rbs_spacer="None"<br>/product="Holliday junction resolvase"<br>/start_type="ATG"<br>/score=52.7<br>/codon_start=1 |
| CDS  |                                                                                                                                                                                                                                                                                                                                                                                                                                                                          |
| gene | 25273..25395<br>/rbs_motif="GGAG/GAGG"<br>/uscore="-3.72"<br>/rscore="3.31"<br>/sscore="1.07"<br>/locus_tag="3A_33"<br>/conf="86.94"<br>/ID="3A_33"<br>/cscore="7.18"<br>/partial=0<br>/tscore="1.47"<br>/gc_cont="0.333"<br>/rbs_spacer="5-10bp"<br>/start_type="ATG"<br>/score=8.2<br>/codon_start=1                                                                                                                                                                   |
| CDS  | 25273..25395<br>/rbs_motif="GGAG/GAGG"<br>/uscore="-3.72"<br>/rscore="3.31"<br>/sscore="1.07"<br>/locus_tag="3A_33"<br>/conf="86.94"<br>/ID="3A_33"<br>/cscore="7.18"<br>/partial=0<br>/tscore="1.47"<br>/gc_cont="0.333"<br>/rbs_spacer="5-10bp"<br>/product="hypothetical protein"<br>/start_type="ATG"<br>/score=8.2<br>/codon_start=1                                                                                                                                |
| gene | 25409..25789<br>/rbs_motif="GGA/GAG/AGG"<br>/uscore="-2.94"<br>/rscore="0.91"<br>/sscore="2.17"                                                                                                                                                                                                                                                                                                                                                                          |

|      |                                                                                                                                                                                                                                                                                                                                                                                                                                                                                      |
|------|--------------------------------------------------------------------------------------------------------------------------------------------------------------------------------------------------------------------------------------------------------------------------------------------------------------------------------------------------------------------------------------------------------------------------------------------------------------------------------------|
|      | <pre> /locus_tag="3A_34" /conf="99.85" /ID="3A_34" /cscore="26.04" /partial=0 /tscore="3.07" /gc_cont="0.352" /rbs_spacer="5-10bp" /start_type="ATG" /score=28.2 /codon_start=1 25409..25789 /rbs_motif="GGA/GAG/AGG" /uscore="-2.94" /rscore="0.91" /sscore="2.17" /locus_tag="3A_34" /conf="99.85" /ID="3A_34" /cscore="26.04" /partial=0 /tscore="3.07" /gc_cont="0.352" /rbs_spacer="5-10bp" /product="hypothetical protein" /start_type="ATG" /score=28.2 /codon_start=1 </pre> |
| CDS  |                                                                                                                                                                                                                                                                                                                                                                                                                                                                                      |
|      | <pre> 25898..26230 /rbs_motif="GGAG/GAGG" /uscore="6.37" /rscore="6.9" /sscore="16.34" /locus_tag="3A_35" /conf="100.0" /ID="3A_35" /cscore="49.4" /partial=0 /tscore="3.07" /gc_cont="0.384" /rbs_spacer="5-10bp" /start_type="ATG" /score=65.7 /codon_start=1 </pre>                                                                                                                                                                                                               |
| gene |                                                                                                                                                                                                                                                                                                                                                                                                                                                                                      |
|      | <pre> 25898..26230 /rbs_motif="GGAG/GAGG" /uscore="6.37" /rscore="6.9" /sscore="16.34" /locus_tag="3A_35" /conf="100.0" /ID="3A_35" /cscore="49.4" /partial=0 /tscore="3.07" /gc_cont="0.384" /rbs_spacer="5-10bp" /product="cell division protein GpsB" /start_type="ATG" /score=65.7 /codon_start=1 </pre>                                                                                                                                                                         |
| CDS  |                                                                                                                                                                                                                                                                                                                                                                                                                                                                                      |



|      |                                                                                                                                                                                                                                                                                                                                           |
|------|-------------------------------------------------------------------------------------------------------------------------------------------------------------------------------------------------------------------------------------------------------------------------------------------------------------------------------------------|
| gene | 26763..27929<br>/rbs_motif="AGGA"<br>/uscore="3.86"<br>/rscore="7.92"<br>/sscore="14.19"<br>/locus_tag="3A_36"<br>/conf="99.99"<br>/ID="3A_36"<br>/cscore="197.17"<br>/partial=0<br>/tscore="3.07"<br>/gc_cont="0.404"<br>/rbs_spacer="5-10bp"<br>/start_type="ATG"<br>/score=211.4<br>/codon_start=1                                     |
| CDS  | 26763..27929<br>/rbs_motif="AGGA"<br>/uscore="3.86"<br>/rscore="7.92"<br>/sscore="14.19"<br>/locus_tag="3A_36"<br>/conf="99.99"<br>/ID="3A_36"<br>/cscore="197.17"<br>/partial=0<br>/tscore="3.07"<br>/gc_cont="0.404"<br>/rbs_spacer="5-10bp"<br>/product="RNA methyltransferase"<br>/start_type="ATG"<br>/score=211.4<br>/codon_start=1 |
| gene | 27932..29794<br>/rbs_motif="GGA/GAG/AGG"<br>/uscore="-2.12"<br>/rscore="0.91"<br>/sscore="-3.43"<br>/locus_tag="3A_37"<br>/conf="99.99"<br>/ID="3A_37"<br>/cscore="358.16"<br>/partial=0<br>/tscore="-3.48"<br>/gc_cont="0.404"<br>/rbs_spacer="5-10bp"<br>/start_type="GTG"<br>/score=354.7<br>/codon_start=1                            |
| CDS  | 27932..29794<br>/rbs_motif="GGA/GAG/AGG"<br>/uscore="-2.12"<br>/rscore="0.91"<br>/sscore="-3.43"<br>/locus_tag="3A_37"<br>/conf="99.99"<br>/ID="3A_37"<br>/cscore="358.16"<br>/partial=0<br>/tscore="-3.48"<br>/gc_cont="0.404"                                                                                                           |

```

/ rbs_spacer="5-10bp"
/ product="hypothetical protein Y018_01370"
/ start_type="GTG"
/ score=354.7
/ codon_start=1
gene 29896..33000
/ rbs_motif="AGxAGG/AGGxGG"
/ uscore="3.06"
/ rscore="8.45"
/ sscore="8.03"
/ locus_tag="3A_38"
/ conf="100.0"
/ ID="3A_38"
/ cscore="102.54"
/ partial=0
/ tscore="-3.48"
/ gc_cont="0.409"
/ rbs_spacer="11-12bp"
/ start_type="GTG"
/ score=110.6
CDS 29896..33000
/ rbs_motif="AGxAGG/AGGxGG"
/ uscore="3.06"
/ rscore="8.45"
/ sscore="8.03"
/ locus_tag="3A_38"
/ conf="100.0"
/ ID="3A_38"
/ cscore="102.54"
/ partial=0
/ tscore="-3.48"
/ gc_cont="0.409"
/ rbs_spacer="11-12bp"
/ product="RNA helicase"
/ start_type="GTG"
/ score=110.6
/ codon_start=1
gene 33156..33872
/ rbs_motif="AGGA"
/ uscore="4.93"
/ rscore="7.92"
/ sscore="15.92"
/ locus_tag="3A_39"
/ conf="100.0"
/ ID="3A_39"
/ cscore="107.82"
/ partial=0
/ tscore="3.07"
/ gc_cont="0.407"
/ rbs_spacer="5-10bp"
/ start_type="ATG"
/ score=123.7
/ codon_start=1
CDS 33156..33872
/ rbs_motif="AGGA"
/ uscore="4.93"
/ rscore="7.92"
/ sscore="15.92"
/ locus_tag="3A_39"
/ conf="100.0"

```

|      |                                                                                                                                                                                                                                                                                                                                                                                                                                                                                                                                                                                                                                                                                                                                                                                                                                                                                                                                                                                                                                                |
|------|------------------------------------------------------------------------------------------------------------------------------------------------------------------------------------------------------------------------------------------------------------------------------------------------------------------------------------------------------------------------------------------------------------------------------------------------------------------------------------------------------------------------------------------------------------------------------------------------------------------------------------------------------------------------------------------------------------------------------------------------------------------------------------------------------------------------------------------------------------------------------------------------------------------------------------------------------------------------------------------------------------------------------------------------|
|      | <pre> /ID="3A_39" /cscore="107.82" /partial=0 /tscore="3.07" /gc_cont="0.407" /rbs_spacer="5-10bp" /product="hypothetical protein" /start_type="ATG" /score=123.7 /codon_start=1 33899..35227 /rbs_motif="AGGAG" /uscore="2.98" /rscore="11.88" /sscore="18.92" /locus_tag="3A_40" /conf="99.99" /ID="3A_40" /cscore="240.43" /partial=0 /tscore="3.07" /gc_cont="0.4" /rbs_spacer="5-10bp" /start_type="ATG" /score=259.4 /codon_start=1 33899..35227 /rbs_motif="AGGAG" /uscore="2.98" /rscore="11.88" /sscore="18.92" /locus_tag="3A_40" /conf="99.99" /ID="3A_40" /cscore="240.43" /partial=0 /tscore="3.07" /gc_cont="0.4" /rbs_spacer="5-10bp" /product="UDP-N-acetylmuramate--alanine ligase" /start_type="ATG" /score=259.4 /codon_start=1 35313..35780 /rbs_motif="None" /uscore="0.05" /rscore="-3.27" /sscore="-0.15" /locus_tag="3A_41" /conf="100.0" /ID="3A_41" /cscore="49.47" /partial=0 /tscore="3.07" /gc_cont="0.404" /rbs_spacer="None" /start_type="ATG" /score=49.3 /codon_start=1 35313..35780 /rbs_motif="None" </pre> |
| gene |                                                                                                                                                                                                                                                                                                                                                                                                                                                                                                                                                                                                                                                                                                                                                                                                                                                                                                                                                                                                                                                |
| CDS  |                                                                                                                                                                                                                                                                                                                                                                                                                                                                                                                                                                                                                                                                                                                                                                                                                                                                                                                                                                                                                                                |
| gene |                                                                                                                                                                                                                                                                                                                                                                                                                                                                                                                                                                                                                                                                                                                                                                                                                                                                                                                                                                                                                                                |
| CDS  |                                                                                                                                                                                                                                                                                                                                                                                                                                                                                                                                                                                                                                                                                                                                                                                                                                                                                                                                                                                                                                                |

```

/uscure="0.05"
/rscure="-3.27"
/sscore="-0.15"
/locus_tag="3A_41"
/conf="100.0"
/ID="3A_41"
/cscore="49.47"
/partial=0
/tscure="3.07"
/gc_cont="0.404"
/rbs_spacer="None"
/product="GNAT family acetyltransferase"
/start_type="ATG"
/score=49.3
/codon_start=1
gene 35880..37856
/rbs_motif="GGA/GAG/AGG"
/uscure="-2.51"
/rscure="-1.46"
/sscore="0.31"
/locus_tag="3A_42"
/conf="99.99"
/ID="3A_42"
/cscore="247.34"
/partial=0
/tscure="3.07"
/gc_cont="0.375"
/rbs_spacer="11-12bp"
/start_type="ATG"
/score=247.7
/codon_start=1
CDS 35880..37856
/rbs_motif="GGA/GAG/AGG"
/uscure="-2.51"
/rscure="-1.46"
/sscore="0.31"
/locus_tag="3A_42"
/conf="99.99"
/ID="3A_42"
/cscore="247.34"
/partial=0
/tscure="3.07"
/gc_cont="0.375"
/rbs_spacer="11-12bp"
/product="aminodeoxychorismate lyase"
/start_type="ATG"
/score=247.7
/codon_start=1
gene 38000..38386
/rbs_motif="None"
/uscure="-0.38"
/rscure="-3.27"
/sscore="-7.29"
/locus_tag="3A_43"
/conf="100.0"
/ID="3A_43"
/cscore="77.3"
/partial=1
/tscure="-3.65"
/gc_cont="0.442"
/rbs_spacer="None"

```

```

CDS
    /start_type="TTG"
    /score=70.0
    /codon_start=1
    38000..38386
    /rbs_motif="None"
    /uscore="-0.38"
    /rscore="-3.27"
    /sscore="-7.29"
    /locus_tag="3A_43"
    /conf="100.0"
    /ID="3A_43"
    /cscore="77.3"
    /partial=1
    /tscore="-3.65"
    /gc_cont="0.442"
    /rbs_spacer="None"
    /product="transcription elongation factor GreA"
    /start_type="TTG"
    /score=70.0
    /codon_start=1

```

```

BASE COUNT    11792 a    7062 c    8213 g    11319 t
ORIGIN

```

```

1 gaaacagcta tgaccatgat tacgccaaagc tatttaggtg agactataga atactcaagc
61 ttgcatgcct gcaggctcgac tctagaggat ccacttact ggggaattga ttgcacctag
121 tgttgcagta ggcgataagg tccttggtga aaatggtaca ggtgtcagtg ttaaagacgg
181 agaagattcc gtttcaatta tccgtgaagc agatatatta gcagtcctag cttaaattct
241 tgctaatacag atataaatta agataaagaa ggagtgaagta attatggcaa aagatattaa
301 attttcatca gatgcacgtg cagcaatggt tcgtggtggt gatactttag ctgataccgt
361 taaggtaacg cttggcccta aaggctcgtaa tgttgttttg gaaaaggctt ttggttcacc
421 acttatcact aatgatggtg tgacaattgc taaagaaatt gaacttgaag atcattttga
481 aaatatgggt gccaaagctcg tcagcgaagt ggcttcaaaa actaatgata ttgccggtga
541 cggaacaact acagccactg ttttgacaca agctattggt cgtgaggggc taaaaaatgt
601 aacagctggt gctaataccaa tcggtatccg tcgtgggatt gaagcagctg tagctgcagc
661 tgtggaagag cttaaagtca ttgctcaacc agttgctaata aaggaagcta ttgctcaagt
721 tgctgcggtt tcactctcgct ctgaaaaagt tgggtgaatac atttcagaag caatggaacg
781 cgttggtaata gatggtgtta tcactattga agagtctcgt ggtatggaga cagaactcga
841 agtggttgaa ggtatgcaat ttgaccgtgg atatctttct cagtacatgg ttactgataa
901 tgaaaaaatg gtcgcagatc ttgaaaatcc atatatctct gtgactgaca agaaaatttc
961 aaatatccaa gatattcttc cactcttgga agaagtgctt aagaccagtc gtccactttt
1021 gattattgct gacgacgtgg ctggtgaagc tcttccaaca cttgttctta acaaaattcg
1081 tggaaccttc aatgtcggtg ctgttaaggc gcctggcttt ggtgaccgtc gtaaagcgat
1141 gttggaagac attgctgtat tgactggagc aactgttatt actgaggatc ttggtcttga
1201 acttaaggat gcaactatgg aatcacttgg tcaggcttcg aaagtaactg tggataagga
1261 tagtacagtt atcgttgaag gagcaggaag cgcagaagca attgctaacc gtgttaacct
1321 cattaatact caattggaaa caacaacatc tgaatttgac cgtgaaaaac ttcaagagcg
1381 tttggctaaa ttgtcaggtg gtgttcagct tattaagggt ggtgcagcca cagaacagc
1441 tcttaaagaa atgaaacttc gtatcgaaga tgctctcaat gctactcgtg ccgctgttga
1501 agaaggtata gtagctggtg gtggtacagc cctagttaac gtcattgcta aggttgctga
1561 acttgatctt gaagggtgacg atgctacagg acgtaatatt gtcctccgtg ccttggaaga
1621 acctgttcgt caaattgctt ataatgccgg ttatgaaggt tcagttatca ttgataaatt
1681 gaagaatagc ccagttggta caggatttaa cgctgccaat ggcgaatggg tagatatggt
1741 tgaatcagga atcattgacc cagttaagggt aacacgttca gcccttcaaa atgctgcttc
1801 agtagctagt cttatcttga caacagaagc agtcgttgcc gacaaacctg aacaaaaggc
1861 tccagcagcg ccagctatgg atccaggaat gatgggttac taagatttaa gaaagaaaaa
1921 aacctaggag aagtcgagaa ataaactgca ccccaaaagt tagacaaaaa aatctacttt
1981 tggggtgttt ttattatgaa actaacttat gaagataaag ttcaaataata tgaattgaga
2041 aatcaaggct aaaccttcaa ccaactttca aaacgatttg gtgtggatgc ttctggatta
2101 agatatatga cgagattgat tgaacgttac ggaatagaaa ttatcaagaa aggtaagaat
2161 cgttactatt caccagaatt aaaacaagaa atgattgata aagtgtact tgaagattgt
2221 tctcaacaaa gtgtttgcct ggactatggc ctctcaaatt aagggttgct taacaattag
2281 atagcacaat acaagaaaaa tgggtatact tttcttgaga aaagaagagg gagagtacct

```

|      |             |             |             |             |             |             |
|------|-------------|-------------|-------------|-------------|-------------|-------------|
| 2341 | aaaatgggga  | gtaagccaaa  | gaagaaacct  | gaagagatga  | cagagttaga  | acgtcttcaa  |
| 2401 | gcagaaaatg  | agtacctgag  | agtgagaaat  | gctatttctaa | aaaagttgag  | agaactccga  |
| 2461 | ttgaggggacg | aaaggggagca | agaagaaaaa  | cagaaattgt  | tcaaggatta  | gtaacagagt  |
| 2521 | ttccttttaga | tatccttcta  | aacattatca  | aacttgctcg  | ttcaacctat  | tattagcact  |
| 2581 | taaagaaaact | gaatcaagta  | gataaaaaatc | aatctatcaa  | agtggaaata  | caagccattt  |
| 2641 | atgatgaaca  | taggggaaat  | tacggatatc  | gtcgaataac  | tcttgaattg  | aggaatcgtg  |
| 2701 | gtttttgtagt | gaaccagaag  | aaggtccaac  | gtctgatgaa  | gctccttggt  | ttaagttccc  |
| 2761 | aaattcgtcg  | taaacgcaag  | tattcttcat  | accaaggaga  | agttggcaag  | aaagcagatg  |
| 2821 | accttagtga  | ccaaggttga  | caataccaac  | atcagtatta  | tcatcaattt  | ttagaggata  |
| 2881 | aagggaccca  | accgtccatg  | tcacgtaagg  | ggaaaaatag  | tccagataat  | ggtatgatgg  |
| 2941 | agtccttctt  | tggcattctt  | aagtctgaga  | tatttttatgg | ttacgagaag  | acgttttact  |
| 3001 | cacttgagca  | attggaacaa  | gctattgtag  | actatatgta  | ttattacaac  | aacaaacgca  |
| 3061 | ttaaagtaaa  | attaaaagga  | cttagtcctg  | tgcagtacag  | aactaaatcc  | ttttggataa  |
| 3121 | attagttgtc  | taactttttg  | gggtcagtac  | aaaacttttt  | ctgaattttt  | ttttattagt  |
| 3181 | tattgttaat  | taatgaaaag  | ggttaaacad  | atcagaactt  | ccttgtttac  | ctgacatctg  |
| 3241 | catcataatt  | tgttgctatc  | tagtgcgttc  | tgcttcctta  | ttcgtattga  | tagaaataat  |
| 3301 | aagcaagatg  | atctatccaa  | tgaaggtcca  | gcttaacagt  | attgagaaaa  | gaaagttatg  |
| 3361 | ccattttcttt | tctgttttgt  | ttagaagtgc  | tggtaggatg  | tcaataatga  | ttgctggtag  |
| 3421 | accacacaatc | aaagtccaaa  | atgtccaaacc | taatcccatg  | ctagaatcgt  | ctccaataac  |
| 3481 | tccaagtaag  | aaccatccaa  | gagtccaaag  | gataactggt  | atggtagcga  | tggctatcat  |
| 3541 | gatgaggttt  | gttttgagatt | tcttttctgg  | cttcttccaa  | gcctcattaa  | gaagtgcgtg  |
| 3601 | ttgtttgtag  | gaagccttgca | tgagcctgtt  | cggcaaagga  | atttaaaggc  | ttattagtag  |
| 3661 | tgtcttgtag  | tggattttatt | tgttcttgaa  | agttggctgt  | tggagcttct  | tgacctatgt  |
| 3721 | taggagtttg  | gaaagtttgt  | ctttcatcga  | tactagaatc  | atccaaggat  | tcttcagtga  |
| 3781 | catcataatt  | gtcaacatca  | tttttgacag  | tttctacagt  | ctctgctgat  | ggttcagggt  |
| 3841 | ctgtatgttc  | aacagtttct  | gagttttgctg | tcttttctac  | agtcctcttt  | tgtgagagtt  |
| 3901 | ttttttgttg  | ctttgacagt  | ttgtttggga  | gtttctcaga  | caaactcgcc  | tcgattggct  |
| 3961 | gcttcagcca  | tttcttggtg  | acttggttta  | cgtccgtgga  | ctgcttgga   | aaaatcaatc  |
| 4021 | caatcttggt  | gtttcatata  | gttaaactcc  | atgtgtttcg  | attataaatt  | ttgatgctta  |
| 4081 | caattatagc  | aatagtgtaa  | gggatatgca  | atgggagttg  | gataggacag  | tttatttctc  |
| 4141 | tataatcttt  | ttgtcactaa  | agatgggaaa  | gagaaagaaa  | taggttaaga  | tatagatcac  |
| 4201 | gagaggatat  | atcagtggtg  | tatagtccca  | ggctccttgc  | caatctaggt  | gtaagagtct  |
| 4261 | aacactagca  | cgtgtcagac  | ctgcgcctcca | ccccttgagt  | ccaaatgggt  | ttaggataag  |
| 4321 | gttgagtggt  | gttggggagat | gtaaaaggta  | gactccataa  | attgccatta  | aaactaagag  |
| 4381 | atataatcta  | aaaaaaaacgt | tgggtggtagg | cccgcaggcg  | tgtgaaatag  | tttttcatta  |
| 4441 | cccaataaca  | gcaaaaagtt  | tttgagcggt  | tgattggcga  | gtagcatcca  | tgatgagaaa  |
| 4501 | ccagtcaacg  | attgaccaga  | taccacaacc  | accacatgtc  | aaaagtttac  | cgataccaag  |
| 4561 | accaacttgt  | cccaacataa  | agcggtcgat  | tccaagagaa  | ccaccaaaaga | gtgagatgac  |
| 4621 | aagcatcatt  | gtaggatctt  | ggaagctgat  | tgagtaaagc  | agtgaaagtt  | gttgttcagg  |
| 4681 | aagtgcctca  | aggcgttggc  | ggatgtactg  | cacttgttct  | gttgggaaat  | acttagcggt  |
| 4741 | aattgctagc  | cattgatcga  | ccggattcat  | aattaaaatac | tcctaaaatt  | ttaaattata  |
| 4801 | cgtaaaggat  | aacataatgt  | aaaggagatt  | tcaaggtagt  | caaggctttc  | gaaatcaata  |
| 4861 | aaagcaactt  | atttgcaagg  | ttccgctgtc  | ttataacgag  | aagatcatta  | ggataatcct  |
| 4921 | ttcgcactat  | gtttgagagt  | gagtttgctt  | ttatgatttg  | tgattttctca | acacttgctt  |
| 4981 | aaaactttct  | gatttaacct  | taacagttag  | tttttcgagt  | gttaagggggt | gagtgaagct  |
| 5041 | aaggagtggt  | gcgtgtagct  | tgagtctgac  | tgttggtgta  | tgactgtaaa  | gtgggtcccc  |
| 5101 | cagaatagca  | tgaccgtgat  | gggacagatg  | cacacgaatt  | tgggtgagttc | tgccggtttt  |
| 5161 | tagttggcag  | ttgaccagac  | tggctccttc  | aaaggttttg  | agacgtgtga  | cggttggtata |
| 5221 | cgcactctgc  | ccttttctgag | gatccaccac  | ccgtttttcta | cgatcgtggc  | ggtcgcgtcc  |
| 5281 | aatcttggtc  | ttataaacag  | ttttcttggt  | ctgaaattta  | ccttcagtca  | atgccagta   |
| 5341 | ttgacgctga  | atcatcttat  | cttctaaaag  | ccggttaaga  | attggcagga  | taaacggatt  |
| 5401 | tttagcgaaa  | agcacagctc  | cactagtttc  | catatctagt  | cgatgaacga  | cgtaacagggt |
| 5461 | ttgcccacaa  | taagccgaaa  | catggttaag  | aagagcgatt  | tctgtgggtt  | tattgccatg  |
| 5521 | cgtcttcatt  | ccttcaggct  | tattgaccac  | gatgatatgc  | gaatcctcat  | agagaggctt  |
| 5581 | taccaaattg  | gcattctcca  | tagggatagt  | tttattagga  | tagtcctctg  | tgtcaaagggt |
| 5641 | caggctaate  | ctatcacctt  | ctttaacagg  | actctgccaa  | ttaatagttt  | ctccattgat  |
| 5701 | aaggacatgt  | tttttcgtgc  | gtaggaaatg  | acgaatctta  | cgagggaatga | ggagtttggt  |
| 5761 | ttctagtaat  | tctttgacag  | ttgttgacag  | gtagggattg  | ataatttcta  | cgtgtaaagt  |
| 5821 | catagtttca  | ttatatcatg  | aacgttttaga | agaggacaga  | acctgtaaaa  | acttggtata  |
| 5881 | ataggtttat  | gacacttttt  | gataatctaa  | aaaacaaact  | ttttaaagaa  | gaaactagcg  |
| 5941 | ggaagggtaa  | ggaatcccag  | cctgctggaa  | aatcgaagga  | tttacaagat  | aggataaaag  |

|      |             |             |             |             |             |             |
|------|-------------|-------------|-------------|-------------|-------------|-------------|
| 6001 | gtcttttttgc | caagaagcct  | gatgaagttg  | aacaagccgt  | tgaagaactt  | gacatgtcac  |
| 6061 | gagaaagcca  | agagacttca  | cgttaccaac  | gttctaagca  | aaagaaacct  | attgacacga  |
| 6121 | ccaaaccctt  | aggtaagggt  | cgggctttct  | tgagcaagtt  | cactctttcg  | ccaagaaatc  |
| 6181 | ctattcgccg  | tttctggcgt  | cgctatcata  | ttggtaaaat  | tctctttatc  | ttggtagccg  |
| 6241 | tgttggttct  | gacagtaggc  | tcctatctct  | tctatatcgc  | taagacgacc  | aatgtctcag  |
| 6301 | atcttcagga  | tgccttgaag  | gctactacgg  | ttatctatga  | caaagaaggc  | aatcaagctg  |
| 6361 | gttcaactgtc | agggcaaaaa  | gggacctatg  | tggagctaga  | tgctattagt  | gatagcttag  |
| 6421 | aaaatgccgt  | cattgcaacg  | gaggatcgta  | cctttttacaa | aaatagtggg  | attaacgtca  |
| 6481 | aacgtttcct  | cctagccatt  | gtttctatgg  | gccgatttgg  | tggtggttcg  | accatcacac  |
| 6541 | aacagttggc  | taaaaatgcc  | tttttgactc  | aggaacagac  | agtaactcgt  | aaggccaagg  |
| 6601 | aattctttct  | ttcttttgaa  | ctaaccaaga  | aatacagcaa  | gcaagaaatc  | cttaccatgt  |
| 6661 | atctcaataa  | tgcctacttc  | ggaaacggtg  | tttgggggtg  | tgaagacgcc  | agccaaaaat  |
| 6721 | actttgggac  | aagtgtctgcc | aatctaacgg  | tggatgaggc  | agcgacactt  | gcaggtatgc  |
| 6781 | ttaagggacc  | tgaaatttac  | aatccgattg  | ataatatcca  | aaatgcaacc  | aaccgccgaa  |
| 6841 | acactgtcct  | tgccaatatg  | gtagatgatg  | agaagttgag  | tcaagctgat  | gctgatagtg  |
| 6901 | cagctggagt  | tgatatggct  | agtcgcttgg  | ttgatactta  | tcaagggact  | ggtgatgact  |
| 6961 | ataggtatcc  | gtcttacttt  | gatgtgtcca  | ttgaagaagc  | tactaagact  | tatggcttga  |
| 7021 | gtgaggatga  | aattgttaaa  | aatggctaca  | aaatctatac  | agagatggat  | gccaaactcac |
| 7081 | aggctaatat  | gcagcagact  | tatgaaaata  | gttatctctt  | tcccacgtca  | gaaagtgatg  |
| 7141 | gtagcacagc  | ccagtcagct  | agtgtagcac  | ttgatccatc  | aactggagcg  | gttcgtgggt  |
| 7201 | tggtaggtcg  | tgtaggtggt  | acaggtgata  | caaccttccg  | taattttcaac | tatgcaaccc  |
| 7261 | aagggaagcg  | tagtcctggt  | tcgacaatca  | aacctttggt  | ggtttatgct  | ccagctctgg  |
| 7321 | cttcaggggtg | gagcatcaat  | aaggacctac  | ccaatacgcc  | aattgattac  | aatggctata  |
| 7381 | ccccaaccaa  | ctatggtggt  | attgagactg  | atgatgtgcc  | catgtatcaa  | gctttggcca  |
| 7441 | actcttacia  | tattccggca  | gtttatctct  | ttaaccaaat  | cggatatacaa | aaagggatta  |
| 7501 | gttacgggtca | gaaatttggt  | cttaactttg  | ataatgttcc  | agaagaatta  | gggattgcac  |
| 7561 | tcggtgggtg  | tgtgacagct  | agtcctctac  | aaatggctca  | ggcttatgct  | acctttacca  |
| 7621 | atggtgggga  | gatgaataca  | gcttatttta  | tcactaaaat  | tgaaaatgct  | agtggtgata  |
| 7681 | tcattgctac  | ccatagtaag  | aagtctaaac  | gtattatcag  | ccagctctgta | gctaaccaga  |
| 7741 | tgactagcat  | gatgtctcgt  | accttctcaa  | atgggtccgc  | tgtaaagtcc  | aactacacgg  |
| 7801 | gttacactat  | ggcaggtaag  | acaggtactg  | ttcaggccga  | gtttaacaaa  | gatttgacca  |
| 7861 | gtgaccagt   | ggtaattggc  | tatactcctg  | atgtggttat  | aacgacttgg  | attggttttg  |
| 7921 | ataagactga  | cgagaatcac  | tacttaacag  | gagcaagctc  | aggaacggct  | tcaactatth  |
| 7981 | tcagctatat  | cgctgcagat  | gttttgccaa  | atacaccagg  | taatgagttt  | accgttgaaa  |
| 8041 | atgcctatgc  | ggctgatggt  | caaaccttag  | attatacagc  | aaatccaaac  | gattcacgta  |
| 8101 | atagcaataa  | taagtcatgg  | acagacaagg  | cttcagacgt  | tgtcaatgat  | gtaaaagatc  |
| 8161 | aagcaagcag  | cctatgggat  | aagctctcag  | actccttctc  | aggtctattc  | agatagcttg  |
| 8221 | tcaattaagt  | ttaaaagtgg  | taagataaaa  | agaacggagg  | cgttatggca  | cagaaaaaag  |
| 8281 | caagcctagc  | gtgtgcagat  | tgtgggaacc  | gaaactactc  | gattagtgtt  | agtagcactc  |
| 8341 | ccaaaccaac  | acgactagaa  | gtgaacaagt  | tttgcaaaaa  | ttgtaaaaaa  | tataccttgc  |
| 8401 | ataaagaaac  | aagataggag  | acaccgtgag  | acaaaccgga  | agtattttca  | aagtcttgaa  |
| 8461 | agacacgact  | tggccagagc  | gtaaacaacg  | ctggcacgat  | tttagttcag  | ttcttgagta  |
| 8521 | tactgcattc  | ttcactgtca  | tcactatgct  | gtttgatgaa  | ttgttgagtc  | gcactatgtc  |
| 8581 | agcactgatt  | aactttttct  | aaagaaaaca  | taaaaagagt  | gggcatgctt  | gctctttttt  |
| 8641 | gtataataaa  | atgcagataa  | aagcgagaac  | aagggcctcc  | aggctttttt  | attacgcttt  |
| 8701 | gattataaac  | ataggcattc  | atttacattt  | aacgcttgcg  | cctcgaatat  | tgatggctcat |
| 8761 | gtttaaatgt  | cattttagaac | aaagaaagga  | atcctaaaaat | gctagattca  | ttcgacaagg  |
| 8821 | gctggttcgt  | ccttcaaacg  | tattcaggat  | acgaaaaataa | agttaaagaa  | aatctttttg  |
| 8881 | aacgagctca  | aacttataac  | atgcttgaaa  | atatcttgcg  | tggtgaaatc  | ccaactcaaa  |
| 8941 | ctgtcaatgt  | tgagaaaaac  | ggtaaagtta  | aagaagtggg  | agaaaaaccgc | ttccctgggt  |
| 9001 | acgttcttgt  | tgagatggta  | atgacagacg  | aagcatgggt  | tggtgttcgt  | aatactccaa  |
| 9061 | acgttactgg  | tttcgttggt  | tcacacggaa  | accgttctaa  | accaacacca  | cttttggaag  |
| 9121 | aagaaatccg  | tcaaactctg  | atttcaatgg  | gtcaaacagt  | tgatgtcttt  | gatacgaata  |
| 9181 | tcaaggtttg  | tgacgtgggt  | caaactatcg  | atgggtgcct  | tatggggcaa  | gaaggccgtg  |
| 9241 | ttgtcgaaat  | tgaaaacaac  | aagggttaaaa | tcatgattaa  | catgtttggt  | tcagaaacag  |
| 9301 | ctgctgagct  | tgaactctac  | caaactcgct  | aacttttaaaa | tagtcaaaaa  | ggttggaacc  |
| 9361 | aggagcttca  | acctcgtaag  | actatctcat  | taaacatggg  | ggagagacta  | gaatctagat  |
| 9421 | ttttaaatth  | agttctgtgt  | cactcccttt  | ttctaacgga  | tgatgaatta  | taaacattht  |
| 9481 | tacgataaga  | ttagcgggtc  | attgcgtcct  | tatgctaagg  | tcttggggagg | attgaacaag  |
| 9541 | gctataacaa  | ggactttttt  | cctgcttttt  | cctatattht  | ttatthttggt | ttggctgagg  |
| 9601 | catggctggt  | ttgttcttht  | tacgacagt   | cttattatgg  | gagaaggctt  | ttttctgctt  |

|       |             |             |             |             |             |             |
|-------|-------------|-------------|-------------|-------------|-------------|-------------|
| 9661  | tctcttggtc  | gtagccttta  | taatcgccca  | cgcccttata  | agacctggga  | cattcagcct  |
| 9721  | cttattaaaa  | aggatagctt  | tggcaagtca  | tttcttagcc  | gtcatgtttt  | ttcagcaacg  |
| 9781  | accattgccca | tgtttacctt  | attgcttaat  | ccgtggctag  | gtgggactat  | gctttttctc  |
| 9841  | gcagcaatth  | tggctatctt  | gcgcgtgcta  | ggtggtgttc  | attatcctag  | tgatgttttg  |
| 9901  | gcaggctatg  | tcattggaat  | tcttggtggc  | ctccttcttt  | acctttagaa  | atthtttggtc |
| 9961  | ttcttcgaga  | gaggagggct  | tttttcattg  | aaaaaagaaa  | aggacctttt  | ggggaccttt  |
| 10021 | tctcttggtc  | taaaattcga  | gttggcgatt  | aaagggtgtt  | cccaccattc  | gatattggct  |
| 10081 | tagtttaaaa  | catgctctat  | gatagcttgt  | gttactccat  | gttgatcatt  | tgaggcagtc  |
| 10141 | actagatttt  | cagacttctt  | gactccctca  | ggtgcattga  | ccatagcaac  | tcctaggcta  |
| 10201 | gccagagcga  | gcataggact  | atcgttgaaa  | ttatcaccaa  | tagtcataat  | ctgttcaaga  |
| 10261 | ggaatgtcat  | aatatthggc  | aacctcaagg  | agagcatgtt  | ctthtagaaac | gtgcttggca  |
| 10321 | gtgacttcta  | agtagttatc  | gttgataaag  | tagaaggctg  | tctgtggaaa  | atccatgctt  |
| 10381 | aggagtthtt  | ggtggaggtc  | ctggataaac  | ttcaggctta  | tcaatcaaca  | atagcttgtg  |
| 10441 | gatagaaggc  | tttgaatctg  | agacagtgtc  | ttggagtthc  | ttataaatag  | gagaatcacc  |
| 10501 | cgtgatactt  | gcttccaact  | gagaccattt  | gtthtagttg  | ttggtaatcc  | aatccttgcc  |
| 10561 | agagtagata  | ttcacagaaa  | cacttgata   | gtthgtggat  | aagtagttaa  | aaaatthtcg  |
| 10621 | agthttcagaa | ttatccacag  | gatgttctat  | gatagtaga   | tcacctcaa   | gtactaggcc  |
| 10681 | ccgtgttagc  | aggcgatagg  | attgtcatga  | agtcctagtt  | tatgagcaat  | tggttgcat   |
| 10741 | cctagtgagg  | aacgggcaga  | agctaaaaca  | aaaggatatc  | tcgcctthtc  | aagctctagc  |
| 10801 | atgacttcaa  | tcagttgctc  | atctacctgg  | tggttactag  | tgaaaatagt  | cccatcaata  |
| 10861 | tcgctgataa  | tcaaacgaat  | tttattaata  | atcgctatcc  | tttccatcat  | ataaaattat  |
| 10921 | tactthtatc  | ttaagtgttt  | caactatata  | agactcaggc  | tccttatctg  | taatccagta  |
| 10981 | ttcaaagtcc  | tcaagthttac | ccaagatata  | thtggaatgc  | thttcatatt  | tgctagattc  |
| 11041 | agcaataagt  | atcttagthc  | tagtagthttg | caaggctagc  | tgthtgacgg  | caacgtcttc  |
| 11101 | ttcatctthc  | aagctaacca  | atccttgact  | gagactagcc  | gctccaaaga  | aggctaagtc  |
| 11161 | aaattgtaga  | tgthgcaaga  | tctgtgcttc  | gtgaatcgag  | tagtagaagc  | ggtthtttagt |
| 11221 | gtagaatttg  | cctcccaaga  | gctgaaaatc  | aatccctthc  | ttaccactta  | ggaccaaggc  |
| 11281 | attatccaag  | gagtgaggag  | aaacagtgc   | gttcttagth  | aatthctgtg  | aaacttcaag  |
| 11341 | catcaaggta  | gaaacatcga  | aaaaaagtag  | agattgttct  | ttgatgaagc  | taagcgccag  |
| 11401 | gtctgccatt  | thtttcttat  | cttctgtgag  | tcctthctga  | cgthcttata  | agccaagaac  |
| 11461 | actggtgtth  | ttaactggaa  | gaataccgca  | ccatgggtac  | gttgagccag  | atthctctgg  |
| 11521 | ctgagacaat  | caaaatctct  | tctgacggta  | tatttggaat  | ctcctaattc  | atcaaccatt  |
| 11581 | tctthtgacag | ataggthttcc | tcgctctthc  | aagagcatca  | aaatthctct  | aaatcgthgt  |
| 11641 | tcctgataca  | tgagtcacct  | gctthctgat  | attagtatag  | tatctthtta  | cgthththgt  |
| 11701 | atataaaaa   | gcaaaaaaac  | gcaactaag   | ccaggthcaa  | gttacctcgt  | aaactthctc  |
| 11761 | tactatctth  | aaaaatcctt  | caaaatgct   | ataatagaag  | cattacgaat  | attggagaga  |
| 11821 | aaccatgagt  | thttacaatc  | ataaagaaat  | cgagcctaag  | tggaaaaaat  | actgggctga  |
| 11881 | ccatcacaca  | thtaagacag  | gaacagatgc  | ttcaaaacct  | aagththtat  | cgcttgacat  |
| 11941 | gtthcccttac | ccatctggag  | cggtctthca  | cgtaggacac  | ccagaaggct  | acacagcgac  |
| 12001 | agatatcctt  | agccgthttca | agcgtgccc   | aggctataac  | gtcctthcacc | caatgggatg  |
| 12061 | ggatgcttht  | ggtthgcctg  | cagagcaata  | tgctatggat  | actggtaatg  | atccagctga  |
| 12121 | ctthtacagcg | gaaaatattg  | ccaactthca  | acgtcaaatc  | aacgcgcttg  | gctthctthta |
| 12181 | cgactgggat  | cgtgaaatca  | acacaacaga  | thcaaaactac | tataagtgg   | cgagtggtat  |
| 12241 | thttaccaag  | ctthtacgaa  | aaggtthggc  | ttatgaggcg  | gaagtaccag  | taaactgggt  |
| 12301 | tgaggacta   | ggaacagcta  | tcgcaaatga  | agcagtcctt  | ccggacggaa  | ctcttgagcg  |
| 12361 | tggtggctat  | ccagthgtcc  | gtaaaacatg  | gcgccaatgg  | atgctthaaa  | ctactgctta  |
| 12421 | tgagagcgga  | ttgctcaatg  | acttggtatga | gttggtatgg  | ccagagtcta  | tcaaggacat  |
| 12481 | gcaacgcaac  | tggtatggta  | aatcaactgg  | tgccaatgtc  | acctthcaaag | tgaaaggtag  |
| 12541 | tgacaaggaa  | thcacctgct  | thacgacag   | thccggatacc | ctththcggtg | cgacctthcac |
| 12601 | tgththtggtg | cctgagcatg  | acttagtaga  | tgctatcaca  | agtcctgaac  | aagctgaggc  |
| 12661 | tgtagctaac  | tacaaacacc  | aagctagcct  | taaatcagac  | thggctcgta  | ccgacctthgc |
| 12721 | caaggaaaaa  | acaggggtth  | ggactggagc  | thtatgctata | aacctgtthta | acggtagaga  |
| 12781 | aattccaatc  | tggtatggcg  | actacgtthc  | cgctagctac  | ggaacagggtg | cagthtatggc |
| 12841 | cgtacctgct  | cacgatgagc  | gtgactggga  | atthtgctaaa | cagththggtc | thccaatcgt  |
| 12901 | agaagtactt  | gaagggtggca | acgttgaaaga | agcagctthac | acagaagacg  | gtcctcatgt  |
| 12961 | caactctgac  | thctthgaacg | ggctthaaaca | agaagaagct  | atthgctaaaa | thgtagctthg |
| 13021 | gttggaagaa  | aaaggctthtg | gtcaagaaaa  | aatcactthac | cgthctcccg  | actggctctt  |
| 13081 | tagccgtcaa  | cgthtactggg | gtgaaccaat  | cccaatcatt  | cattgggaag  | atggcactthc |
| 13141 | aacagccgtt  | ccagaaagcg  | aattgacct   | tgtcttgcca  | gtaaccaagg  | acatccgtcc  |
| 13201 | thcaggtact  | ggtgaaagtc  | cattggctaa  | ctthgacagac | tggtthgaag  | tgactcgtga  |
| 13261 | agatgggtc   | aaaggctcgtc | gtgaaaccaa  | cacctagcca  | caatgggag   | gtthcaagctg |



|       |             |            |            |             |             |             |
|-------|-------------|------------|------------|-------------|-------------|-------------|
| 13321 | gtactacctt  | cgctatatcg | acccacataa | cacagaaaaa  | ttggcagatg  | aggacctcct  |
| 13381 | caaacaatgg  | ttgccagtcg | atatctacgt | gggtggtgca  | gaacacgccg  | ttcttcactt  |
| 13441 | gctttacgct  | cgtttctggc | acaaattcct | ctatgacctc  | ggtgtcgttc  | caactaaaga  |
| 13501 | accattccaa  | aaactcttta | accaaggaat | gatcttggga  | acaagctacc  | gtgaccaccg  |
| 13561 | tgggtgctctt | gtggcgactg | acaaggttga | aaaacgtgat  | ggttccttct  | tccatgtgga  |
| 13621 | aacaggagaa  | gagttggagc | aagcaccagc | caagatgtct  | aaatccctca  | agaacgtggg  |
| 13681 | taaccagac   | gatgtgggtg | aacaatatgg | tgctgatacc  | cttcgtgtct  | atgaaatggt  |
| 13741 | catgggacca  | ctcgatgctt | ctatcgcttg | gtcagaagaa  | ggcttggagg  | gaagtcgtaa  |
| 13801 | attccttgat  | cgtgtttacc | gtttgattac | aagtaaagaa  | atcgttgcgg  | aaaataatgg  |
| 13861 | tggctctgac  | aaagtttata | acgaaaccgt | taaactctgtc | actgagcaaa  | ttgagttgat  |
| 13921 | gaaattcaac  | acagccattg | ctcaactcat | ggtctttgtt  | aacgcggcta  | acaaggaaga  |
| 13981 | caaactctat  | gtggattatg | ccaaaggctt | tgtccaattg  | attgccccat  | ttgcgcctca  |
| 14041 | cttggcagaa  | gaactctggc | aaactcttac | agcaacaggt  | gagtcaatct  | cttatgtggc  |
| 14101 | ttggccaact  | tgggacgaaa | gcaaattagt | tgaagacgaa  | atcgaaatcg  | tcgtccaaat  |
| 14161 | caaaggaaaa  | gtccgtgcta | aactcatggt | cgctaaagac  | ctttcacgcg  | aagaattgca  |
| 14221 | agaagtggct  | ctggctgacg | aaaaagtcaa | agcagagatt  | gatggcaagg  | aaatcgtgaa  |
| 14281 | agtaattgcg  | gtaccgaaca | agcttgtgaa | cattgttgtg  | aaataaccaa  | tttgtttgct  |
| 14341 | gatttgcaac  | cttaaacagt | tccccaaact | gtttgagcta  | actaaactcc  | tttatatttg  |
| 14401 | ttgtgggata  | agaaatgaat | cctctagagt | tagactctgg  | aggatttttt  | actcttcttg  |
| 14461 | acaagaaaaa  | gatattttgt | aataccatta | acaaaaagaa  | ggaaactatg  | aataagaaag  |
| 14521 | aactgcataa  | gtttaataaa | tgttttaata | gctttgcttt  | agcctttgaa  | cggttgaaaa  |
| 14581 | aggaccagca  | taggaataag | tattgataaa | tcaatccaca  | ctattaatga  | agtcggtttg  |
| 14641 | attgacctaa  | taggtcggaa | tcagcctgtg | aatctagtga  | aattatctgg  | gttacttgaa  |
| 14701 | gtatcaagga  | gtgccgtcac | tcagagtgtt | agacgtttta  | tcaagaaaaa  | cctcgtttct  |
| 14761 | tttgaatttg  | cacaggataa | tgaaaaaaat | aaatatctga  | tattatctaa  | aaaaggggtt  |
| 14821 | gagggtttta  | acatccataa | agagcagcaa | gaacatattg  | aaaaagccat  | ttttttcaat  |
| 14881 | tttaagaaac  | tatagtgagg | aggaccttca | aatgggttatg | aaactgctgg  | atgatgttga  |
| 14941 | acaggtgtgg  | cgagaattac | cgtggaaaaa | atcacggtaa  | ttttaaaacc  | atattgttaa  |
| 15001 | tcataattaac | aaaaagagga | agatatgaat | atgcaaattg  | aacttatctc  | agcgtctgag  |
| 15061 | ttagcagatg  | aatcttttaa | tattgtcatc | aatgacttaa  | aaccaataga  | aacatagcga  |
| 15121 | gtcgaaatgt  | ttctatctga | ttattattgt | atcaatcctc  | ccatgcgttt  | agctcatgat  |
| 15181 | gttttatgga  | aatcaacagc | gacttttgta | tcagatacga  | atgggtattat | taatattctca |
| 15241 | caaaccat    | cttgttctgg | ttcgtatgaa | ggtatttcaa  | caatgggact  | attttttaat  |
| 15301 | gccaagccct  | tgaccaataa | gagaaagaaa | cttccaaact  | ctcttttctaa | aattccctta  |
| 15361 | ttagatcatt  | tttttgtggg | aatcaaaatt | atgcaaggaa  | atactgtcat  | tgcagagaga  |
| 15421 | actttcacia  | gacattatat | gagttcgcaa | attagtcatc  | aagatattta  | cgggaaacat  |
| 15481 | tttcaaggga  | gactctttta | tgataaaaag | gcaatcaaaa  | caccaagcat  | tgattattgt  |
| 15541 | gagcggtagt  | gaaggaagga | ttgaaaaggc | acagaatata  | gctcagcttc  | tctcttctag  |
| 15601 | aggttatatt  | tgtttagcaa | ttgcctactt | tggtttagag  | aggttgccaa  | aacatttgaa  |
| 15661 | acgtattcct  | ttagagtgcc | ttgtggaggc | aaagagttaa  | ctatgtcagt  | accctcaagt  |
| 15721 | agatagttaa  | agaattggaa | tctatggacg | gtctaaagga  | gcagagttag  | ttttagctga  |
| 15781 | ggagagcatt  | tttaatgacg | ttcaatgctt | ggtactaaat  | tccccctctg  | atgtgggtga  |
| 15841 | tgaaggaata  | atagggaaat | ggaactctca | tacttcttat  | tggacgcatt  | tgcaaaaaga  |
| 15901 | acttccctat  | caaaagtttc | gatttagaga | ttatttgttc  | agtaaaacttt | ttagaaaaga  |
| 15961 | tttccctaaa  | gattgctctg | ctaggataga | tatttggtcaa | atgcattcac  | caatcttgtt  |
| 16021 | gctcgaaagt  | accgttgatg | aaatatggga | tgcttcgtca  | gcaattgatg  | atattgtctc  |
| 16081 | acattataaa  | ggacactaca | ttacatttaa | aaaaatatca  | tgaacaggg   | cacatgttga  |
| 16141 | cgggtggctta | tcaaccaa   | catcgttatc | gaaaagattg  | gcgtttactg  | atgaaagaga  |
| 16201 | gtgaggattt  | ttggttggct | acgattcatt | tttttgatag  | gcatttgaaa  | aagcaataaa  |
| 16261 | agaagattat  | aaatatgcta | taatagtccc | aactaagata  | aaaacacagt  | tctggttggg  |
| 16321 | aagtccatac  | acgtagacga | gcctatcagt | aacctaaagga | tatgaataga  | aatgaagagt  |
| 16381 | agtccatcaa  | ggctactctt | tttcgtcaaa | agaaccatta  | gaaaaatcgg  | aaaatccaaa  |
| 16441 | caatatttaa  | ctttctgaaa | tgtggagaca | attgctcaaa  | aatgctataa  | tagtcagcat  |
| 16501 | aaacaagcta  | ttaataacaa | aaaataagta | cctattcgat  | tggaggaaat  | ccttgtataa  |
| 16561 | agatgatagt  | ttaaccttgc | acacggactt | gtatcaaate  | aatatgatgc  | aggctacttt  |
| 16621 | caaccaaggt  | attcacaata | aaaaggccgt | ttttgaagtt  | tatttccgtc  | aacttccgtt  |
| 16681 | taaaaatggc  | tttgctgtgt | tcgcaggctc | ggagcatatt  | gtcaactatc  | ttgaaaatct  |
| 16741 | gactttttca  | gaaactgata | ttgcttatct | gaaggattta  | ggctatccga  | aggattttct  |
| 16801 | ggactatctg  | gccaatctaa | aactcgagtt | gactattaat  | tcagcccttg  | agggtgattt  |
| 16861 | ggtatttgct  | aatgaaccga | tttttcaagt | ggaaggtccc  | ttggatcagt  | gtcagttagt  |
| 16921 | agagactgcc  | ctactgaata | tccttaatta | ccagattctt  | attgcgacta  | aggcagctcg  |

|       |             |             |             |             |            |             |
|-------|-------------|-------------|-------------|-------------|------------|-------------|
| 16981 | tattcgttct  | gttattgggg  | atgctcctct  | gttggaattt  | gggacacgtc | gtgccaaga   |
| 17041 | gatggatgca  | gcaatatggg  | ggacgcgtgc  | agccgtgatt  | ggtggtgctg | acgcaacttc  |
| 17101 | aatgtacgt   | gcaggtaaga  | ttttcgggat  | tcctgtttca  | ggtactcatg | cccatgcctt  |
| 17161 | tgttcaagct  | tatggaaacg  | attatgatgc  | ctttaaagcc  | tatgcatcta | ctcataaaga  |
| 17221 | ctgcatatth  | cttgtggata  | cctatgatac  | ccttaagatt  | ggtgttccaa | atgctatccg  |
| 17281 | tgtggctaaa  | gagctaggtg  | ataagatcaa  | cttcttgggt  | gttcgtcttg | attcaggtga  |
| 17341 | cttggcttat  | ctgtctaagc  | aggtccgtaa  | gcaactagat  | gcggttggtt | tccctgatgc  |
| 17401 | caagattttac | gcttcaaattg | accttgatga  | aaataccatt  | cttaacttga | aatgcagaa   |
| 17461 | ggccaagatt  | gatgtttggg  | gtgttggtac  | taatcttata  | acagcctatg | atcaaccagc  |
| 17521 | cttgggtgcg  | gtctacaaaa  | ttgtctcaat  | cgagaatgat  | cagggagtca | tgcaggatac  |
| 17581 | catcaagttg  | tccaacaacg  | ctgagaaggt  | ttcgacacca  | ggtaagaagc | aagtgtggcg  |
| 17641 | tattacgagt  | cgtgctaagg  | ggaaatcaga  | aggtgactat  | atcaccttcg | ctgacacgga  |
| 17701 | tgttaatgct  | ttagaagaaa  | ttaacatggt  | ccacccgact  | tacacctaca | ttaacaagac  |
| 17761 | tgtccgcgat  | tttgatgcgg  | tgccactttt  | ggtcccaatc  | tacgacaagg | ggcaactaat  |
| 17821 | ctatgatttg  | ccaagtcttg  | atgaaatcaa  | gaactatgcy  | actaagaaat | tggatgagct  |
| 17881 | ttggaatgag  | tacaagcgcy  | ttcttaacct  | ccaagattat  | ccagttgact | tggccaaaga  |
| 17941 | tgtctgggat  | cacaagatga  | ccttgattga  | taatatgcyt  | aagaaagccc | atgacttgtc  |
| 18001 | agagtaaaag  | gagaaaatat  | gactttgcaa  | gaaactatta  | ttgctcaact | aggagttaa   |
| 18061 | cctagcatta  | atccgaagga  | agagattcga  | aaatccggtg  | atthtttgaa | ggcctacatg  |
| 18121 | atcaaacatc  | cattccttaa  | aacatatggt  | ttagggtatt  | caggaggtca | gatttctaca  |
| 18181 | ttggctggtc  | gtcttgcgca  | acttgaggtt  | gaagaacttc  | gtgcagagac | agaaaaagac  |
| 18241 | tatcagttta  | tcgctattcg  | tttaccatat  | ggagttcaag  | cagatgaaga | cgatgcccaa  |
| 18301 | cgtgccctat  | cttttatcaa  | gccagatgtg  | agtcttacga  | ttaacattaa | agaagctggt  |
| 18361 | gatggtcagg  | ttgctgaact  | ggccaaggca  | ggtgtaaacg  | tatctgactt | taataaggga  |
| 18421 | aatatcaagg  | cccgccaacg  | tatgataacc  | caatatgcgg  | ttgctggtga | aaatagtggg  |
| 18481 | gcagttattg  | ggacagacca  | cgccgctgaa  | aaccttacag  | ggttcttcac | aaaatttggg  |
| 18541 | gatggtgggtg | cggatatcct  | gccactcttt  | cgtctaaaca  | agcgtcaagg | cgctgccctt  |
| 18601 | cttgagagc   | ttggtgctga  | taaagccctt  | tatgaaaaag  | taccaacagc | tgacctggaa  |
| 18661 | gaagataaac  | caggaattgc  | cgacgaaatg  | gcattgggag  | tgacctatca | tgagattgat  |
| 18721 | gattaccttg  | aaggcaagga  | agtatcagcc  | aaagctcagg  | aaacgattga | gacttgggtg  |
| 18781 | cgtaaaggct  | aacacaaacg  | tcacttgcca  | atcaccattt  | ttgatgattt | ttggaaataa  |
| 18841 | taagagaaat  | gatttatgat  | taaagcttat  | attgattttt  | ggaagcgtgc | ctttgatttt  |
| 18901 | agtggacgtt  | cgacacgccc  | agactactgg  | tgggtttact  | tgattaatgt | catcattagt  |
| 18961 | actatccttg  | tagtaggttt  | tgttctcatt  | cctttcttca  | gtaatgtgtc | tcataaccce  |
| 19021 | gcatatatta  | atgactcaac  | tgaaatacaa  | aaaatgattt  | tgaaatatat | gtcaccaata  |
| 19081 | atgatttttg  | gattgatcat  | attaattcca  | caactgtccc  | ttcaattttc | tcgtttgcga  |
| 19141 | gatgcaggta  | ttcatccggc  | ttgggggctt  | ctaagttgta  | tagggcttgt | accaatcttg  |
| 19201 | actttcttct  | cattcattgg  | aagtattgta  | ctcattgtca  | tgtcatgtca | gccaactaaa  |
| 19261 | ccagcacctg  | aaacgctttt  | tgataaagtt  | gaataagatt  | gtcgtacccc | taggtttaac  |
| 19321 | ctaggggtat  | ttttaaattg  | aatttttcaga | aattagtgat  | aaaatagata | gtaataagtc  |
| 19381 | ttaaaaggag  | gaatcttatg  | acttcactat  | caacagattt  | cacagaaaaa | ctatttgcag  |
| 19441 | attataaggc  | caatgccaa   | tatggcgcta  | ttgaaaaatgc | agtaacccat | aacggcttgc  |
| 19501 | ttaaatctat  | cgagacacgt  | caatcagaag  | tggaaaaatga | ttttgttttc | tcaattgatt  |
| 19561 | tgactaaaaga | tgaggtgtct  | aaccaaaaag  | cttcaggctc  | ttgctggatg | tttgcgcccc  |
| 19621 | ttaactactt  | ccgccataaa  | ttgatttcag  | acttcaaatt  | ggaaagtttc | gagctttctc  |
| 19681 | aagcccacac  | atthtttctg  | gataaatatg  | aaaaatcaaa  | ctggttcttg | gaacaaatta  |
| 19741 | ttgctacagc  | agatcaagaa  | attggtagtc  | gtaaggttaa  | attccttttg | gatacccttc  |
| 19801 | aacaagatgg  | tggacaatgg  | gatatggctg  | tatcactctt  | tgaaaaatat | ggtgttgtac  |
| 19861 | caaaatcagt  | atatccagaa  | tctgtagctt  | caagcaatag  | tcgtgagctt | aatcaatacc  |
| 19921 | ttataaaact  | ccttcgtcaa  | gatgcccaaa  | tcttgcgcca  | tttgattgcc | agtgggtgctg |
| 19981 | atcaggctgc  | tgttcaagct  | aaaaaggagg  | agttccttca  | agaaatcttc | aattatcttg  |
| 20041 | ccatgacctt  | tggcttgcca  | ccacgtcagt  | ttgattttgc  | ctatcgagat | aaagatgata  |
| 20101 | actatcgatc  | tgagaagggt  | atcacgccac  | gggccttctt  | tgaaaaatat | gttggcctta  |
| 20161 | aactcagcga  | ctatgtatca  | gttatcaacg  | ctccaacagc  | tgataaacct | tacggaaaat  |
| 20221 | cttacacggt  | tgagatgttg  | ggaaatgttg  | taggtgcgcc  | aagtgttcgt | tatattaacc  |
| 20281 | tgccaatgga  | ccgattcaaa  | gagcttgcta  | ttgcacagat  | gaaggcagga | gagagtgtat  |
| 20341 | ggtttgggtc  | agatgttggg  | caggtttcgg  | accgtcaaaa  | aggtattctt | gcaactaatg  |
| 20401 | tttacgactt  | tacagctagc  | atggatatta  | actggactca  | agacaaggct | ggacgtttag  |
| 20461 | actacagtga  | atctctcatg  | acctatgcca  | tggatttgac  | aggtgttgat | ctggatgctg  |
| 20521 | atggtaaacc  | aattaaatgg  | aagattgaaa  | actcttgggg  | agataagggt | ggacaaaagg  |
| 20581 | ggtactttgt  | tgcttctgat  | gcttggatgg  | atgaatatac  | atatcaaact | gttgttcgca  |

|       |             |             |             |             |             |             |
|-------|-------------|-------------|-------------|-------------|-------------|-------------|
| 20641 | aagatttcct  | tacagctgaa  | gagttggctg  | cctatgaagc  | agatccacaa  | gtgcttgccg  |
| 20701 | cttgggaccc  | aatgggatct  | cttgcttcaa  | aataagagga  | tatttcacaaa | acactggata  |
| 20761 | gaattccagt  | gttttttagtt | gacttcatta  | aaatttatgg  | ttgtaaaaag  | aggctctata  |
| 20821 | atttctgtag  | tgggtaaatc  | ctctatggag  | attatggagc  | ctttttgatt  | gtagaaaaaa  |
| 20881 | agtcccatat  | gacctataat  | gaaaagcgac  | taaaccatca  | tttttagaaag | actcatatgg  |
| 20941 | aacaactaaa  | tcttatcaca  | aattttcttg  | gaataaaaaga | caaaaaatatt | atcatcacta  |
| 21001 | atgaatacga  | tatgggaatg  | cacaaagaac  | ttcacggtta  | cttggattac  | gagtctccta  |
| 21061 | aatgtcctgc  | ctgcaaggga  | cagatgggca  | aatacgactt  | ccagaaagcc  | tctaaaatcc  |
| 21121 | cgtatctgga  | gtgtgctggc  | taccgaactc  | tcattcgcct  | gaaaaagcgc  | cgtttcaagt  |
| 21181 | gtaaggagtg  | cggaaaaatg  | gctgtcgcgg  | aaacttctct  | ggtcaagaag  | aatcaccaaa  |
| 21241 | tcgcaaccgt  | cgtctatcag  | aaaatcgctc  | aattgctcat  | tgaaaaacag  | tctatgaccg  |
| 21301 | acattgccaa  | gcgccttgcc  | gtctctacct  | caaccgtcag  | tcgcaagcta  | aatgagttcc  |
| 21361 | aattttaaac  | cgactggaat  | tggctgcctg  | agaatatgag  | ctgggatgag  | tacggtttca  |
| 21421 | agaagggaaa  | aatgagtttc  | atcgctcagg  | atttcgactc  | attaaaagtc  | atcacaatcc  |
| 21481 | tcgacggacg  | cacgcaagca  | acgattagaa  | accacttcct  | acgctattcc  | agacaggata  |
| 21541 | gaaatcgcgt  | taaagtcatc  | actatggaca  | tgtttagccc  | ttattacgac  | atcgccagaa  |
| 21601 | aattattccc  | taacgctaag  | attgtccttg  | atcgctttca  | cattgtgcaa  | caccttagtc  |
| 21661 | gtgctatgaa  | ccgcgtccgc  | attcaaatca  | tgaaccattt  | ggaccgtcag  | tcacaggaat  |
| 21721 | atcgtagcct  | gaaacgctac  | tggaaactga  | tccaacaaga  | tagtcgcaaa  | ctcaacgata  |
| 21781 | aacgctttta  | tcgtccgact  | tttcgtgcgc  | atttaaccac  | caaggaaatc  | ctagaaaagc  |
| 21841 | tactgtcata  | ctctcaagaa  | ctgagagaac  | attatgaact  | ctaccaactt  | ttacttttcc  |
| 21901 | atttccaaga  | gaagaactcg  | gaccatttct  | ttgacctcat  | tgaagagacg  | agttccagcg  |
| 21961 | tacaccctat  | ctttcagaca  | gttttttagaa | cttttttgaa  | agataaagac  | aagattatca  |
| 22021 | acgccctcga  | actgccgtat  | tcaaacgcaa  | aactggaagc  | aacgaacaat  | ctcatcaagg  |
| 22081 | tcattaagcg  | aaatgccttt  | ggcttcagga  | actttgaaaa  | ctttaagaaa  | cggattttga  |
| 22141 | tggcagtaaa  | tattaaaaaa  | gagaagacca  | aactggctct  | ctcaagaatt  | tagcttttca  |
| 22201 | tctaccctact | acagttgaca  | aagagcctaa  | aaagagctat  | ctaattggata | actcttttca  |
| 22261 | attccttttt  | actcatctac  | tgtagaagta  | gaagtgtttg  | aatttgaatt  | ctcagcaccg  |
| 22321 | ttagaaccgg  | atggtgaagg  | atttgttgat  | gcactctggg  | catactgttg  | actatcttgt  |
| 22381 | gaacttgatg  | agtcactact  | tttaccataa  | tccgaacttg  | atgagtcact  | acttttacca  |
| 22441 | taatccgaac  | ttgatgatga  | gctagatggt  | cctagtgatc  | cgttataaac  | atttgacggt  |
| 22501 | gacgaaccag  | ttaggaagac  | gtaactacca  | ttgttgtaaa  | caccactagg  | catatcgaaa  |
| 22561 | tctttcgaac  | ctgcaccata  | catctgggtg  | aggtagctac  | ttgttagacc  | gtagatttgt  |
| 22621 | ttagcgatat  | ttaggtctga  | gccataaagt  | ggagttttac  | ggttttcata  | acctgtccaa  |
| 22681 | atggccattg  | catatttagt  | attataacca  | acgaacgttt  | cgtcaggaac  | aataagatca  |
| 22741 | gcgtagacgc  | cactttcttt  | ttgtacttga  | tagtactcat  | cgtcactgta  | gttagatgta  |
| 22801 | cccgttttac  | cggcattgat  | cgtgccaggt  | acataagctt  | cagtcgctgt  | accacctgtc  |
| 22861 | aaaacctgtt  | tcaacatgct  | attcatcata  | taagctgttt  | gtggcgacat  | ggcctcgaca  |
| 22921 | ccttttagaat | cgtatgattt  | tgttgaaacca | tcttcaaatt  | taattgattt  | aatgtaggaa  |
| 22981 | ggtttatagt  | aagtaccacc  | attggcaaag  | gctgcatagg  | cagccgccat  | cttctcactt  |
| 23041 | gaagcaccat  | atttaggatc  | tgatgatggt  | gttgaagatg  | agatagcggt  | tgaatagaac  |
| 23101 | atctctgggt  | actcaatacc  | taaatctttc  | aaaaaggatt  | gagcataatc  | caagccagtc  |
| 23161 | gcttgaagcg  | ctttaaccgc  | agtaacgtta  | cgtgattggt  | gaatcgcata  | agtcagagag  |
| 23221 | atacttccgt  | aatacttgcg  | gtcccagttg  | taaactggag  | ttgaagtacc  | tgggaaatta  |
| 23281 | taaggggtat  | cgtaaacggt  | agtaccagtg  | ttagtatata  | cccttttttc  | aatacaggtt  |
| 23341 | gcgtaatcgg  | tgatagggtt  | cattgtagac  | ccccagtcac  | gatcagtttg  | aacagcttgg  |
| 23401 | tttgtaccaa  | gggcaatggt  | ttcgtcttgg  | tgacgtgatc  | ccaattgagc  | aacaacacgt  |
| 23461 | ccattggtaa  | catcaatgat  | agtagaagct  | acttgaaatt  | tgtcatcagg  | ataagcaata  |
| 23521 | taatcatttg  | agttgtagac  | attccaaatg  | tatttttgaa  | tatcaggatc  | aagatttgta  |
| 23581 | tagacatcga  | gtccagctga  | gtagatatca  | gcattggctt  | cggtagagac  | ttgttcaata  |
| 23641 | acttgtttga  | tgtagttatc  | taggtatggt  | tcgtagctag  | ctttattcgt  | aagtgggaaga |
| 23701 | agaccatctg  | atacatccgt  | tgcttttagct | tgctcgtact  | cctcttttaga | aataatttttg |
| 23761 | tcttcataca  | tttcattaag  | aacagtgttg  | cgacgttctt  | tagcagcatc  | cggatttagca |
| 23821 | taaggattat  | attgtgttgg  | tgcttgtggg  | ataccagcaa  | gaagagctgc  | ttgggcaact  |
| 23881 | gagaggtcac  | ctaattcttt  | accaaataaa  | gatttagctg  | cggcttctcat | accgtagtaa  |
| 23941 | ccattaccca  | tataaacctt  | attaacgtag  | aagggtcaaga | tttcttgttt  | agtatactga  |
| 24001 | cgctccattt  | ggagagataa  | ccatatttct  | tgtgacttac  | gtttaagggg  | ttgggtctgag |
| 24061 | gtattagttg  | agaagtaggc  | taacttaatc  | aactgttgat  | caagtgtaga  | tcccccttga  |
| 24121 | gtgctgttat  | ggcgaagggt  | gttaatagcg  | gctcccataa  | tacgataaac  | gtcaatgccg  |
| 24181 | cgatgggtaa  | agaaacgctt  | atcctctata  | gaggtaattg  | cattgactag  | gattatagga  |
| 24241 | atctcatctg  | ttgatgcact  | ttcacgtttt  | tcggatccca  | agtcagcaat  | aagaccacca  |

|       |             |             |             |             |             |            |
|-------|-------------|-------------|-------------|-------------|-------------|------------|
| 24301 | ttaccatcgt  | aaatcctact  | tgagtttggt  | gattgcaact  | tgttctcggt  | aagtttagga |
| 24361 | acactgctaa  | catagtaagc  | aaagagtcca  | ccaccagcga  | tgacacagat  | tacaaagaaa |
| 24421 | gtgagtagtc  | caataaaagc  | gtattttgca  | atacgccatc  | ctaaattttg  | atctgaagca |
| 24481 | gctgagcggt  | ttcctttgct  | atagcgagaa  | gaatctgaac  | gtttaacctg  | tgtgttttta |
| 24541 | gcacgtttag  | ttgaaccggt  | aagtgattct  | ttaaagttgc  | tgaaattaaa  | tttagccatt |
| 24601 | atgtgttacc  | acctaataat  | ttttcaatga  | tctctaaata  | aggaacttga  | ggataagctg |
| 24661 | attctgcgat  | tgcataacct  | ctttttttga  | tataatcaag  | aggcattgat  | tttgtcccct |
| 24721 | tatcaatttg  | ataaaaagcg  | attaagtctt  | tggcaggcag  | aaggtagggt  | tccttaagcg |
| 24781 | ttgaaaagtg  | gagtagcacg  | aagcagattc  | catcttgatt  | gatgacctga  | gacatgtgct |
| 24841 | taatttgatg  | cgcataaaag  | tttttcatag  | gcatagatgt  | cttttgccgt  | gtctctttgg |
| 24901 | cttcaaaaatc | aatatagtat  | cctttgtaaa  | cgccagagta  | gtcagtagtt  | gaggcttgcc |
| 24961 | taaagtaagc  | ttctacaatc  | tttgctcgtg  | agcgttttgg  | ataatcgact  | ttgacgatct |
| 25021 | gaaccggtgt  | aggtttctta  | tgaataacgg  | ctaagccacg  | cgacaaatag  | taatcattag |
| 25081 | tcgcattaat  | agcagattca  | aagttcatcc  | cccgattggc  | aaagtcaact  | ctattagatt |
| 25141 | tttttagtac  | gtacttggtg  | tatcttacga  | gatatctgat  | ggggatagtt  | taccatttct |
| 25201 | ttcccttctt  | atttataaga  | tatgcataaa  | gactatttca  | ttataaccata | aatgagcga  |
| 25261 | ggaaaacaat  | aaatgacatc  | actactcata  | acgggctata  | agagctttga  | acttgggtgt |
| 25321 | tttaaagaca  | aggatcctaa  | ggtaaaccatc | attaagaaag  | caatcaaacg  | tgatcttaaa |
| 25381 | cgttttttta  | gatgaagggtg | tggattggat  | gattttttact | gggaaccttg  | gttttgaatt |
| 25441 | ttgggcgcta  | gaagtggcta  | aggaacttca  | gaaagactac  | cctttgaggt  | tagcgacggt |
| 25501 | atttccattt  | gaaacacacg  | gtcagaattg  | gagtgaagct  | aaccaagaaa  | aattggcagc |
| 25561 | ctttaaacaa  | gttgatttcg  | taaagtatag  | ttttccagct  | tatcaatcgc  | cagctcagtt |
| 25621 | caaacaattt  | aatcagtttc  | tcatacgataa | tacagaccaa  | gcttatttat  | tttatgagcc |
| 25681 | tgaaaatgaa  | acaaatttga  | aatatttttta | caatatgata  | atagcagcaa  | gtgattatcc |
| 25741 | cttatttcga  | ttgacttttg  | atgacctcaa  | tgaagtcag   | tcggaatagg  | atataattac |
| 25801 | gtttttaaact | tgcatttttta | tatttttttc  | tgtatcataa  | aaacaataga  | ctgtaaagta |
| 25861 | ttagtaagtt  | agataagaca  | agtattggag  | agaataatg   | gctaagatta  | atttaacgcc |
| 25921 | caagaaaatc  | tacgaacaag  | aattttaaacc | aagcatacgt  | ggatacgata  | aaacagaagt |
| 25981 | tgatgagttt  | ctagatgatg  | tgatcaaaga  | ttacactgtc  | tacattgctc  | tagttaagga |
| 26041 | attgcaagaa  | gaaaatgcaa  | aactgaaggc  | taaggcaaca  | tcggctcctg  | caagccgtcc |
| 26101 | tgcataatgca | agtgcgacaa  | gtgaaccatc  | acatgccact  | gccaatattg  | cttcggcttc |
| 26161 | aaactatgat  | atctttaaacc | gtatcagtcg  | tttggaaaaa  | gaggtctttg  | gaaaacaaat |
| 26221 | cgtcgaataa  | aactgggtttt | gtgcaattttt | cggataaatcg | catggttgca  | agtcttccat |
| 26281 | gaggaaagtc  | catgctagca  | ctggctgtga  | tgccagtagt  | gtttgtgcta  | ggcgaatcaa |
| 26341 | taagcctagg  | gacttgattt  | tcaagttacg  | gcgagcgaac  | tggctaagtc  | tgcgatagg  |
| 26401 | tttttagtagc | tctgaaagtg  | ccacagtgc   | ggagttttta  | gggaaacct   | aaaagtggaa |
| 26461 | cgcggtaaac  | ccctcaagct  | agcaacccaa  | actttggtag  | gggcatggga  | tggccggaaa |
| 26521 | cgaacggacc  | attctgactg  | ctatgcagta  | gacagatgat  | tatcgaagga  | agtggtagct |
| 26581 | agtcacttct  | ggaacagaac  | atggcttata  | gaaaattgca  | tataggtgag  | gctgggacac |
| 26641 | atgtctcagc  | cttctttttag | caagaatcgt  | ctcttttgcg  | tctaccatct  | aagggaaga  |
| 26701 | gtgaataata  | agctatagct  | tagggaaatt  | tgtactcgta  | ataattaggt  | aaaaggatga |
| 26761 | caatgaaaga  | aacattttaca | ttagtagcaa  | ctgctgcagc  | cggacttgaa  | gctgtggttg |
| 26821 | gacgtgaact  | acgtgagttg  | gggtatgaga  | cccaggttga  | aaatggtaag  | gtgcgttttc |
| 26881 | agggtgatgt  | tcgtgcaatt  | gctgaaacta  | acctttgggt  | gagagctgca  | gaccgtatca |
| 26941 | agatttggtg  | gggtgagttt  | ccagcacgta  | cttttgagga  | gctttttcag  | gaaatttttg |
| 27001 | cttttgactg  | ggaaaattat  | cttccttag   | gtgcaaagtt  | cccaatttca  | aaaactaaat |
| 27061 | gtgtttaaact | aaagcttcat  | aatgagccgt  | ctgttcaggc  | gattttctaaa | aaagctgtcg |
| 27121 | ttaaaaaact  | acagaagtat  | ttccaccgtc  | cggaaaggag  | gcctcttcaa  | gaaacagggt |
| 27181 | cggaaatttaa | gattgaagtt  | tctatcttaa  | aggataaggc  | tactatttta  | attgatacta |
| 27241 | caggcgctag  | tcttttttaag | cgtggttatc  | gtactgataa  | aggtggggca  | cctattaaag |
| 27301 | aaaatatggc  | agctgctatt  | cttgaactta  | gcaactggta  | tcctgacaaa  | cctttgattg |
| 27361 | acccaacttg  | tggttcgggg  | accttctgta  | ttgaagctgc  | tatgattgga  | atgaatattg |
| 27421 | caccaggttt  | taatcgatg   | tttgcttttg  | aggcatggaa  | ttgggtgggt  | aaagatttag |
| 27481 | tacagtcagt  | acgagatgaa  | gctgatagca  | aggcaaatta  | cgatgttgca  | ttagacatta |
| 27541 | tggggtgtga  | tattgatagc  | cgtatgggtg  | agattgctaa  | ggctaattgct | cgcgaagctg |
| 27601 | gtcttgaaga  | tggtgtttaa  | ttcaaacaaa  | tgcgtttaca  | ggacttgaaa  | acagataaaa |
| 27661 | taaacgggtg  | cattattttca | aatcctcctt  | atggggagcg  | cttggttgat  | gacaaggccg |
| 27721 | tggatatctt  | gtataatgaa  | atgggtcaaa  | cttttgcgcc  | gcttaaaacg  | tggagcaagt |
| 27781 | ttatcttgac  | cagtgatgaa  | caatttgaaa  | gtaaatacgg  | catgaaagct  | gataaaaaac |
| 27841 | gtaagcttta  | taacggaaca  | cttcgcgttg  | atgtgtatca  | atatttttga  | gagcgtgttc |
| 27901 | gccgttctga  | ggctagaaaag | gtaaattaaa  | cgtgtcagaa  | gataaaacac  | aaaatggcta |

|       |            |             |             |             |             |             |
|-------|------------|-------------|-------------|-------------|-------------|-------------|
| 27961 | tgaagaaagc | caagagttag  | atttccaaga  | tgccaaggaa  | atgacagtcg  | gtgaggctgt  |
| 28021 | ccgcaaagaa | gctgagatta  | atgctgggtg  | aaccgaaaca  | gatagtattt  | tggataagta  |
| 28081 | tattaagcaa | catcgtgaag  | aagttacctc  | acaaaaattt  | tcaaagaaaa  | ttgaagcaga  |
| 28141 | tggcgataca | tcacccttgg  | atgccttcat  | tcaaaagcaa  | cgtcaggaat  | ttgctgattc  |
| 28201 | aggtttgatt | ggtcaaacat  | tggctaata   | gtcaactaac  | tcaacgactg  | ctgacgaaac  |
| 28261 | agtaacacct | attacatctg  | gttttggcac  | aactgaaact  | aaggcagatg  | atactcaagc  |
| 28321 | tcctgttgac | tctgaaatca  | ctgtgaaacc  | agaaagttaa  | agctctgaaa  | ccattataac  |
| 28381 | atcaactaat | gctgaccgtt  | ttatcacgtc  | agaagcagaa  | aaatttgatc  | ttggtgaagc  |
| 28441 | ccttgctgcg | acgactacct  | caactaatca  | acaagttgat  | aacactgcta  | tggtagacaa  |
| 28501 | tgttgatgat | ccggaaccag  | aaagtacttt  | acctgctgat  | gacaagtctt  | ctgaaccaca  |
| 28561 | agcctctaaa | cctctgttgg  | aagatgttgg  | agtctcagaa  | acaatcgact  | cagacgctat  |
| 28621 | tgccacaaca | gttgctggtg  | taacaggagt  | taaagctgat  | gaagcaaaaag | cgacacccaa  |
| 28681 | agtgtctatg | acagtttagtc | gtccatcagc  | agaagataaa  | atctcttcag  | ggtctatttc  |
| 28741 | tccatctcat | aaaggtgtct  | ttgatggtga  | tattccagtt  | tatcgccgta  | agggtgttgt  |
| 28801 | tatcggtgct | ctcacggttc  | ttgctctagc  | tataattggt  | gggagctatg  | ctctttataa  |
| 28861 | agtaacacat | agccaatctg  | cgaaaactac  | aagcactgct  | tcttcagcag  | tgatatcatc  |
| 28921 | atcaagcaag | ggcgcacag   | cttctgataa  | taaagccttc  | gaagacatgt  | ataagaattt  |
| 28981 | cttcacagat | gatgagcaaa  | caaaactagc  | taatgatcaa  | tttggttaagc | tatcagactt  |
| 29041 | ggaaaaacta | cttaaaaaat  | tggaaaaaac  | caagtattat  | gatgcagcta  | agaccaataa  |
| 29101 | cgataacttg | aagaaacaaa  | tcgaagctat  | tgaaaaagtc  | aatagtaagt  | atgaatcaga  |
| 29161 | tgctcttgta | gacggttagct | ataatgcctc  | tatctcagtt  | aaatctgatg  | caaactttaa  |
| 29221 | tgatctttca | gaacgtgtaa  | caaatactgg  | caatgctagt  | cttgatagca  | ttatccaaga  |
| 29281 | agtcattaag | ggcggtaaaa  | cacagcttga  | agaaaagggg  | aaggctgcaa  | gtgcaacgtc  |
| 29341 | tgcagtgaca | gcttctgaaa  | gtgttaatac  | cgctactcct  | tcgggagaca  | acacatctgg  |
| 29401 | agcagcta   | tcaggtgtaa  | caggtgcggc  | tgggtggagt  | tctagtggta  | cagctgcaac  |
| 29461 | ttcaacagtt | gtgacacgtg  | gcatcatgaa  | ttacaatcca  | tctatccttc  | aacgtgatcg  |
| 29521 | ctctcgtgtg | ccttataatg  | caaacgtagt  | agcggataca  | agtaatccag  | cttggacttg  |
| 29581 | ggctgatggg | gttcttgata  | agatcattgc  | aacatctcac  | tcacgtgggt  | acttctcagg  |
| 29641 | agataacttt | atccttgagc  | cagtcaacat  | catcaacgga  | aatgggttatt | acaacatgta  |
| 29701 | ccttccagat | ggaacttatc  | tcttttagtat | caactgtaag  | acagggttact | atgtaggcaa  |
| 29761 | tgggttcagg | cactcagata  | aacttgatta  | ttaataaaaa  | tcgacgacac  | tccctagggg  |
| 29821 | gtgttttttt | tgttttatct  | ttgtgaagtc  | cgaatttata  | agagttttgt  | gctataatag  |
| 29881 | ggggataaga | taggggtgaa  | tactatggcg  | aaattgattc  | cgggtagagt  | ccgtaatgag  |
| 29941 | ggaattaaac | tttttgaaaa  | gggtttaatt  | gccattagtc  | aggtctcaga  | aactcagttg  |
| 30001 | gacacgacgg | ttggtcaaca  | tcatttaatt  | tatgcactcg  | atgatcctga  | aatcatgtgt  |
| 30061 | gactgtgatt | ttttcgctca  | aaaaggctat  | tgctcccatt  | tggcagcggt  | tgagtactat  |
| 30121 | ctaaaaaatg | ctaaggaggg  | ccagcgtctc  | ttagcaaaat  | tagaggagaa  | acaagagtcc  |
| 30181 | gcccaggacc | aagagcgggg  | gcgttctttt  | ggtggtttat  | ttttagagag  | cctttctctg  |
| 30241 | aatgagaatg | atacagttag  | atatagcctc  | acggtagagg  | gagaggaatc  | tacctttggt  |
| 30301 | tcagagattt | ggtggagttt  | acgtttacgt  | cgcttaccgg  | acgaacgttc  | ttacgttggt  |
| 30361 | cgagatatcc | cagccttcct  | caagcttata  | gagactgaag  | gctattatca  | gataggtaag  |
| 30421 | aattactatg | aacctctatc  | actcattcag  | tttgaccagg  | cttcacaagc  | atttttagac  |
| 30481 | tttttaggac | ggatgattcc  | agatgaagcc  | aaaacaaatt  | taacctttat  | tttaccgaat  |
| 30541 | aatgcacgac | accttagtct  | cccctatggt  | ttttttgagg  | agggattgag  | gttgatgcaa  |
| 30601 | gatttgatg  | gcttcagggt  | tgaattggaa  | ggtattgaat  | atcgacgctt  | tttggtagag  |
| 30661 | gacttgactg | ctgaagccaa  | tcttttctcg  | tttgatattt  | gtgtcgagcc  | caaaatgatt  |
| 30721 | gaattgactg | ttgctgagaa  | aaatagccaa  | acatttttta  | ataatcgtat  | tatcttttat  |
| 30781 | cagggtgttt | tctatcgtct  | taatagaaaa  | cagcaaaaaa  | ttttgcttgg  | cttacgttct  |
| 30841 | ctccctatcg | gaagcgattt  | gaataaacat  | gtcagtttta  | atctagaaga  | acaagctatc  |
| 30901 | ttagctgcta | gtctttctga  | ttttaagact  | atgggaccgg  | ttaaagcccc  | aaaagcgttt  |
| 30961 | aatatcaaag | atttcacccc  | gagatttcgc  | tttgatttga  | aagggtgaacg | cgagggttgtg |
| 31021 | ctcacattgg | cttttgattt  | tgatggatat  | gttggtggata | atcgttatga  | gttaagtcac  |
| 31081 | ttaggcttta | ctagtaacta  | tcgtaatgaa  | caggctattt  | ttcgtttgat  | ggttaaacad  |
| 31141 | ggattttacc | ctgattttca  | gtcatctaaa  | cgcttaaata  | gtaatcaaga  | gctctatgat  |
| 31201 | ttctttataa | atactctacc  | agcttttgaa  | aatgcagggc  | cagttcttat  | tggacaggag  |
| 31261 | ttgcgtgact | tacgtgttga  | acagagtcca  | caaattcagg  | tagagcgcca  | aggaaatcta  |
| 31321 | ttagagattt | cgtttgattt  | ttcaagtctc  | gatgatgagg  | atgtggatca  | tgctttagaa  |
| 31381 | gctttgatgg | acagagcgcc  | ctactttggt  | aatcgtagtg  | gtcagttgat  | tgtctttgat  |
| 31441 | gaggggacac | aacgtatcag  | tgagagtcta  | agaactttga  | gggcccgtta  | ttcgggggaa  |
| 31501 | gggcatctag | aactccatca  | attagccgcc  | tatcaattga  | tggactctct  | ttcagaaaat  |
| 31561 | gattctgttc | gttttttcaga | agattttcaa  | cagctagcgc  | aacatttgag  | aaaaccggaa  |

|       |             |             |            |             |             |             |
|-------|-------------|-------------|------------|-------------|-------------|-------------|
| 31621 | acatttcgact | tgccatccta  | tcatgtagaa | gttgaccttc  | gtccttacca  | agaaagagga  |
| 31681 | gttcaatggc  | tatcaatggt  | gcatcactat | ggtttttggtg | gtattttagc  | cgacgatatg  |
| 31741 | gggttgggga  | aaactttaca  | gaccattgct | tatctttctg  | cacatttaga  | ggatggacaa  |
| 31801 | cgagtcttga  | ttctatcgcc  | atcgagttta | atttacaatt  | ggcaggatga  | gtttaaaaaa  |
| 31861 | tttgctcctc  | agttagatgt  | agcagtttct | tatggactta  | agccaaaacg  | tgatgagatc  |
| 31921 | attgcagaag  | accatcagat  | tattattact | agctatgctt  | cattccgtca  | ggattttgat  |
| 31981 | gtttataaag  | ctggtcagta  | tgattatctc | attctagatg  | aggcacagggt | catgaagaat  |
| 32041 | actcagacga  | agattttctca | atatttacgt | gatttttctg  | ttccgcattg  | cctagctcta  |
| 32101 | tctggaacgc  | ctattgaaaa  | tcatttggtg | gagatttggt  | ctatttttcca | gattgtttta  |
| 32161 | ccagggcttt  | taccagctaa  | gaagactttt | cttaagctaa  | cacctatgga  | agtggcccg   |
| 32221 | tacattactc  | cattttattct | tagacgtaaa | aaagatgagg  | ttcttcctga  | tttaccggac  |
| 32281 | ctgattgaaa  | ttacacacca  | aagtgaattg | tcggatagtc  | aaaaggctat  | ttatttagca  |
| 32341 | caattgcaac  | agatgcaaca  | aggtttaatt | tcagcaagt   | atcaggaaat  | caatcgctcg  |
| 32401 | aaggtggaag  | tcttgctcagg | aattaccgcg | ttacgccaaa  | tctgtgacac  | gccagccctc  |
| 32461 | tttatggatt  | acgctggtga  | tagtgggaaa | ttagatagtc  | ttagagacct  | acttagtcaa  |
| 32521 | attaaggaat  | cagaccatcg  | tgctcttatt | tttccacaat  | ttcgtgggat  | gttagatatt  |
| 32581 | acagaggaac  | ttttacaaga  | gttaggtatt | tctcttata   | agctaacagg  | gtcagcccca  |
| 32641 | tctggtagtc  | gtcaggagat  | gaccagagcc | ttcaatcagg  | ggagtgcaga  | tgcttttttg  |
| 32701 | atttctttaa  | aagcaggggg  | ggtagggctc | aacttgactg  | gtgctgatac  | agttattctg  |
| 32761 | attgaccttt  | ggtggaatcc  | agcggtgga  | atgcaggcta  | ttagtcgtgc  | tcatcgtata  |
| 32821 | ggtcagaaac  | aaaatgtcga  | agttttccgt | ttgattacaa  | gaggtactat  | cgaagagaag  |
| 32881 | attcttgagc  | ttcaagaagg  | taagaaaaat | ctcgttacaa  | cagtattaga  | tggcaatgaa  |
| 32941 | agctgtgcta  | gcatgacagt  | tgaggatatt | aaagaaattc  | ttggtattgc  | aatatcttaa  |
| 33001 | tctgttatac  | ttaatatgtg  | aatactaaga | tataaaaaatg | acactaggca  | aatcttttga  |
| 33061 | attaggatat  | aatagaatat  | tgcaagacgt | atctcccat   | tcccgattgt  | ttatattaag  |
| 33121 | atacgtatca  | tctcgaaaac  | gaaaggaagt | cttttatgca  | tcgccaaaga  | cgacaatttc  |
| 33181 | cgttgattcc  | ggacggagaa  | tcttgcttgc | agaacctat   | ctctatgcgt  | ttatacgaaa  |
| 33241 | atgaagattt  | aatcactaat  | atccgtggtc | cttatcagga  | taaggactat  | aacgatttct  |
| 33301 | ttctgaacca  | tgatttcttg  | tcagctaagc | ctcataaacg  | taagcaggct  | ccagaccgag  |
| 33361 | ctgaaacaca  | agaggatgga  | atgacttatg | ctgaagaagc  | ccgtgaaaag  | gcgaagcgtg  |
| 33421 | acgtacgtga  | taaacgccaa  | aaatacctac | gccaaagaagc | tcaatcaact  | aaatctacga  |
| 33481 | atatccgttc  | actagctgct  | aagcctaagg | tagaaaataa  | gctaagcttt  | gaggctactg  |
| 33541 | ttgaggcagt  | tgctgtaacg  | acagataagg | agccagtgat  | gacgtctatc  | ttgggagctc  |
| 33601 | ctgtaagtgc  | tattaagaga  | acattagcac | caaatggtaa  | acactcaaaa  | atccatcact  |
| 33661 | tggcaaatcg  | tctgaaacaa  | gatacttata | tcttggcaga  | agtggctcca  | acttatcaac  |
| 33721 | aacctagtaa  | tccatctcgt  | aagaacgtca | agaaaaatag  | ctatgacttc  | ttgaaacgta  |
| 33781 | gccaggttta  | taattacaca  | gaacgtcaaa | ttcaccgtga  | acaccgaatt  | gctcaagaac  |
| 33841 | taaatttgac  | gcatttagaa  | gatgcaaatt | aatcgcagtt  | tgattgcaag  | gagaaactat  |
| 33901 | gtcaaaaact  | tatcatttta  | ttggaattaa | aggatctggt  | atgtcggctt  | tggctttgat  |
| 33961 | gctccatcaa  | atgggacaca  | aggttcaagg | ttccgatgtg  | gaaaaatact  | acttcaactca |
| 34021 | acgtggtcct  | gagcaagcgg  | gcattccaat | ccttcctttc  | gatgaaaaaa  | acatcactga  |
| 34081 | agatgttgaa  | ttgattgctg  | ggaatgcttt | tcgtgaagat  | aacaacgttg  | aaattgctta  |
| 34141 | tgccattaaa  | aatggttata  | agttcaagcg | ttaccatgaa  | tttttgggtc  | atttcatgaa  |
| 34201 | tcagttcact  | agctttgggtg | tggctggtgc | acatggtaag  | acctctacga  | caggactcct  |
| 34261 | gtcacactct  | atgaaaaaca  | tcacagatac | gtcatacctt  | atcgggtgatg | gaacaggacg  |
| 34321 | tggttctgcc  | aatgcgcaat  | actttgtctt | tgaagcagat  | gaatatgaac  | gtcatttcat  |
| 34381 | gccgtaccat  | cctgcttact  | caattatcac | taacattgac  | tttgaccatc  | cagattactt  |
| 34441 | tacaagtatt  | gatgatgttt  | tctcagcatt | cgatgattat  | gcaaagcaag  | tacaaaaagg  |
| 34501 | gctctttgtt  | tacgggtgagg | attctaacct | ccgtaaaatt  | acatccaatg  | caccaatcta  |
| 34561 | ttattatgga  | tttgaagaaa  | atgatgactt | catggcaaca  | gatattatct  | gtacaaccac  |
| 34621 | gggtgctaac  | ttcaagggtga | agcatgatgg | acaaatcata  | ggggaattcc  | atgtaccagc  |
| 34681 | ttatggtcgt  | cacaatatct  | tgaatgcaac | tgcggttatt  | gctaacttgt  | atgtagctgg  |
| 34741 | ttttgacatg  | gccttagttg  | ctgaacatct | aaaaactttc  | tcaggggtta  | aacgtcgttt  |
| 34801 | cacagagaaa  | attatttagtg | atactgttat | catcgatgac  | tttgctcacc  | acccaactga  |
| 34861 | aattattgca  | acactagatg  | cagcacgtca | aaagtaccca  | tctaaagaga  | ttgttgctat  |
| 34921 | tttccaacca  | catactttta  | cccgtaccat | tgctcttctt  | gatgactttg  | ctgaggcttt  |
| 34981 | aatgaagcg   | gatgctgtct  | atctggcaca | aatttatgggt | tctgcgcgtg  | aagttgacca  |
| 35041 | cggatgatga  | aagggtgaag  | atcttgccgc | taagatcaat  | aaacctgcca  | aagtggttac  |
| 35101 | agttgagaat  | gtttcacctc  | tccttgacca | tgacaatgct  | gtctatgtct  | ttatgggagc  |
| 35161 | tggggacatc  | caacttttatg | aacgttcatt | tgaagagctc  | ctagcaagct  | tgcaaaccaca |
| 35221 | catgtaatat  | attaaggggt  | gtagcgattt | cgctcggctc  | tttctcttgg  | atagaaagga  |

|       |             |             |             |             |            |            |
|-------|-------------|-------------|-------------|-------------|------------|------------|
| 35281 | atccttagatg | attatttcgac | acgctagaac  | gaatgattgg  | actgatgttg | ttcgtatcga |
| 35341 | acaagataaa  | tttttcgcct  | gaagaggctg  | ctacaccaga  | ggctcttgca | gagcgtttag |
| 35401 | agacaatttg  | cgatactttc  | ctaattgctg  | aaattgatgg  | cactgtagct | gattatatcg |
| 35461 | aaggacctgt  | gatttcggaa  | cgatatctta  | cagatgactt  | attctacaag | gtaactccta |
| 35521 | atgctagtc   | aggaggctat  | atcgcggtta  | ctagtttatc  | tatctccaaa | gactttaaaa |
| 35581 | ggcaagggtg  | tggaaacatcc | ttgattgcag  | tttttaaaga  | cctgggtatt | gctcaaaaac |
| 35641 | gtcaagggat  | tagcttgact  | tgtcatgatt  | acctgattac  | ctactatgag | atgaatgggt |
| 35701 | tcattgacga  | aggtgagtc   | aatcaaac    | atggcgatag  | tatttggtat | aatatgggt  |
| 35761 | gggagaaccc  | agaaggctag  | taataccagt  | gttacgttac  | tgtgacaaag | aaccaattga |
| 35821 | tttgcattaa  | ctggtttttt  | aagatataat  | ggcgtttggt  | actatagagg | aggtatgcct |
| 35881 | tgacggacaa  | gcataatgaa  | tactcggaa   | ctgctgaaga  | tagcctaagc | tttaaaaatc |
| 35941 | agattcttcg  | agattttacaa | gaagcgacac  | ggctccgttc  | tcttcgtgag | gaggagcata |
| 36001 | aaaaaagtgc  | agctgttccc  | gagacaccac  | tttcaatgtc  | agctgatagc | catgcaatag |
| 36061 | attctggatc  | agcgtcaa    | aaagtaagta  | acccaaat    | gagttctcat | tctgttgctc |
| 36121 | atagtgtat   | agctaaaact  | atgacttctg  | agacggttcg  | agattttcaa | tatagtgttg |
| 36181 | acttgtcttc  | taatttctca  | gtgattctt   | cagcccctga  | tgtccattca | aacgtaatat |
| 36241 | caagtcctaa  | agagcaagtt  | gataaggaga  | aaaatttaag  | tattcctcag | gagactgaaa |
| 36301 | tattgaaacg  | tcgtttttaa  | cgtccagttt  | gggaaactag  | tcttaacgcg | gaatcagagg |
| 36361 | aagaatatat  | tcctgcagat  | gttgctaagg  | agcttattga  | agctaaggct | aaagaagcta |
| 36421 | tctacacgaa  | tcctaaagaa  | ttggtgtcca  | agatgacatc  | agaacgtcaa | aaagaagcat |
| 36481 | ttttgcggga  | acatcataca  | gtaagtaatc  | actctgaacc  | agtaagagtt | cagtcagatc |
| 36541 | tagtaactga  | tggcaatgag  | ggtgatgaga  | gtattgcttt  | agcagcagcc | tctgaaaaat |
| 36601 | ctaacaaaaa  | gaaacgtaag  | aaagtgaaga  | agaaaaagtc  | ttcaccaaaa | gatgtttaa  |
| 36661 | aggacggaat  | catcaacgaa  | gaaccgattt  | catgctccaa  | ccgaaatcaa | aaactcaata |
| 36721 | aaaataatcg  | tcgtgcagga  | cgagttgcaa  | gaaacatcat  | tgtcttcttg | attcttatct |
| 36781 | tatcattagc  | tggattcttt  | ggttatcgat  | atgttagtga  | tgcagttggt | gcaaaagatg |
| 36841 | tcaagtcgac  | taagtattat  | agtgttgaaa  | ttcctgaaaa  | ttcaggtagc | agttacatcg |
| 36901 | gtcagttggt  | ggaatcagct  | ggtgtcatta  | aatctggtaa  | agtctttaat | tactatacca |
| 36961 | agtttaagaa  | catttcaa    | ctaaaaagtg  | gttactataa  | ccttcagcct | agtatgacta |
| 37021 | tggatgaaat  | tattgaggca  | cttcagaaaa  | aagggaagtga | taagcctcag | gaaccatctc |
| 37081 | tgggtacagt  | cttggttaaa  | gaaggataca  | ccattgagaa  | aatcgccaag | gcggttgaag |
| 37141 | ttaattcatc  | agctaaaaaa  | ggtaaacatt  | catctactgg  | acttaaggaa | aaagacttct |
| 37201 | tgaaacttat  | gaaggatgat  | gctttcatta  | ctaagatgaa  | agcgaagtac | ccaaccttgt |
| 37261 | tggcaaacct  | tccgaattct  | acagatgcta  | agtatgtcct  | agaggggtat | ctgtttccag |
| 37321 | cgacttataa  | tattcatgac  | gatacgacgg  | tggaaatctt  | ggtagaggaa | atgctatcta |
| 37381 | cgatggatac  | ccacctatca  | ccatactatg  | caacaatttt  | atcaagtaac | cacaacgtta |
| 37441 | atgaaatctt  | gactctagct  | tctcttggtg  | aaaaagaggg  | agcaactgat | gatgaccgta |
| 37501 | aaaacattgc  | tagcgttttc  | tataatcgtc  | ttaattcaga  | catggccctg | caaagtaata |
| 37561 | tcgcggttct  | ttatgttctt  | ggaaaacttg  | gtcaagaaac  | gaccttgaaa | gaagatacaa |
| 37621 | cgattgatac  | gaatattgac  | tccccctata  | atgattatgt  | tcataaaggg | ttgatgcctg |
| 37681 | gtcctgtaga  | tagtcctagt  | ctgtcggcaa  | tagaagcggt  | tatcaatcca | tcttctacca |
| 37741 | agtacatgta  | ctttgtggcg  | gatgtatcaa  | ctggtaatgt  | ctattttgct | gagagctatg |
| 37801 | aagagcacca  | gcataatggt  | gaaacttata  | ttaatagcaa  | actaaaagat | aaatagtctt |
| 37861 | attggttaat  | taaaattcag  | tcactgacta  | ctgagtttga  | tttcaaacca | actggctaaa |
| 37921 | aaataggaaa  | gagaaaaaaa  | aatggcagaa  | aaaacatatg  | taatgccct  | agcagaaaaa |
| 37981 | aaaacaactt  | gaagcagaat  | tggaggagta  | caaactcgta  | cgtcgcccag | aagttgtaga |
| 38041 | acgcatcaag  | attgcccgtt  | cttatggtga  | cctttcagaa  | aactctgagt | atgaggcggc |
| 38101 | taaagatgag  | caagccttta  | ttgaagggtca | aattcaaatt  | cttgaaacaa | agattcgtta |
| 38161 | cgcagagatc  | gttgatagtg  | atgctgttgc  | caatgacgaa  | gttgcgattg | gtaaaacagt |
| 38221 | tgttggtgcaa | gaagttggta  | caagcgacaa  | agatacttac  | catatcgttg | gtgcagccgg |
| 38281 | tgctgatatt  | ttctcaggta  | aaatttcaaa  | tgaagccca   | agtgggatcc | ccgggtaccg |
| 38341 | agctcgaatt  | cgccctatag  | tgagtcgtat  | tacaattcac  | tggccg     |            |

**Amp6**

LOCUS

6A

DEFINITION

FEATURES

gene

Location/Qualifiers

87..656

/rbs\_motif="GGA/GAG/AGG"

/uscore="-6.43"

/rscore="0.91"

/sscore="-2.45"

/locus\_tag="6A\_01"

/conf="100.0"

/ID="6A\_01"

/cscore="84.82"

/partial=0

/tscore="3.07"

/gc\_cont="0.36"

/rbs\_spacer="5-10bp"

/start\_type="ATG"

/score=82.4

/codon\_start=1

CDS

87..656

/rbs\_motif="GGA/GAG/AGG"

/uscore="-6.43"

/rscore="0.91"

/sscore="-2.45"

/locus\_tag="6A\_01"

/conf="100.0"

/ID="6A\_01"

/cscore="84.82"

/partial=0

/tscore="3.07"

/gc\_cont="0.36"

/rbs\_spacer="5-10bp"

/product="cell division protein SepF"

/start\_type="ATG"

/score=82.4

/codon\_start=1

gene

660..917

/rbs\_motif="GGA/GAG/AGG"

/uscore="0.91"

/rscore="0.91"

/sscore="6.13"

/locus\_tag="6A\_02"

/conf="99.32"

/ID="6A\_02"

/cscore="15.55"

/partial=0

/tscore="3.07"

/gc\_cont="0.333"

/rbs\_spacer="5-10bp"

/start\_type="ATG"

/score=21.7

/codon\_start=1

CDS

660..917

/rbs\_motif="GGA/GAG/AGG"

/uscore="0.91"

/rscore="0.91"

/sscore="6.13"

/locus\_tag="6A\_02"

/conf="99.32"

/ID="6A\_02"



|      |                                                                                                                                                                                                                                                                                                                                     |
|------|-------------------------------------------------------------------------------------------------------------------------------------------------------------------------------------------------------------------------------------------------------------------------------------------------------------------------------------|
|      | /cscore="15.55"<br>/partial=0<br>/tscore="3.07"<br>/gc_cont="0.333"<br>/rbs_spacer="5-10bp"<br>/product="membrane protein"<br>/start_type="ATG"<br>/score=21.7<br>/codon_start=1                                                                                                                                                    |
| gene | 917..1717<br>/rbs_motif="None"<br>/uscore="-2.97"<br>/rscore="-3.27"<br>/sscore="4.35"<br>/locus_tag="6A_03"<br>/conf="100.0"<br>/ID="6A_03"<br>/cscore="86.53"<br>/partial=0<br>/tscore="3.07"<br>/gc_cont="0.331"<br>/rbs_spacer="None"<br>/start_type="ATG"<br>/score=90.9<br>/codon_start=1                                     |
| CDS  | 917..1717<br>/rbs_motif="None"<br>/uscore="-2.97"<br>/rscore="-3.27"<br>/sscore="4.35"<br>/locus_tag="6A_03"<br>/conf="100.0"<br>/ID="6A_03"<br>/cscore="86.53"<br>/partial=0<br>/tscore="3.07"<br>/gc_cont="0.331"<br>/rbs_spacer="None"<br>/product="cell division protein"<br>/start_type="ATG"<br>/score=90.9<br>/codon_start=1 |
| gene | 1961..2836<br>/rbs_motif="GGAGG"<br>/uscore="4.99"<br>/rscore="14.48"<br>/sscore="21.88"<br>/locus_tag="6A_04"<br>/conf="99.99"<br>/ID="6A_04"<br>/cscore="188.21"<br>/partial=0<br>/tscore="3.07"<br>/gc_cont="0.361"<br>/rbs_spacer="5-10bp"<br>/start_type="ATG"<br>/score=210.1<br>/codon_start=1                               |
| CDS  | 1961..2836<br>/rbs_motif="GGAGG"<br>/uscore="4.99"                                                                                                                                                                                                                                                                                  |

```

/rscore="14.48"
/sscore="21.88"
/locus_tag="6A_04"
/conf="99.99"
/ID="6A_04"
/cscore="188.21"
/partial=0
/tscore="3.07"
/gc_cont="0.361"
/rbs_spacer="5-10bp"
/product="cell division protein DivIVA"
/start_type="ATG"
/score=210.1
/codon_start=1
gene 3085..5886
/rbs_motif="AGGAG"
/uscore="4.11"
/rscore="11.88"
/sscore="18.4"
/locus_tag="6A_05"
/conf="99.99"
/ID="6A_05"
/cscore="588.14"
/partial=0
/tscore="3.07"
/gc_cont="0.388"
/rbs_spacer="5-10bp"
/start_type="ATG"
/score=606.5
CDS /codon_start=1
3085..5886
/rbs_motif="AGGAG"
/uscore="4.11"
/rscore="11.88"
/sscore="18.4"
/locus_tag="6A_05"
/conf="99.99"
/ID="6A_05"
/cscore="588.14"
/partial=0
/tscore="3.07"
/gc_cont="0.388"
/rbs_spacer="5-10bp"
/product="isoleucyl-tRNA synthetase"
/start_type="ATG"
/score=606.5
/codon_start=1
gene complement(6642..6863)
/rbs_motif="AGGA"
/uscore="2.85"
/rscore="6.93"
/sscore="12.77"
/locus_tag="6A_06"
/conf="89.11"
/ID="6A_06"
/cscore="-3.63"
/partial=0
/tscore="2.69"
/gc_cont="0.356"
/rbs_spacer="5-10bp"
/start_type="ATG"

```

|      |                                                                                                                                                                                                                                                                                                                                        |
|------|----------------------------------------------------------------------------------------------------------------------------------------------------------------------------------------------------------------------------------------------------------------------------------------------------------------------------------------|
|      | <pre> /score=9.1 /codon_start=1 complement(6642..6863) /rbs_motif="AGGA" /uscore="2.85" /rscore="6.93" /sscore="12.77" /locus_tag="6A_06" /conf="89.11" /ID="6A_06" /cscore="-3.63" /partial=0 /tscore="2.69" /gc_cont="0.356" /rbs_spacer="5-10bp" /product="transposase, partial" /start_type="ATG" /score=9.1 /codon_start=1 </pre> |
| CDS  |                                                                                                                                                                                                                                                                                                                                        |
| gene | <pre> complement(6907..7605) /rbs_motif="None" /uscore="1.79" /rscore="-3.27" /sscore="1.59" /locus_tag="6A_07" /conf="100.0" /ID="6A_07" /cscore="61.66" /partial=0 /tscore="3.07" /gc_cont="0.416" /rbs_spacer="None" /start_type="ATG" /score=63.3 /codon_start=1 </pre>                                                            |
| CDS  |                                                                                                                                                                                                                                                                                                                                        |
| gene | <pre> complement(7736..9064) /rbs_motif="GGAG/GAGG" /uscore="4.62" /rscore="6.9" /sscore="9.17" /locus_tag="6A_08" /conf="100.0" /ID="6A_08" /cscore="160.69" </pre>                                                                                                                                                                   |

|      |                                                                                                                                                                                                                                                                                                                                                                                                                           |
|------|---------------------------------------------------------------------------------------------------------------------------------------------------------------------------------------------------------------------------------------------------------------------------------------------------------------------------------------------------------------------------------------------------------------------------|
|      | <pre> /partial=0 /tscore="-3.65" /gc_cont="0.414" /rbs_spacer="5-10bp" /start_type="TTG" /score=169.9 /codon_start=1 complement(7736..9064) /rbs_motif="GGAG/GAGG" /uscore="4.62" /rscore="6.9" /sscore="9.17" /locus_tag="6A_08" /conf="100.0" /ID="6A_08" /cscore="160.69" /partial=0 /tscore="-3.65" /gc_cont="0.414" /rbs_spacer="5-10bp" /product="transposase" /start_type="TTG" /score=169.9 /codon_start=1 </pre> |
| CDS  |                                                                                                                                                                                                                                                                                                                                                                                                                           |
|      | <pre> complement(9061..9960) /rbs_motif="None" /uscore="-2.76" /rscore="-3.27" /sscore="-9.5" /locus_tag="6A_09" /conf="100.0" /ID="6A_09" /cscore="65.23" /partial=0 /tscore="-3.48" /gc_cont="0.394" /rbs_spacer="None" /start_type="GTG" /score=55.7 /codon_start=1 </pre>                                                                                                                                             |
| gene |                                                                                                                                                                                                                                                                                                                                                                                                                           |
|      | <pre> complement(9061..9960) /rbs_motif="None" /uscore="-2.76" /rscore="-3.27" /sscore="-9.5" /locus_tag="6A_09" /conf="100.0" /ID="6A_09" /cscore="65.23" /partial=0 /tscore="-3.48" /gc_cont="0.394" /rbs_spacer="None" /product="transposase" /start_type="GTG" /score=55.7 /codon_start=1 </pre>                                                                                                                      |
| CDS  |                                                                                                                                                                                                                                                                                                                                                                                                                           |
|      | <pre> complement(10097..10345) /rbs_motif="AGGA" /uscore="3.63" /rscore="7.79" </pre>                                                                                                                                                                                                                                                                                                                                     |
| gene |                                                                                                                                                                                                                                                                                                                                                                                                                           |

|      |                                                                                                                                                                                                                                                                                                                                                                                                                                                                                                                                                                                                                                                            |
|------|------------------------------------------------------------------------------------------------------------------------------------------------------------------------------------------------------------------------------------------------------------------------------------------------------------------------------------------------------------------------------------------------------------------------------------------------------------------------------------------------------------------------------------------------------------------------------------------------------------------------------------------------------------|
|      | /sscore="14.44"<br>/locus_tag="6A_10"<br>/conf="99.9"<br>/ID="6A_10"<br>/cscore="15.63"<br>/partial=0<br>/tscore="3.02"<br>/gc_cont="0.386"<br>/rbs_spacer="5-10bp"<br>/start_type="ATG"<br>/score=30.1<br>/codon_start=1<br>complement(10097..10345)<br>/rbs_motif="AGGA"<br>/uscore="3.63"<br>/rscore="7.79"<br>/sscore="14.44"<br>/locus_tag="6A_10"<br>/conf="99.9"<br>/ID="6A_10"<br>/cscore="15.63"<br>/partial=0<br>/tscore="3.02"<br>/gc_cont="0.386"<br>/rbs_spacer="5-10bp"<br>/product="Putative transposase, ISSmu2, partial"<br>/start_type="ATG"<br>/score=30.1<br>/codon_start=1                                                            |
| CDS  |                                                                                                                                                                                                                                                                                                                                                                                                                                                                                                                                                                                                                                                            |
|      | complement(10457..10669)<br>/rbs_motif="GGA/GAG/AGG"<br>/uscore="3.38"<br>/rscore="-1.74"<br>/sscore="4.22"<br>/locus_tag="6A_11"<br>/conf="99.91"<br>/ID="6A_11"<br>/cscore="26.42"<br>/partial=0<br>/tscore="2.58"<br>/gc_cont="0.362"<br>/rbs_spacer="11-12bp"<br>/start_type="ATG"<br>/score=30.6<br>/codon_start=1<br>complement(10457..10669)<br>/rbs_motif="GGA/GAG/AGG"<br>/uscore="3.38"<br>/rscore="-1.74"<br>/sscore="4.22"<br>/locus_tag="6A_11"<br>/conf="99.91"<br>/ID="6A_11"<br>/cscore="26.42"<br>/partial=0<br>/tscore="2.58"<br>/gc_cont="0.362"<br>/rbs_spacer="11-12bp"<br>/product="transposase"<br>/start_type="ATG"<br>/score=30.6 |
| gene |                                                                                                                                                                                                                                                                                                                                                                                                                                                                                                                                                                                                                                                            |
|      |                                                                                                                                                                                                                                                                                                                                                                                                                                                                                                                                                                                                                                                            |
| CDS  |                                                                                                                                                                                                                                                                                                                                                                                                                                                                                                                                                                                                                                                            |

|      |                                                                                                                                                                                                                                                                                                                                         |
|------|-----------------------------------------------------------------------------------------------------------------------------------------------------------------------------------------------------------------------------------------------------------------------------------------------------------------------------------------|
| gene | /codon_start=1<br>complement(10733..10939)<br>/rbs_motif="None"<br>/uscore="-6.49"<br>/rscore="-4.0"<br>/sscore="-6.86"<br>/locus_tag="6A_12"<br>/conf="95.28"<br>/ID="6A_12"<br>/cscore="19.93"<br>/partial=0<br>/tscore="2.5"<br>/gc_cont="0.357"<br>/rbs_spacer="None"<br>/start_type="ATG"<br>/score=13.1                           |
| CDS  | /codon_start=1<br>complement(10733..10939)<br>/rbs_motif="None"<br>/uscore="-6.49"<br>/rscore="-4.0"<br>/sscore="-6.86"<br>/locus_tag="6A_12"<br>/conf="95.28"<br>/ID="6A_12"<br>/cscore="19.93"<br>/partial=0<br>/tscore="2.5"<br>/gc_cont="0.357"<br>/rbs_spacer="None"<br>/product="transposase"<br>/start_type="ATG"<br>/score=13.1 |
| gene | /codon_start=1<br>complement(10953..11288)<br>/rbs_motif="None"<br>/uscore="0.62"<br>/rscore="-3.27"<br>/sscore="-5.6"<br>/locus_tag="6A_13"<br>/conf="99.68"<br>/ID="6A_13"<br>/cscore="30.54"<br>/partial=0<br>/tscore="-3.65"<br>/gc_cont="0.357"<br>/rbs_spacer="None"<br>/start_type="TTG"<br>/score=24.9                          |
| CDS  | /codon_start=1<br>complement(10953..11288)<br>/rbs_motif="None"<br>/uscore="0.62"<br>/rscore="-3.27"<br>/sscore="-5.6"<br>/locus_tag="6A_13"<br>/conf="99.68"<br>/ID="6A_13"<br>/cscore="30.54"<br>/partial=0<br>/tscore="-3.65"                                                                                                        |

|      |                                                                                                                                                                                                                                                                                                            |
|------|------------------------------------------------------------------------------------------------------------------------------------------------------------------------------------------------------------------------------------------------------------------------------------------------------------|
|      | <pre> /gc_cont="0.357" /rbs_spacer="None" /product="transposase" /start_type="TTG" /score=24.9 /codon_start=1 </pre>                                                                                                                                                                                       |
| gene | <pre> complement(11342..11452) /rbs_motif="GGAG/GAGG" /uscore="-0.67" /rscore="2.98" /sscore="3.63" /locus_tag="6A_14" /conf="92.25" /ID="6A_14" /cscore="7.14" /partial=0 /tscore="1.32" /gc_cont="0.387" /rbs_spacer="5-10bp" /start_type="ATG" /score=10.8 /codon_start=1 </pre>                        |
| CDS  | <pre> complement(11342..11452) /rbs_motif="GGAG/GAGG" /uscore="-0.67" /rscore="2.98" /sscore="3.63" /locus_tag="6A_14" /conf="92.25" /ID="6A_14" /cscore="7.14" /partial=0 /tscore="1.32" /gc_cont="0.387" /rbs_spacer="5-10bp" /product="transposase" /start_type="ATG" /score=10.8 /codon_start=1 </pre> |
| gene | <pre> complement(11534..11800) /rbs_motif="None" /uscore="4.06" /rscore="-3.27" /sscore="3.21" /locus_tag="6A_15" /conf="98.86" /ID="6A_15" /cscore="16.21" /partial=0 /tscore="3.07" /gc_cont="0.307" /rbs_spacer="None" /start_type="ATG" /score=19.4 /codon_start=1 </pre>                              |
| CDS  | <pre> complement(11534..11800) /rbs_motif="None" /uscore="4.06" /rscore="-3.27" /sscore="3.21" /locus_tag="6A_15" </pre>                                                                                                                                                                                   |

|      |                                                                                                                                                                                                                                                                                                                                                            |
|------|------------------------------------------------------------------------------------------------------------------------------------------------------------------------------------------------------------------------------------------------------------------------------------------------------------------------------------------------------------|
|      | /conf="98.86"<br>/ID="6A_15"<br>/cscore="16.21"<br>/partial=0<br>/tscore="3.07"<br>/gc_cont="0.307"<br>/rbs_spacer="None"<br>/product="transposase"<br>/start_type="ATG"<br>/score=19.4<br>/codon_start=1                                                                                                                                                  |
| gene | complement(12004..14640)<br>/rbs_motif="None"<br>/uscore="0.85"<br>/rscore="-3.27"<br>/sscore="-5.89"<br>/locus_tag="6A_16"<br>/conf="100.0"<br>/ID="6A_16"<br>/cscore="151.62"<br>/partial=0<br>/tscore="-3.48"<br>/gc_cont="0.37"<br>/rbs_spacer="None"<br>/start_type="GTG"<br>/score=145.7<br>/codon_start=1                                           |
| CDS  | complement(12004..14640)<br>/rbs_motif="None"<br>/uscore="0.85"<br>/rscore="-3.27"<br>/sscore="-5.89"<br>/locus_tag="6A_16"<br>/conf="100.0"<br>/ID="6A_16"<br>/cscore="151.62"<br>/partial=0<br>/tscore="-3.48"<br>/gc_cont="0.37"<br>/rbs_spacer="None"<br>/product="Calcium-transporting ATPase"<br>/start_type="GTG"<br>/score=145.7<br>/codon_start=1 |
| gene | complement(14817..16535)<br>/rbs_motif="None"<br>/uscore="-0.44"<br>/rscore="-3.27"<br>/sscore="-1.29"<br>/locus_tag="6A_17"<br>/conf="99.99"<br>/ID="6A_17"<br>/cscore="223.05"<br>/partial=0<br>/tscore="3.07"<br>/gc_cont="0.376"<br>/rbs_spacer="None"<br>/start_type="ATG"<br>/score=221.8<br>/codon_start=1                                          |
| CDS  | complement(14817..16535)                                                                                                                                                                                                                                                                                                                                   |



```

/rbs_motif="None"
/uscore="-0.44"
/rscore="-3.27"
/sscore="-1.29"
/locus_tag="6A_17"
/conf="99.99"
/ID="6A_17"
/cscore="223.05"
/partial=0
/tscore="3.07"
/gc_cont="0.376"
/rbs_spacer="None"
/product="anthranilate synthase"
/start_type="ATG"
/score=221.8
/codon_start=1
gene 16780..17019
/rbs_motif="GGA/GAG/AGG"
/uscore="-4.86"
/rscore="0.87"
/sscore="-1.09"
/locus_tag="6A_18"
/conf="71.95"
/ID="6A_18"
/cscore="5.18"
/partial=0
/tscore="2.91"
/gc_cont="0.35"
/rbs_spacer="5-10bp"
/start_type="ATG"
/score=4.1
CDS 16780..17019
/rbs_motif="GGA/GAG/AGG"
/uscore="-4.86"
/rscore="0.87"
/sscore="-1.09"
/locus_tag="6A_18"
/conf="71.95"
/ID="6A_18"
/cscore="5.18"
/partial=0
/tscore="2.91"
/gc_cont="0.35"
/rbs_spacer="5-10bp"
/product="phage protein"
/start_type="ATG"
/score=4.1
gene 17348..19597
/rbs_motif="GGAGG"
/uscore="2.44"
/rscore="14.48"
/sscore="19.33"
/locus_tag="6A_19"
/conf="99.99"
/ID="6A_19"
/cscore="462.93"
/partial=0
/tscore="3.07"
/gc_cont="0.409"

```

|              |                                                                                                                                                                                                                                                                                                                                                                                                                                                                                                                                                                                                                                                                                                                                                  |
|--------------|--------------------------------------------------------------------------------------------------------------------------------------------------------------------------------------------------------------------------------------------------------------------------------------------------------------------------------------------------------------------------------------------------------------------------------------------------------------------------------------------------------------------------------------------------------------------------------------------------------------------------------------------------------------------------------------------------------------------------------------------------|
|              | /rbs_spacer="5-10bp"<br>/start_type="ATG"<br>/score=482.3<br>/codon_start=1<br>17348..19597<br>/rbs_motif="GGAGG"<br>/uscore="2.44"<br>/rscore="14.48"<br>/sscore="19.33"<br>/locus_tag="6A_19"<br>/conf="99.99"<br>/ID="6A_19"<br>/cscore="462.93"<br>/partial=0<br>/tscore="3.07"<br>/gc_cont="0.409"<br>/rbs_spacer="5-10bp"<br>/product="5-methyltetrahydropteroyltriglutamate--                                                                                                                                                                                                                                                                                                                                                             |
| CDS          |                                                                                                                                                                                                                                                                                                                                                                                                                                                                                                                                                                                                                                                                                                                                                  |
| homocysteine |                                                                                                                                                                                                                                                                                                                                                                                                                                                                                                                                                                                                                                                                                                                                                  |
|              | methyltransferase"<br>/start_type="ATG"<br>/score=482.3<br>/codon_start=1<br>19741..20661<br>/rbs_motif="None"<br>/uscore="-0.0"<br>/rscore="-3.27"<br>/sscore="-0.21"<br>/locus_tag="6A_20"<br>/conf="100.0"<br>/ID="6A_20"<br>/cscore="132.52"<br>/partial=0<br>/tscore="3.07"<br>/gc_cont="0.396"<br>/rbs_spacer="None"<br>/start_type="ATG"<br>/score=132.3<br>/codon_start=1<br>19741..20661<br>/rbs_motif="None"<br>/uscore="-0.0"<br>/rscore="-3.27"<br>/sscore="-0.21"<br>/locus_tag="6A_20"<br>/conf="100.0"<br>/ID="6A_20"<br>/cscore="132.52"<br>/partial=0<br>/tscore="3.07"<br>/gc_cont="0.396"<br>/rbs_spacer="None"<br>/product="5,10-methylenetetrahydrofolate reductase"<br>/start_type="ATG"<br>/score=132.3<br>/codon_start=1 |
| gene         |                                                                                                                                                                                                                                                                                                                                                                                                                                                                                                                                                                                                                                                                                                                                                  |
| CDS          |                                                                                                                                                                                                                                                                                                                                                                                                                                                                                                                                                                                                                                                                                                                                                  |
|              | complement(20838..21644)<br>/rbs_motif="None"<br>/uscore="0.0"<br>/rscore="0.0"<br>/sscore="3.22"                                                                                                                                                                                                                                                                                                                                                                                                                                                                                                                                                                                                                                                |
| gene         |                                                                                                                                                                                                                                                                                                                                                                                                                                                                                                                                                                                                                                                                                                                                                  |

```

/locus_tag="6A_21"
/conf="100.0"
/ID="6A_21"
/cscore="160.85"
/partial=1
/tscore="3.22"
/gc_cont="0.399"
/rbs_spacer="None"
/start_type="Edge"
/score=164.1
/codon_start=1
complement(20838..21644)
/rbs_motif="None"
/uscore="0.0"
/rscore="0.0"
/sscore="3.22"
/locus_tag="6A_21"
/conf="100.0"
/ID="6A_21"
/cscore="160.85"
/partial=1
/tscore="3.22"
/gc_cont="0.399"
/rbs_spacer="None"
/product="phosphoglucosyltransferase"
/start_type="Edge"
/score=164.1
/codon_start=1

```

CDS

BASE COUNT      6509 a    3846 c    4297 g    6992 t  
ORIGIN

```

1  acgacgttgtt  aaaacgacg  ccagtgaatt  gtaatacgac  tcactatagg  gcgaattcga
61  gctcgggtacc  cggggatccc  acccttatgg  caataaaaga  tgcaattgaa  aaaattgttt
121  catattttga  tgccgacgaa  gtaacagatc  atgaagatgt  tgctaaagaa  cgtccagtta
181  aagtacagaa  aactgagcag  acaccacctc  aacagcaacg  taaacctgag  cgtcctcagg
241  aaacagtccc  tcctcgtcgc  caacatatca  aatcagacgt  acagaaaact  caagtccttc
301  gtagtttacc  tttgagtcga  tcacaagtta  atcagggatc  ccaacaaatg  aatacaacta
361  aaactactat  tgcaattaaa  tatectaaaa  aatatgaaga  tgctcaagaa  attgtagaac
421  ttttgattga  aaatgaatgt  gttttaattg  attttcaata  tatgttagaa  gcacaagctc
481  gtcgttggtt  agattttatt  gatggtgcta  gcaagggtact  tacaggaaac  ttacaaaaag
541  ttggttcttc  catgtacttg  ctacaccaa  tcaacgttgt  tgttgacatc  gaagagatta
601  gtttgagtca  tggaaatcaa  gaatctactt  ttgacttcga  catgaagaga  cgtaaagcca
661  tgtttgtatt  actatatgtt  atttgggcac  gtgttggtta  cttggttaga  atactccttg
721  taatctatgc  tttgttatct  tggtttccag  gagcttatga  tacagctctt  gggagacta
781  ttagacaaat  tgttcagcca  attcctgcac  catttcgtag  gctgaatttg  gtttttgctg
841  gtattgattt  ttcaattatc  gcaattatac  ttttggttaa  tttctctctt  agtattctta
901  aggttgctct  attttgatgt  ttgaagcaaa  aaatattgaa  caacattact  cgttagaaga
961  acgtcttttt  ttagaaaagg  ttaggggatt  ttgtcaatta  gttgaagatc  ggtatagccc
1021  atatttgact  gatttcttaa  atcctcgtga  aatccagatt  gtcaaagatt  tagcaaatta
1081  ctataattta  aaattctttg  taagttcaac  ttttgataac  gaagagtatg  gaagagtgat
1141  tcttgctccg  gattattatg  agcttgatga  agatgacttt  gaaattaaac  gattagagat
1201  ttcttatgct  agacaattta  ataaattgac  acatcccaaa  attttaggcg  cactgcttaa
1261  tcaacttggg  cttgaacgtc  aagtatttgg  agatgttatt  cttgatgaag  aaggccgagt
1321  tcaatttaac  attgcttctc  atctagcaag  ctatgcaata  atgactatta  ctaaaatcgg
1381  tagggtttcg  gttacgctta  gagaagtaag  taaagatgat  tggatttcca  atcaagaaaa
1441  atattctcaa  tcttttgtct  tgctttctag  tatgctgtct  gataatgtgt  tatctacagt
1501  attaaaaaca  tcgcgttcaa  atgcttttaa  gctaattgct  tcaggcaaaa  tcaaacttaa
1561  ttataggcaa  attgagaaat  ctgatcagat  aatatctatt  ggtgatatga  tttcggttag
1621  aggttttggc  cgatttcgtc  taggtcaaca  agaaggaatt  tctaaatcag  gaaaagccaa
1681  ggtcgtcatc  gacagtcttc  taagactaca  aaagtaggta  ttttaattta  aagcatcaga
1741  gatgctaatt  aaacttgagg  agatctgtaa  tgacaattat  agttcttgat  attatcgaaa
1801  aatagtttac  aactaaattt  tgtggatata  atgaacaaga  agtagatgat  tttctcgata

```

|      |             |             |             |             |            |             |
|------|-------------|-------------|-------------|-------------|------------|-------------|
| 1861 | ttatcgtaga  | tggttatgaa  | gatttagttc  | attgaaatcg  | tgaacttggt | gctcatgtaa  |
| 1921 | aagaacttga  | agaaatggta  | aaaaataaag  | gaggcctgta  | atggcaatca | cagcacttga  |
| 1981 | tattaaagat  | aaacagttta  | ccactaaatt  | tcgtggatac  | aatgaacaag | aagtagatga  |
| 2041 | atttcttgat  | attatcatag  | atgattatga  | agatttagtt  | cgtgacaatc | gtgaacttac  |
| 2101 | tactcgtgta  | aaagagcttg  | aagaaaaatt  | ggcttatttt  | gatgaaatga | aagaatcatt  |
| 2161 | gagccagtca  | gttatcttgg  | ctcaagaaac  | agctgaaaaa  | gttaaagctt | cagcagcaga  |
| 2221 | tgaatcagct  | aacttgatta  | acaaagccaa  | ctttaatgcg  | acacgcttga | tcgaagaagc  |
| 2281 | taaatctaag  | gcattctgaaa | ttcttcgtga  | tgctacagat  | gaagcaaaac | gtgttgctat  |
| 2341 | tgaaactgaa  | gagcttaaac  | gtcaaagtcg  | tgtttttcac  | caacgtcttt | tggctgcagt  |
| 2401 | tgaaagtcaa  | cttagcttag  | caagtgcctc  | agagtgggag  | gaattggtgc | aaccaacagc  |
| 2461 | tattttatctg | caaaactcag  | atggtgcctt  | taaagaagtt  | gttgaaaaag | tgctggatga  |
| 2521 | acatgttcca  | gattcaaacg  | atgccgcttc  | attcgatgcg  | actcgtcaat | tcactcctga  |
| 2581 | cgaaatggct  | gaacttcaac  | gtcgcgctgc  | tgaaagcaat  | aaacaagtta | aagattttctc |
| 2641 | taattcagat  | gttgacgaaa  | caaagtatat  | tacttcaact  | ccagtatat  | ttggtattga  |
| 2701 | agattcattc  | gaaagtgaag  | tagctaattt  | tccaatttct  | gcacctgtag | acgaggacaa  |
| 2761 | tgattcggaa  | caagaagtaa  | ctgttgaaaa  | aaatcttaat  | gaaacacaaa | cttttaaatt  |
| 2821 | aaatattagc  | gaataagaaa  | aacaaacttt  | tccaaatata  | ttaacagcga | gtgggagatg  |
| 2881 | gtgtgagtc   | tacattccct  | atttgggtag  | ttatcatttt  | ctagcattct | agctgaatta  |
| 2941 | agtaagctag  | aaggatggtc  | ctccttacgg  | acatttgagg  | gagcaatggt | acttgctcta  |
| 3001 | aactaagggtg | gtaccacgag  | cttctgcctt  | tttttgatga  | aggctctttt | tatttagtat  |
| 3061 | aaaaaaaaatt | aaagaggaga  | tataatgaaa  | cttaaagaaa  | cattaaatct | aggtaagaca  |
| 3121 | gctttttccaa | tgcgtgctgg  | acttccta    | aaagaaccaa  | tctggcaaaa | agagtgggaa  |
| 3181 | gaagcgaaag  | tgtatcaacg  | tcgtcaagag  | ttgaatcaag  | gtaaaccaca | cttcacactt  |
| 3241 | catgatggcc  | ctccttatgc  | caatggta    | attcacgtgg  | gtcatgcat  | gaataaaatt  |
| 3301 | tctaaggata  | tcattgttcg  | atctaaatca  | atgtctgggt  | tctatgctcc | atttattcct  |
| 3361 | gggtgggata  | cacatggttt  | gccaatgaa   | caggatttgg  | ctaagcaagg | cgtaaaacgt  |
| 3421 | aaagaacttg  | atcgcgctga  | ataccttaag  | atgtgtcgtg  | attatgcact | ctcacaagtt  |
| 3481 | gataagcaac  | gtgaagattt  | caaacgtctt  | ggatatttcag | ctgattggga | aaatccttat  |
| 3541 | gttaccttga  | caccagacta  | tgaggcagcc  | caaaccgtg   | tctttggcga | aatggctaaa  |
| 3601 | aagggttata  | tctatcaagg  | tgcgaaacct  | gtatactgg   | catggtcatc | agaatcggca  |
| 3661 | cttgctgaag  | cagagattga  | atatcatgat  | ttggtttcaa  | catctcttta | ctatgccaat  |
| 3721 | aagggttaaag | atggtaaagg  | tgtttttagat | actgatactt  | atattgttgt | ttggactaca  |
| 3781 | acaccatttta | cagtgcacagc | ttcacgtgg   | ttggctgtag  | gtgcagatat | tgagtatggt  |
| 3841 | cttgtaaaac  | ctgctggaga  | aactcgtaag  | tttattgttg  | cttctgaatt | gctaaatagt  |
| 3901 | ctttctgaga  | aatttgcttg  | ggaagaagta  | gaagtcttta  | atacttaccg | tggtgatgaa  |
| 3961 | ttaaatacaaa | tcgttacaga  | gcacccttgg  | gacagtgaag  | ttgatgaact | tgtaattcct  |
| 4021 | ggtgagcatg  | ttacaacaga  | ctctggtaca  | ggtatcgctc  | atacagctcc | tgggtttggt  |
| 4081 | gaggatgact  | ataacgtagg  | tggtgcta    | ggtcttgagg  | ttgtagtaac | tgtaaatgaa  |
| 4141 | cgtggaatca  | tgatggaaaa  | cgccggtcct  | gattttgctg  | gtaaattcta | cgataaagta  |
| 4201 | gctccgattg  | ttatggagaa  | acttgagat   | ttacttcttg  | cgaaagaaga | aatctctcac  |
| 4261 | tcatacccat  | ttgactggcg  | tactaagaaa  | ccaatcatct  | ggcgtgcagt | gccacaatgg  |
| 4321 | tttgcatctg  | tttctaaatt  | ccgtcaagaa  | atcttgatg   | aaattgaaaa | agttaaattt  |
| 4381 | cattctgagt  | ggggtaaagt  | tcgtctttac  | aacatgattc  | gtgaccgtgg | tgactgggta  |
| 4441 | atcttctcgtc | aacgtgcttg  | gggtgttcca  | ctcccaatct  | tctatgctga | agatagaaca  |
| 4501 | ccaatcatga  | ctgaagaaac  | gattgaagat  | gtagctaaac  | tttttgaga  | gcatggatca  |
| 4561 | gttatttggt  | gggaacgtga  | tgccaagat   | cttcttccag  | aaggtttacc | acatccaggt  |
| 4621 | tcaccaaattg | gtgagttcac  | taaagaaaat  | gatattatgg  | atgtgtgggt | tgactcagga  |
| 4681 | tcgtcatgga  | atggtgttgt  | tgtaaaccgt  | ccagagttaa  | catatccagc | tgatctctat  |
| 4741 | ctcgaagggtt | cagaccaata  | ccgtggttgg  | ttcaactcat  | cacttatcac | ctcagttgcc  |
| 4801 | aaccatgggtg | ttgcaccata  | taaacaactc  | ttgtctcaag  | gttttgact  | tgatggtaag  |
| 4861 | ggtgaaaaga  | tgtccaaatc  | tcttggaat   | acaattgctc  | ctagtgatgt | tgagaaacaa  |
| 4921 | tttggtgctg  | aaattcttcg  | tctttgggta  | acaagtgtag  | atactagcaa | tgatgttcgt  |
| 4981 | atctcaatgg  | atataccttag | ccaagtatca  | gaatcttatc  | gtaagattcg | taacacactt  |
| 5041 | cgtttcttga  | ttgctaatac  | ttctgacttc  | aatccaacaa  | ctgatgcagt | agcatttgaa  |
| 5101 | gatttgcgct  | ctgtcgatca  | atatatgact  | attcgtttta  | accaattggg | taagaatatt  |
| 5161 | cgtgatgcct  | atgaaaactt  | cgaattcttg  | actatttaca  | aatctttagt | taacttcatt  |
| 5221 | aatgttgaat  | tgtcagcctt  | ctatcttgat  | tttgctaaag  | atgtcgttta | cattgagagt  |
| 5281 | gctaaatcac  | ttgaacgtcg  | tcaaagtcaa  | acagtcttct  | acgatattct | tgtaaagatt  |
| 5341 | acaaaactct  | tgactccaat  | ccttcctcat  | actgcagaag  | aaatttggtc | atatcttgaa  |
| 5401 | tttgaaaatg  | aagactatgt  | tcaattgtca  | gagttgccag  | aagcagaaga | ctttgcta    |
| 5461 | caagatgcac  | ttcttgaaaa  | atggaatgcc  | ttcatggact  | tccgtggaaa | agctcaaaaa  |

|      |             |            |             |             |             |             |
|------|-------------|------------|-------------|-------------|-------------|-------------|
| 5521 | gcttttgaag  | aagctcgtaa | tgaaaaagtt  | attggtaa    | cgcttgaagc  | tcatttaact  |
| 5581 | atctatccag  | atgctgaagt | aaaagaactt  | ctcgaaagtt  | tgaatactaa  | ccttgctcaa  |
| 5641 | cttttgattg  | tttcagctct | aactattgct  | gaaggagatg  | ttcctgaatc  | tgctgtaaga  |
| 5701 | ttccaaggtg  | tttcattcac | agtagaacgt  | gctgaaggtg  | aagtatgtga  | ccgttgctgt  |
| 5761 | cgtattgatc  | caactactaa | agaacgtagc  | tacaacgcga  | ctatatgtaa  | tcactgtgct  |
| 5821 | agcattatcg  | aagaaaactt | tgctgaagtt  | gtggcagaag  | gtttcgaagt  | tttaaaagca  |
| 5881 | aaataagcta  | aaaagagttg | ctctttgtta  | gctgtagtgg  | gtgacgaaaa  | gataacatct  |
| 5941 | agagaggacc  | atataggtct | tctctttttg  | aatgttcaga  | gtgatgaaaa  | cacgcttcct  |
| 6001 | aaaggtgata  | gaggttgtga | taattagcga  | actcttctga  | gaaatccagt  | gtcttctcaa  |
| 6061 | ggacttcatg  | tgggtttaag | gtttgacaaa  | aggttttcga  | atgaaatgat  | ttacgagata  |
| 6121 | acttacggct  | gtcctttttg | gagagtcacc  | agtgattttt  | taaattctcaa | taaggtagtg  |
| 6181 | aatttttatt  | aaactggttc | ataatggcaa  | ttcttgtctt  | taaaaagggt  | cgatcaagct  |
| 6241 | gctagatgat  | gttgaaacga | tcaataatga  | tttgggcatt  | tagaaaaagt  | cttcgaactt  |
| 6301 | agtggcatat  | aaagctcctg | acatatccat  | cgtgataaac  | cttacctttt  | ggcgtacttt  |
| 6361 | caatggatac  | ttcaaaaaga | agtttcgact  | agtggtttgg  | cggcgattat  | cgaggatggg  |
| 6421 | tatgagtttg  | ttgttctcat | agttttgagc  | cacaaaagcg  | aattcacctt  | tcttgaaact  |
| 6481 | aaactcatcc  | caggacataa | cagctggtag  | tttgtcataa  | tgttccttga  | aattaaactg  |
| 6541 | gtcaagtttg  | cgatagacag | tggacgtcga  | tacatgaagt  | cttctggcaa  | tatccgtaag  |
| 6601 | tgatatcttc  | tcagttagga | gttgtgagac  | cttttgtcgg  | actagatttg  | aaatttggtg  |
| 6661 | gttttttctca | acgatatatg | tctcagaccc  | cgtgacttgc  | ctacaacttt  | cacactggaa  |
| 6721 | gcgacgcttt  | ttaagacgta | gtagtatttg  | tattccagtt  | ttgcttgaac  | ctcgatatga  |
| 6781 | atatccgctt  | caaaaacaag | agaaataatg  | atgttagggg  | ctttaattcc  | gattaatttt  |
| 6841 | gtggtattct  | tcataagtct | cataagttct  | tcctaataat  | ggttttgtcg  | ctcttcatta  |
| 6901 | tagttcttat  | gggacttttt | gtgtataact  | aaaaagctct  | ataatctcta  | cagtggtttt  |
| 6961 | accactaca   | gaaattatag | agcctcta    | cgttgcttgc  | gtgcgtccgt  | cgaggattgt  |
| 7021 | gatgactttt  | aatgagtcga | aatcctgagc  | gatgaaactc  | atttttccct  | tcttgaagcc  |
| 7081 | gtactcatcc  | cagctcatat | tctcaggcag  | ccaattccag  | tcggttttta  | attggaactc  |
| 7141 | atthagcttg  | cgactgacgg | ttgaggtaga  | gacggcaagg  | cgcttggcaa  | tgctcggtcat |
| 7201 | agactgtttt  | tcaatgagca | attgagcgat  | tttctgatag  | acgacgggtg  | cgatttggtg  |
| 7261 | attcttcttg  | accagagaag | tttccgcgac  | agccattttt  | ccgcactcct  | tacacttgaa  |
| 7321 | acggcgcttt  | ttcaggcgaa | tgagagttcg  | gtagccagca  | cactccagat  | acgggatttt  |
| 7381 | agaggctttc  | tgggaagtcg | atttgcccat  | ctgtcccctg  | caggcaggac  | atttaggaga  |
| 7441 | ctcgtaatcc  | aagtaaccgt | gaagttcttt  | gtgcgttccc  | atatacgtat  | cattagtgat  |
| 7501 | gataaatatt  | ttgtctttta | ttccaagaaa  | atltgtgata  | agatttagtt  | gttccatatg  |
| 7561 | attcttttcta | aaatgatggg | ttagtgcgtt  | ttcattatag  | gtcatatggg  | actttttttt  |
| 7621 | ctacaatcaa  | aaaggctcca | taatctccat  | agaggattta  | cccactacag  | aaattataga  |
| 7681 | gccggaatgt  | tatgtagttc | aggctctttg  | tcaactgtag  | tgggtagatg  | aaaagctaaa  |
| 7741 | ttcttgagag  | gaccagtttg | gtcttctctt  | ttttaatatt  | tactgccatc  | aaaatccgtt  |
| 7801 | tcttaaagtt  | ttcaaagttc | ctgaagccaa  | aggcatttcg  | cttaatgacc  | ttgatgagat  |
| 7861 | tgttcgttgc  | ttccagtttt | gcgtttgaat  | acggcagttc  | gagggcggtg  | ataatcttgt  |
| 7921 | ctttatcttt  | caaaaaagtt | ctaaaaactg  | tctgaaaagt  | aggggtgtacg | ctggaactcg  |
| 7981 | tctcttcaat  | gaggtcaaag | aaatgggtccg | agttcttctc  | ttggaaatgg  | aaaagtaaaa  |
| 8041 | gttggtagag  | ttcataatgt | tctctcagtt  | cttgagagta  | tgacagtagc  | ttttctagga  |
| 8101 | tttccttggt  | ggttaaatgc | gcacgaaaag  | tcggacgata  | aaagcgttta  | tcgttgagtt  |
| 8161 | tgcgactatc  | ttggttgcac | agtttccagt  | agcgtttcag  | ggcacgatat  | tctgtgact   |
| 8221 | gtgagttcca  | atggttcatg | atltgaaatg  | ggacgcggtt  | catagcacga  | cttaagtggt  |
| 8281 | gcacaatgtg  | aaagcgatca | aggacaatct  | tagcgtttagg | gaataatttt  | ctggcgatgt  |
| 8341 | cgtaataagg  | gctaaacatg | tccatagtga  | tgacttttaac | gcgattttcta | tcctgtctgg  |
| 8401 | aatagcgtag  | gaagtgggtt | ctaatacgtt  | cttgcggtgcg | tccgtcgagg  | attgtgatga  |
| 8461 | ctttttaatga | gtcgaaatcc | tgagcgatga  | aactcatttt  | tcccttcttg  | aagccgtact  |
| 8521 | catcccagct  | catattctca | ggcagccaat  | tccagtcggt  | tttaaattgg  | aactcattta  |
| 8581 | gcttgcgact  | gacggttgag | gtagagacgg  | caaggcgctt  | ggcaatgtcg  | gtcatagact  |
| 8641 | gttttttcaat | gagcaattga | gcgattttct  | gatagacgac  | ggttgcgatt  | tggtgattct  |
| 8701 | tcttgaccag  | agaagtttcc | gcgacagcca  | tttttccgca  | ctccttacac  | ttgaaacggc  |
| 8761 | gcttttttcag | gcgaatgaga | gttcggtagc  | cagcacactc  | cagatacggg  | atlttagagg  |
| 8821 | ctttctggaa  | gtcgtatttg | cccactctgt  | ccttgaggc   | aggacattta  | ggagactcgt  |
| 8881 | aatccaagta  | accgtgaagt | tctttgtgcg  | ttcccatatc  | gtattcatta  | gtgatgataa  |
| 8941 | tatttttgtc  | ttttattcca | agaaaatttg  | tgataagatt  | tagttgttcc  | atatgattct  |
| 9001 | ttctaaaatg  | atgggttagt | cgcttttcat  | tataggtcat  | atgggacttt  | ttttctacaa  |
| 9061 | tcaaaaaggc  | tccataatct | ccatagagga  | tttaccact   | acagaaatta  | tagagccctt  |
| 9121 | tttatgtatg  | ttcagtgatg | tgaagacacg  | tttcttaaa   | ttgatgaagt  | ttctaaaacc  |

|       |             |             |            |             |             |             |
|-------|-------------|-------------|------------|-------------|-------------|-------------|
| 9181  | gaagcccaag  | cgtttaatgt  | ctttaattaa | cttattagtc  | gcttcaagtt  | ttgcgtttga  |
| 9241  | atagtctgtt  | tctagtgcac  | tttgatgtga | ttgcttgtgt  | ctaagaaaag  | tcctaaagac  |
| 9301  | cgtttgaaaa  | tagtgattga  | ccttgcttct | atcttctct   | atcaggtcaa  | agaactcacc  |
| 9361  | tactctcttc  | tcctgaaagt  | gaaaaagcaa | aagctgataa  | agtgtatagt  | agtcagtaag  |
| 9421  | ctcttttgaa  | aagactagt   | tcttcttaac | aacttcatgt  | ggtgctaaag  | tttggcggaa  |
| 9481  | agtctttgaa  | tagaaagagt  | tgagagataa | cttacagctg  | tccttttgga  | agagtcgcca  |
| 9541  | gtgatttttc  | aaggctcgat  | agggtagtga | cttcttatcg  | aactggttca  | taattgcaat  |
| 9601  | tctagtcttt  | aaaaaggcac  | gtccaagggt | ctggatgatg  | tggaaacgat  | caagaacgat  |
| 9661  | ttttgcgttt  | ggaaagagct  | tgcgagccag | tggaaataaa  | gctccagaca  | tatccatcgt  |
| 9721  | gataaactgt  | acctgttgcc  | ggactttcaa | tggatacttc  | aaaaagtagt  | ttcgtatagt  |
| 9781  | agtttgccgg  | cgattatcaa  | ggatggttat | gagttggttt  | gtctcataat  | tctgcgccac  |
| 9841  | aaaagccaat  | tcccccttct  | tgaacccaaa | ctcatcccag  | gacataacag  | cagggagttt  |
| 9901  | gtcataatgt  | tccttgaaag  | tgaactgata | aagcttacga  | tagacagtgg  | acgtcgacac  |
| 9961  | gcgaagtctt  | cttgcaatat  | cagttagtga | caccttctca  | gttagaagct  | gtgtaacttt  |
| 10021 | ttgtcggact  | agattggaga  | tttggcagtt | tttctcaacg  | atagatgtct  | cagctaccgt  |
| 10081 | gactcttcta  | caacttttac  | actggaaacg | acgttttttt  | cagacgtagt  | agagttggcg  |
| 10141 | ttcccgcttg  | ctcgagaaga  | gggattttag | aaggcttttg  | aaagtcgtac  | ttgatcatct  |
| 10201 | ttccatggca  | gtgaggacat  | gatggcgag  | ggtaatcgag  | ttttgcttga  | atctcgatat  |
| 10261 | gagtatcagt  | ttcaaaaaca  | agtgaatctt | tgataatttg  | gtctttaatt  | ccgattaatt  |
| 10321 | ctgtgggtatt | cttaataggt  | ctcataagtt | cttccctaag  | gtagttttgt  | cacttttcat  |
| 10381 | tatagttctt  | atgggacttt  | tagtgtacac | tcaaaaagct  | ctataatctc  | tacagtagtt  |
| 10441 | ttaccacta   | cagaaattat  | agagccgttc | tgtattgcac  | aggaccaagt  | ccttttaatt  |
| 10501 | ttaccttaat  | gcgtttgttg  | ttgtaataat | caatatagtc  | tacaatagct  | tgttccaatt  |
| 10561 | gctcaagtga  | gtgaaacatc  | ttctcgtaac | cataaaacat  | ctcagactta  | agaatatcaa  |
| 10621 | agaaagactc  | catcatacca  | ttgtctggac | tatttccctt  | acgtgacatg  | gatggttgga  |
| 10681 | tccctttatc  | ctctaaaaat  | tgatgataat | actgatgttg  | gtattgccaa  | ccttaatcac  |
| 10741 | tatggagaat  | tgtattttca  | taatgctcct | ctgtgaagga  | ctggctctaac | atagattttca |
| 10801 | cttgttctaa  | gtttggtgaa  | gttgagagat | tataagcgat  | aatttcgctg  | ttgaaaccat  |
| 10861 | ctaaaacagg  | cgataaatac  | aatttatgtg | tgctatttgg  | aatggcaaac  | tctgtcacat  |
| 10921 | ctgtgtagca  | cttttccatt  | gggttggtcg | cttcaaactg  | ccgttggtata | agggttatct  |
| 10981 | gctttcttgc  | caacttctcc  | ttggtatgaa | gaataacttg  | gtttacgaca  | aatttgggaa  |
| 11041 | cttaaaccaa  | ggagcttcat  | cagacgtttg | accttcttat  | ggttcactac  | aaaaccacga  |
| 11101 | ttcctcaatt  | caagagttat  | tcgacgatat | ccgtaatttc  | ccttatgttc  | atcataaatg  |
| 11161 | gcttgtattt  | ccactttgat  | agattgattt | ttatctactt  | gatttagttt  | ctttaagtgg  |
| 11221 | taataatagg  | ttgaacgagc  | aagtttgata | atgttttagaa | ggatatctaa  | aggaaactct  |
| 11281 | gttaccaatc  | cttgaacaat  | ttctgttttt | cttcttgctc  | cttttcgtcc  | ctcaatcgga  |
| 11341 | gttatctcaa  | ctttttttaga | atagcattct | ccgctctcag  | gtactcattt  | tctgcttgaa  |
| 11401 | gacgttctaa  | ctctgtcatc  | tcttcgggtt | tcttcttttg  | cttactaccc  | attttaggta  |
| 11461 | ctctccctcc  | tcttttctca  | agaagagtat | acccattttt  | cttgtattgt  | gctatccaat  |
| 11521 | tgtaagcaa   | cccttaattt  | gagaggccat | agtccaggca  | aacactttgt  | tgagaacaac  |
| 11581 | cttcaagtag  | aactttatca  | atcatttctc | gctttaattt  | aggagaataa  | taacgattct  |
| 11641 | ttcccttttt  | gatgatgttt  | attccataat | ggtcaattaa  | tttcaccata  | tattttagac  |
| 11701 | cagaaacggt  | caccccaaat  | tgatttgaaa | gtcgtttaaa  | gctttctcct  | tgattttctca |
| 11761 | attcatatat  | ttgaacttta  | tcttcataag | ttagtttcat  | aataaaaaaca | ccccaaaagt  |
| 11821 | tagatttttt  | tgtttttgct  | taacttttgg | ggtgcagttc  | attttaaacc  | ttttttgta   |
| 11881 | tagagcaata  | atagaataat  | attgctctta | tttttcatag  | gttaccttta  | gaaattttaga |
| 11941 | aaaaggattg  | gaagtaaaac  | ctagtccttt | ttatcacttt  | gaagatttgc  | aatacctcat  |
| 12001 | atcttatttg  | tttttagtta  | gagcttttcg | aatgaaatct  | gctgggtataa | tcaatacagc  |
| 12061 | aataagaaga  | gcaatgatat  | agtgttgaat | atccatcgga  | acagtactaa  | atacttttcc  |
| 12121 | accaaattga  | ataataaggg  | tttgaacaac | agcaatagaa  | atcataacga  | ttaagaattt  |
| 12181 | cttgttttta  | ccgatatgtt  | caaaaatatt | gaagccatta  | ctacgtgtat  | taaatgagtt  |
| 12241 | gaaaataaca  | gcatagataa  | atactgtaaa | tgtaaagggt  | gttaccattt  | caaagttacc  |
| 12301 | agttccattt  | gtgataaagt  | cttgataacc | accaacattt  | ttaagaatgg  | ctaaacatac  |
| 12361 | aagagtaatg  | aaggcacttg  | caactccgat | agcggatttc  | atataaccag  | taagaatatt  |
| 12421 | tgctttctta  | gctactggtt  | tttcgttcat | ataacgatct  | agcgcaggct  | cttcacccaa  |
| 12481 | ggcaagggca  | gcaagtgtgt  | ccatgataag | gttaaccag   | agaatttgga  | tgattgtaaa  |
| 12541 | tggctctttg  | agacccaaaa  | gtggcgagag | aagtgacatg  | gcaatagttg  | ttacgttaac  |
| 12601 | agttaattgg  | aagatgataa  | atttacttac | tgacttactc  | atggtgcgtc  | catagagaac  |
| 12661 | agctttctca  | atagaagtca  | atgagttggt | taagataacg  | atatctgagg  | cttcacgtgc  |
| 12721 | gacttcagta  | ccgtcaccca  | ttgagaaacc | aacatcagct  | gatttaaggg  | ctggtgagtc  |
| 12781 | attgacccca  | tcaccogtca  | taccagctac | catatcgagt  | tcttgagctg  | cctcaataag  |

|       |             |             |             |             |             |             |
|-------|-------------|-------------|-------------|-------------|-------------|-------------|
| 12841 | acgttttttta | tccattggaa  | gggcacgact  | taccactttt  | aagtgaggca  | attgttgttt  |
| 12901 | aagttcttga  | tctgagaggg  | cagaaagttc  | atcgtgagta  | aggacaagg   | cattttctcc  |
| 12961 | agtgcagata  | cctgcttctt  | tagcgatagc  | aacagcgggt  | tctttacgg   | caccggttac  |
| 13021 | cataactact  | tgaacacccg  | cacggttcat  | tgtttcaacg  | gtttgtttaa  | ttgaagagcg  |
| 13081 | aacattatca  | cggatacata  | cgataccaat  | caagacttta  | tcattaccat  | ctgtattgag  |
| 13141 | gatggcaagc  | aaacgcattg  | aacggttagc  | ttgttccaat  | gataactcct  | gaaaacgagc  |
| 13201 | tttaatatca  | tctgtaaagt  | tttgtttatg  | accatcttta  | tcaagatagt  | agtagcagtc  |
| 13261 | atntagata   | aattctggag  | cacctttgat  | gtatatTTTT  | ccatcgttag  | tcgttacact  |
| 13321 | tgcgaatttt  | gttgctgagt  | tgaattgttg  | cttctcagta  | attgtattag  | tatcgaaatc  |
| 13381 | aagttgagaa  | cgtccaatca  | agaagtcaag  | aagtgcacgg  | tcagtagcat  | tactaccaac  |
| 13441 | agcattacca  | tcagcaacca  | tggcatcggt  | attaagaccg  | ataccattaa  | ttatttcagc  |
| 13501 | tttaagacta  | tctgacatcg  | tatcaaaatc  | tggagcatcg  | gtttcaccag  | tagctgcata  |
| 13561 | aagtgttcca  | tccccaagga  | agaagtcaac  | tacagatagt  | ttaccttctg  | tgattgtacc  |
| 13621 | agtcttatca  | ctgaagagaa  | tattcatgta  | tccagcagtt  | tcaatagtat  | caggatggcg  |
| 13681 | gactaggata  | ttttgagcta  | aaagtcgacc  | tgagttcatt  | gaggaaacga  | gtgctaacat  |
| 13741 | cattggaagt  | ccttctggga  | cagccatgat  | gatgattgta  | accgcaaaga  | gaattgtttc  |
| 13801 | aatgataaga  | aggaaaatcg  | agccaccatt  | gaggttggtt  | gctttattta  | gggcaataaa  |
| 13861 | gcctaataca  | aggttgatta  | ctgaataggc  | agcacctgca  | ctataaccga  | ggaccccgat  |
| 13921 | gtttcttgca  | agcttggtta  | gtttttcttt  | agatggtgaa  | tttttactat  | cttcttgaag  |
| 13981 | agacgtattg  | atacttcccta | aaacggtggt  | atcaccaatt  | tgtgtagctt  | caatcacagc  |
| 14041 | ttcatctgaa  | gttacgactg  | taccacggaa  | gaccttaaac  | tccgtaaaga  | ggtctgaaga  |
| 14101 | atctggctct  | tctcggtcac  | caagagggaag | ttttgtggca  | tcctcgcttt  | caccatttaa  |
| 14161 | gacagcttgg  | tttactttta  | atttaccttc  | caagatgata  | ccgtcaactg  | gaatcttgct  |
| 14221 | ccctgattga  | aggagaattt  | gatccccctt  | tacaacatca  | tccacgagaa  | tctctttaag  |
| 14281 | tttaccatct  | cgataaacct  | tagcattagt  | ttttgaagcc  | tcttcttgga  | gaatattgaa  |
| 14341 | tttttgctca  | ttacggtatt  | gagagactgc  | tgagaaccct  | gtagacatca  | aaatggcaaa  |
| 14401 | aattagttag  | atagcctcat  | accaatttag  | ctcccccaata | gcaggaaaaa  | tcattgcaac  |
| 14461 | aaagttgaag  | atgattttta  | atcctaaggc  | agccaagagg  | atgagaatcc  | attgatcctg  |
| 14521 | gaaggcttca  | ataaaaattg  | aaagcagcga  | gtagcctct   | ttactagaga  | gcctattatc  |
| 14581 | gccatgagcg  | tttttacttg  | cttgaacttc  | tgcagaagtc  | aagcctttta  | attttttcat  |
| 14641 | taaacgtatt  | tatcctttct  | agaatgttca  | aaaatttaaa  | acctaataga  | agcagtaatt  |
| 14701 | ttaataacta  | tcagtaagta  | ttatacttta  | ttttactatt  | aaattggtga  | ttttttatca  |
| 14761 | agagaagtag  | tgattgattt  | ctagaaaatg  | aaatttcaca  | attttaaatac | catatttttag |
| 14821 | aaatctaccc  | tcaattcata  | caaccctctc  | acagcattac  | agccatagat  | ggcttgagcc  |
| 14881 | tgtttttaaat | cttccagagt  | caaaactttc  | tctgtgacct  | gattattagc  | aatgaggctt  |
| 14941 | tgtctgtaaa  | taccgtttaa  | aagaccgagg  | tgaacagggt  | gagtgtagag  | ttggctcctg  |
| 15001 | attttaagaa  | cgaggttacc  | gatagaagtt  | tctaaaagtt  | ctttcttttg  | attatagtag  |
| 15061 | atttgctcat  | gaggctcctag | actaatgtgt  | ggtcgataac  | ttgttttaaa  | gtaggtatag  |
| 15121 | gggttattca  | aaggatgtgt  | ttgcttaact  | aatcttgctt  | gacaaaaatc  | atcgtctaata |
| 15181 | tctgttaatt  | gagcatgttc  | aaaagtaagt  | ttaccatctt  | ttgcaaggga  | caatttaaga  |
| 15241 | cggtagtctg  | tgtcaaaaatc | aagggactga  | cacaaatctt  | cgacttgatt  | ttgaacttct  |
| 15301 | tttttattga  | aaggataagc  | aaaatagcga  | ctggactctt  | gtagacgatt  | gagatgttct  |
| 15361 | ttaagatgga  | gtagtttacc  | ttgatgaatc  | cgtccagttg  | agataagatc  | aaatctagga  |
| 15421 | ttttgacggg  | atagaatagc  | tgatttttgc  | cttgtttctt  | catattccagc | ttcccatttg  |
| 15481 | ctgtcccagg  | tgattccacc  | gcctactcca  | tatatagcat  | tgtttccctg  | catttgtaagt |
| 15541 | gttcgagtag  | ctacggtgaa  | aatagttggt  | ccattaggtt  | gcaagatacc  | aatgggtcca  |
| 15601 | caatagacgc  | ctcgagcttg  | tttttcgacg  | tttttaataa  | ttgccatagt  | agctattttt  |
| 15661 | ggtgctcctg  | taatagatcc  | acaaggaaaa  | agggcttgga  | agatgtcatc  | caaacgactg  |
| 15721 | tttggttagga | gttgcgctct  | aatagttgaa  | gtcatttgcc  | aaacagtaga  | gtattgttca  |
| 15781 | acctggcaaa  | gtcttttttac | attttcactc  | cctatttttg  | aaatacgatt  | catgtcattt  |
| 15841 | ctaagaagat  | ctacaatcat  | catatttttca | gagcgatttt  | tctgatcatg  | agcaagccat  |
| 15901 | tgtgcttggt  | taaggctcagt | ttcagttgtc  | aagccacgat  | ttgttgctcc  | tttcatagga  |
| 15961 | cgtgtggtca  | atatatcacc  | atctttttta  | agaagaggtt  | caggacttat  | ggaaatgatg  |
| 16021 | gagacatcat  | catgttgaat  | aaaggcattg  | taatgtgcat  | tttgctcaac  | aaccaatcgg  |
| 16081 | ttgtagatgg  | caaattggatc | agctgttatg  | ttctgttgaa  | gttgagcggg  | aaaattgacc  |
| 16141 | tggtaggtgt  | ttccttgacg  | aatatggtgg  | tgtatatgct  | caatagcagc  | cttgatttcc  |
| 16201 | tctgcagaag  | ttagttcttg  | ccaagattct  | ggtaaggga   | caggctcata  | agcaagaggg  |
| 16261 | atagactctg  | tttgaacagt  | atcgtgaata  | gtaaaataga  | gaagatactc  | tgacattaat  |
| 16321 | gggctatcaa  | aaatttgaaa  | tttaggttca  | aaggcctgag  | aagcttcata  | ggctacatag  |
| 16381 | cctacagcaa  | aatagccttt  | ttcttgatag  | gcttctattt  | gattttataag | tgattttaact |
| 16441 | tccttaatgt  | ctttgggtttt | tatctctttt  | atggcgtgag  | tgaagatttg  | tctgacgcca  |

|       |             |             |            |             |             |             |
|-------|-------------|-------------|------------|-------------|-------------|-------------|
| 16501 | agttctttaa  | aatcaataac  | ggttttctta | tgcatacata  | gagtataaca  | taagaagata  |
| 16561 | gcctctgggt  | ctttttcatg  | atttaattct | ctttcttaaa  | attttaacca  | aaaatgaact  |
| 16621 | tttcagatag  | ttttatata   | gttataataa | tatgaactaa  | aagaagattt  | tagagggaaa  |
| 16681 | tatgactaaa  | aaaaaataaa  | tttgagaaag | gggacagtag  | tctttcaaat  | aaaaaaattg  |
| 16741 | aaaaaagtga  | cttccaagcg  | gaattcttgg | aaacatcaaa  | tgtacgagct  | tgagattgcc  |
| 16801 | attgcaaaaag | agtcaagcaa  | taaaaagaga | gacgagctta  | taaaacttca  | taatggctat  |
| 16861 | atgagtgagt  | atgatagttt  | aaagaagcaa | atcatttggg  | tagcagtatt  | gggaatatgt  |
| 16921 | ttcctagtg   | tcttggtgat  | tttgggctat | tttatttggg  | atagctataa  | cagtgagaac  |
| 16981 | atgtcctata  | catcttcttg  | gcttcaagaa | cgagtttaag  | atthagtttt  | gattaaaacg  |
| 17041 | ccttatttta  | tgactttact  | acgcaatagt | gaacatagat  | gagttgatta  | ctaaatatta  |
| 17101 | aagaagaaaa  | agtaagatat  | atctctagac | aaaagtctag  | agtttttttt  | tgataaaaat  |
| 17161 | gaccttatca  | tctccctata  | tagttattag | ctatacaaat  | atctaattaa  | aaataagaca  |
| 17221 | acgataccag  | aaatccttta  | ttttatagga | tatagtttaa  | aactatatat  | attgaaaact  |
| 17281 | gataacaatt  | atacagatat  | ttatttcttt | ggtaagatta  | aatcaacaac  | aaagaggagg  |
| 17341 | acacaagatg  | tcaactacta  | tcattgggtt | cccacgtttg  | ggtgaattcc  | gagaattaaa  |
| 17401 | atttactaca  | gaaaaatatt  | ttagaaatga | aattactgca  | gacgaacttt  | tagcggctgc  |
| 17461 | taaagatttg  | cgtgcaaaac  | actggaatat | tgttaaagaa  | aaaggtatta  | ctgaaattcc  |
| 17521 | ttcaaatgac  | ttttctcatt  | acgataactt | ccttgatgcg  | gccttccttt  | tcaacgtagt  |
| 17581 | tcctgagtct  | gtgaaaaact  | tggatttgac | tgaattggaa  | caatactttg  | ctttggcacg  |
| 17641 | tggttaccaa  | ggtgaaaagg  | gggatgtgcg | tgctcttcca  | atgaagaaat  | ggttcaacac  |
| 17701 | caactacat   | tacatcggtt  | caaaatttga | aaaaacaaca  | gcagtaaaat  | tggtggtca   |
| 17761 | caagattttt  | gatgagtacc  | aagaagccaa | agacttgggt  | ctggatactc  | gccagttgt   |
| 17821 | ggttggacca  | ttcactttcc  | ttcaattgtc | tgatttcgaa  | gatggtgtga  | aagcagaaga  |
| 17881 | cttcgtcgat  | agctttattg  | ctgcctacca | agatgtcttt  | gcaaaattgg  | ctgaacttgg  |
| 17941 | tgctactcgt  | atccaacttg  | atgaaccagc | acttgttaaa  | gatttgactg  | ctgacgaaaa  |
| 18001 | agcactcttc  | ttgaatctgt  | acaataaaat | cttggctgac  | aagaaaggcc  | ttgaggtctt  |
| 18061 | gattcaaact  | tactttggtg  | atgttcgtga | tgtatacaat  | gatcttgtaa  | acttgccagt  |
| 18121 | agatgctatc  | ggtcttgact  | ttgtcgaagg | taagaagtcg  | cttgaacttg  | tcaaaggtgg  |
| 18181 | attcccagct  | gataagactc  | tctatgcagg | tattgtcaat  | ggtaaaaaaca | tctggcgcaa  |
| 18241 | caactacgaa  | aagagtttgg  | ctgttcttga | acaaattcca  | gctgaaaaaa  | tcgtattgac  |
| 18301 | aagctcatgc  | tcacttcttc  | atgtgccatt | tacgactgct  | aatgaagaat  | ttgaaccagc  |
| 18361 | aatcttgaac  | cactttgctt  | ttgccgttga | aaaattagat  | gaacttcgtg  | atltggatgc  |
| 18421 | tatccgtaat  | ggtcaagggtg | ctgaatcact | tgctgctaac  | aaagagctct  | ttgctattga  |
| 18481 | acgtgttgg   | gcaaatgctg  | aacttcgtgc | tcgtattgca  | ggtttgacag  | aagcagatta  |
| 18541 | cacacgttta  | cgggctttcg  | cagaacgtga | agccattcaa  | aaggatgcct  | tcaaacttcc  |
| 18601 | attgcttccg  | acaacaacta  | tcggttcatt | tcctcaaact  | aaggaagttc  | gtgccaaacg  |
| 18661 | tttggttttc  | cgtaagaatg  | aattgtctca | ggaagaatat  | gatgcctttc  | ttgctgaaat  |
| 18721 | tatagatgaa  | tggattaaat  | ggcaagaaga | agttggcttt  | gacgtccttg  | tacatggtga  |
| 18781 | gtttgaacgt  | aatgacatgg  | ttgagtactt | cgggtcaaaac | ttgtctgggt  | acctcttctc  |
| 18841 | taaaaatgg   | tgggtgcaat  | catatggtat | gcgtggggta  | aaaccacca   | tcactctggg  |
| 18901 | tgatgtcact  | cgtcttaatc  | caatcactgt | aaaatggtct  | agctacgcac  | aaagccgtac  |
| 18961 | tgacaagcct  | gttaaaggta  | tgttgactgg | gccagttaca  | atcctcaatt  | ggtcattccc  |
| 19021 | acgtgaagat  | atctctatta  | aagattcaac | tcttcaaact  | gctcttgcta  | tcaaggatga  |
| 19081 | agtgttgac   | ctcgaagctg  | caggcattaa | aattatccaa  | atcgatgagg  | ctgctcttcg  |
| 19141 | tgaaaaaattg | ccactccgtc  | gtagtactg  | gtacgaagac  | taccttgact  | gggcatattcc |
| 19201 | agccttccgt  | ttggtacact  | caacgtagct | accagacaca  | caaattccaca | cacatattgt  |
| 19261 | ttactcagaa  | tttacagata  | tcattccagc | tatcgacaac  | ttggatgcag  | atgttatctc  |
| 19321 | ttttgaagct  | agtcgttcaa  | accttgaaat | tttggatgaa  | cttaaagcac  | aaaacttcca  |
| 19381 | aacagaagtt  | ggacctggag  | tttatgat   | ccactcacct  | cgtgtcccac  | aagacggtga  |
| 19441 | aattgaccac  | actatcgaag  | cgatcttggc | taaagttcca  | agtagtaaa   | tatggatcaa  |
| 19501 | ccctgactgt  | ggtttgaaga  | ctcgtggtat | taaagaaact  | aaagaaagct  | taaccaagct  |
| 19561 | tctagaagca  | gcaaaagcgg  | ctcgcaaaaa | cttgtaagta  | gaagttataa  | taccttgaaa  |
| 19621 | agcttctttc  | ctatatgtag  | aaggttttca | atagtgata   | atcttctaaa  | gatttttgta  |
| 19681 | atcaagctag  | atgcaaaatg  | tgatcaataa | ttcctacgag  | tttacttgac  | actaataaaa  |
| 19741 | atgcttttgt  | ctcaacaaaa  | atctaaaacg | agaaggttaa  | aacttatgac  | aagccaaaca  |
| 19801 | ccatccctct  | cttttgaagt  | ctttccacct | aatccagccg  | taggcaataa  | gaaaatcttg  |
| 19861 | cttgcccttg  | atgacatgaa  | aggatcggca | ccccatttta  | tcagtgtaac  | agctagtaat  |
| 19921 | aacaaatata  | atatcaaaga  | gacaacggtt | cctttggcag  | accatattca  | aatgacctg   |
| 19981 | gctattccta  | ctattgctca  | ccttccagca | atctatttga  | gcaaagaaaa  | ggtagctgat  |
| 20041 | actttgagag  | aattagatgc  | tgttggagta | aatcgatatcc | tggcacttcg  | tggcgacatc  |
| 20101 | attcctgggg  | tcgaaccttt  | aaaagacttc | agatatgcaa  | ctgatttgat  | tgagtttatc  |



|       |             |             |            |             |             |             |
|-------|-------------|-------------|------------|-------------|-------------|-------------|
| 20161 | aaggcagaag  | ctcctaactt  | tgatatcatt | ggtgcttggt  | atcctgaagg  | tcatcctgat  |
| 20221 | tcaccaaadc  | aaatctctga  | tattcaaaat | cttaagaaga  | aagtagatgc  | aggttggtca  |
| 20281 | agtcttgtaa  | cccaactctt  | ctttgataat | gaacgcttct  | acgatttcca  | agataaatgt  |
| 20341 | actcttgctg  | gcattaatgt  | gcctatctat | gctggtatta  | tgcctatctt  | gaatcgtaac  |
| 20401 | caagccctac  | gtttacttaa  | gacgtgtgaa | aatatccatt  | tgccacgtaa  | attccgtgct  |
| 20461 | atcttggtata | agtatgagca  | tgattctgaa | tctctgagag  | ctgccgggtct | agcttatgct  |
| 20521 | gttgacccaa  | tcgtggattt  | ggttacgcaa | gacgttgctg  | gagttcacct  | ttatacgatg  |
| 20581 | aataatgcag  | agactgcacg  | tcatatctac | gaagctactc  | actccttggt  | taagcatcat  |
| 20641 | tcacaagtcg  | gcgcactgta  | attgaataat | agaaaaacca  | cctatatatt  | taatctatag  |
| 20701 | gtgggtttctt | ggtgtagcag  | cgaaagattg | taattactta  | tatggggcat  | tattatcatg  |
| 20761 | tatcaaaaaa  | gacctagagc  | ttagctctaa | gtcaaaaagta | ttattcacct  | acaaaagcat  |
| 20821 | tgattttctgc | ttcgatgtta  | gcaatctttt | tcttttagcat | ccgcttcagt  | ttctccaact  |
| 20881 | gttgcaatgt  | aaaatttgat  | ttttggttct | gtacctgaag  | gacgaacggc  | aaacctgaa   |
| 20941 | tcatcagcca  | agatgtatct  | caaacgttta | cttgaggagg  | ttgtcaattt  | ttctacgccg  |
| 21001 | tcagcagtag  | tagctgtttg  | ttccaagaag | tcttctgttt  | tagcaatata  | agtgttggtg  |
| 21061 | aattgttttag | gagcattgag  | acggaatttg | tccatgattt  | tcttgatttc  | tgagcacca   |
| 21121 | tcaaacacctg | aaagcgtaac  | tgaaattgtc | ttttctgaga  | agtaaccata  | ttgtttgtag  |
| 21181 | atttcttcga  | taccatctgc  | caatgtcata | ccacgtgaac  | ggtagtatgc  | agcaatttct  |
| 21241 | gcaacgataa  | gaacggcttg  | gatagcgtct | ttatcgcgta  | caaattggtt  | gatgaggtaa  |
| 21301 | ccgaagcttt  | cttcaaaacc  | aaacatgtaa | gtgtaattgt  | gttggtgttc  | aaattcatga  |
| 21361 | atctttttcac | cgataaatct  | gaagccagtc | aagacattaa  | acattgttgc  | gccgtagctt  |
| 21421 | tctgcaatct  | tagtaactaa  | ttcagttgat | acgattgatt  | tacaaagggc  | agcattagca  |
| 21481 | gggagagtac  | cagctgtttt  | gtgagcttca | aggatatatt  | tggcgatgat  | agcaccaatt  |
| 21541 | tgggttaccag | aaagggttgag | gtatgaacca | tctggttggc  | ggatttcaac  | gccaaagacgg |
| 21601 | tccgcgtcag  | ggtcagttgc  | aaccaatacg | tcggcatcta  | catt        |             |

//

**Kan10**

LOCUS 10K

DEFINITION

FEATURES

gene

Location/Qualifiers

153..980

/rbs\_motif="None"

/uscore="3.51"

/rscore="-3.27"

/sscore="-3.23"

/conf="100.0"

/cscore="135.48"

/partial=0

/tscore="-3.48"

/rbs\_spacer="None"

/gc\_cont="0.407"

/start\_type="GTG"

/score=132.3

/locus\_tag="10K\_01"

CDS

153..980

/rbs\_motif="None"

/uscore="3.51"

/rscore="-3.27"

/sscore="-3.23"

/conf="100.0"

/cscore="135.48"

/partial=0

/tscore="-3.48"

/product="4-alpha-glucanotransferase"

/rbs\_spacer="None"

/gc\_cont="0.407"

/start\_type="GTG"

/score=132.3

/codon\_start=1

/locus\_tag="10K\_01"

gene

1060..3246

/rbs\_motif="None"

/uscore="8.28"

/rscore="-3.27"

/sscore="1.37"

/conf="99.99"

/cscore="285.85"

/partial=0

/tscore="-3.65"

/rbs\_spacer="None"

/gc\_cont="0.379"

/start\_type="TTG"

/score=287.2

/locus\_tag="10K\_02"

CDS

1060..3246

/rbs\_motif="None"

/uscore="8.28"

/rscore="-3.27"

/sscore="1.37"

/conf="99.99"

/cscore="285.85"

/partial=0

/tscore="-3.65"

/product="maltodextrin phosphorylase"

/rbs\_spacer="None"

/gc\_cont="0.379"

/start\_type="TTG"

|      |                                                                                                                                                                                                                                                                                                                          |
|------|--------------------------------------------------------------------------------------------------------------------------------------------------------------------------------------------------------------------------------------------------------------------------------------------------------------------------|
|      | /score=287.2<br>/codon_start=1<br>/locus_tag="10K_02"<br>gene complement(3352..3792)<br>/rbs_motif="None"<br>/uscore="1.42"<br>/rscore="-3.27"<br>/sscore="1.22"<br>/conf="100.0"<br>/cscore="44.7"<br>/partial=0<br>/tscore="3.07"<br>/rbs_spacer="None"<br>/gc_cont="0.306"<br>/start_type="ATG"<br>/score=45.9        |
| CDS  | /locus_tag="10K_03"<br>complement(3352..3792)<br>/rbs_motif="None"<br>/uscore="1.42"<br>/rscore="-3.27"<br>/sscore="1.22"<br>/conf="100.0"<br>/cscore="44.7"<br>/partial=0<br>/tscore="3.07"<br>/product="hypothetical protein X841_05855"<br>/rbs_spacer="None"<br>/gc_cont="0.306"<br>/start_type="ATG"<br>/score=45.9 |
| gene | /codon_start=1<br>/locus_tag="10K_03"<br>complement(3734..4402)<br>/rbs_motif="None"<br>/uscore="6.14"<br>/rscore="-3.27"<br>/sscore="5.28"<br>/conf="100.0"<br>/cscore="64.59"<br>/partial=0<br>/tscore="3.07"<br>/rbs_spacer="None"<br>/gc_cont="0.332"<br>/start_type="ATG"<br>/score=69.9                            |
| CDS  | /locus_tag="10K_04"<br>complement(3734..4402)<br>/rbs_motif="None"<br>/uscore="6.14"<br>/rscore="-3.27"<br>/sscore="5.28"<br>/conf="100.0"<br>/cscore="64.59"<br>/partial=0<br>/tscore="3.07"<br>/product="hypothetical protein"<br>/rbs_spacer="None"<br>/gc_cont="0.332"<br>/start_type="ATG"<br>/score=69.9           |

|      |                                                                                                                                                                                                                                                                                                                                                      |
|------|------------------------------------------------------------------------------------------------------------------------------------------------------------------------------------------------------------------------------------------------------------------------------------------------------------------------------------------------------|
| gene | /codon_start=1<br>/locus_tag="10K_04"<br>4585..5574<br>/rbs_motif="AGGAG"<br>/uscore="3.46"<br>/rscore="11.88"<br>/sscore="18.4"<br>/conf="99.99"<br>/cscore="178.52"<br>/partial=0<br>/tscore="3.07"<br>/rbs_spacer="5-10bp"<br>/gc_cont="0.384"<br>/start_type="ATG"<br>/score=196.9                                                               |
| CDS  | /locus_tag="10K_05"<br>4585..5574<br>/rbs_motif="AGGAG"<br>/uscore="3.46"<br>/rscore="11.88"<br>/sscore="18.4"<br>/conf="99.99"<br>/cscore="178.52"<br>/partial=0<br>/tscore="3.07"<br>/product="lipoate-protein ligase A"<br>/rbs_spacer="5-10bp"<br>/gc_cont="0.384"<br>/start_type="ATG"<br>/score=196.9                                          |
| gene | /codon_start=1<br>/locus_tag="10K_05"<br>complement(5571..5693)<br>/rbs_motif="AGGA/GGAG/GAGG"<br>/uscore="0.29"<br>/rscore="2.01"<br>/sscore="3.12"<br>/conf="67.3"<br>/cscore="0.02"<br>/partial=0<br>/tscore="1.47"<br>/rbs_spacer="11-12bp"<br>/gc_cont="0.301"<br>/start_type="ATG"<br>/score=3.1                                               |
| CDS  | /locus_tag="10K_06"<br>complement(5571..5693)<br>/rbs_motif="AGGA/GGAG/GAGG"<br>/uscore="0.29"<br>/rscore="2.01"<br>/sscore="3.12"<br>/conf="67.3"<br>/cscore="0.02"<br>/partial=0<br>/tscore="1.47"<br>/product="hypothetical protein V528_04795"<br>/rbs_spacer="11-12bp"<br>/gc_cont="0.301"<br>/start_type="ATG"<br>/score=3.1<br>/codon_start=1 |

|      |                                                                                                                                                                                                                                                                                                                                                           |
|------|-----------------------------------------------------------------------------------------------------------------------------------------------------------------------------------------------------------------------------------------------------------------------------------------------------------------------------------------------------------|
| gene | /locus_tag="10K_06"<br>5808..6872<br>/rbs_motif="None"<br>/uscore="4.17"<br>/rscore="-3.27"<br>/sscore="-1.65"<br>/conf="100.0"<br>/cscore="77.3"<br>/partial=0<br>/tscore="-3.65"<br>/rbs_spacer="None"<br>/gc_cont="0.385"<br>/start_type="TTG"<br>/score=75.7                                                                                          |
| CDS  | /locus_tag="10K_07"<br>5808..6872<br>/rbs_motif="None"<br>/uscore="4.17"<br>/rscore="-3.27"<br>/sscore="-1.65"<br>/conf="100.0"<br>/cscore="77.3"<br>/partial=0<br>/tscore="-3.65"<br>/product="site-specific tyrosine recombinase XerS"<br>/rbs_spacer="None"<br>/gc_cont="0.385"<br>/start_type="TTG"<br>/score=75.7                                    |
| gene | /codon_start=1<br>/locus_tag="10K_07"<br>complement(7041..9581)<br>/rbs_motif="AGGAG"<br>/uscore="1.01"<br>/rscore="11.88"<br>/sscore="15.95"<br>/conf="99.99"<br>/cscore="460.66"<br>/partial=0<br>/tscore="3.07"<br>/rbs_spacer="5-10bp"<br>/gc_cont="0.404"<br>/start_type="ATG"<br>/score=476.6                                                       |
| CDS  | /locus_tag="10K_08"<br>complement(7041..9581)<br>/rbs_motif="AGGAG"<br>/uscore="1.01"<br>/rscore="11.88"<br>/sscore="15.95"<br>/conf="99.99"<br>/cscore="460.66"<br>/partial=0<br>/tscore="3.07"<br>/product="aminopeptidase N"<br>/rbs_spacer="5-10bp"<br>/gc_cont="0.404"<br>/start_type="ATG"<br>/score=476.6<br>/codon_start=1<br>/locus_tag="10K_08" |

|      |                                                                                                                                                                                                                                                                                                                                                                  |
|------|------------------------------------------------------------------------------------------------------------------------------------------------------------------------------------------------------------------------------------------------------------------------------------------------------------------------------------------------------------------|
| gene | complement(9715..10371)<br>/rbs_motif="AGGA/GGAG/GAGG"<br>/uscore="0.06"<br>/rscore="4.18"<br>/sscore="8.31"<br>/conf="100.0"<br>/cscore="130.3"<br>/partial=0<br>/tscore="3.07"<br>/rbs_spacer="11-12bp"<br>/gc_cont="0.411"<br>/start_type="ATG"<br>/score=138.6<br>/locus_tag="10K_09"                                                                        |
| CDS  | complement(9715..10371)<br>/rbs_motif="AGGA/GGAG/GAGG"<br>/uscore="0.06"<br>/rscore="4.18"<br>/sscore="8.31"<br>/conf="100.0"<br>/cscore="130.3"<br>/partial=0<br>/tscore="3.07"<br>/product="PhoU family transcriptional regulator"<br>/rbs_spacer="11-12bp"<br>/gc_cont="0.411"<br>/start_type="ATG"<br>/score=138.6<br>/codon_start=1<br>/locus_tag="10K_09"  |
| gene | complement(10396..11154)<br>/rbs_motif="AGGAG"<br>/uscore="0.37"<br>/rscore="11.88"<br>/sscore="16.45"<br>/conf="100.0"<br>/cscore="111.64"<br>/partial=0<br>/tscore="3.07"<br>/rbs_spacer="5-10bp"<br>/gc_cont="0.41"<br>/start_type="ATG"<br>/score=128.1<br>/locus_tag="10K_10"                                                                               |
| CDS  | complement(10396..11154)<br>/rbs_motif="AGGAG"<br>/uscore="0.37"<br>/rscore="11.88"<br>/sscore="16.45"<br>/conf="100.0"<br>/cscore="111.64"<br>/partial=0<br>/tscore="3.07"<br>/product="phosphate ABC transporter ATP-binding protein"<br>/rbs_spacer="5-10bp"<br>/gc_cont="0.41"<br>/start_type="ATG"<br>/score=128.1<br>/codon_start=1<br>/locus_tag="10K_10" |
| gene | complement(11167..11970)                                                                                                                                                                                                                                                                                                                                         |

```

/rbs_motif="AGGAG"
/uscore="-2.14"
/rscore="11.88"
/sscore="13.97"
/conf="100.0"
/cscore="132.6"
/partial=0
/tscore="3.07"
/rbs_spacer="5-10bp"
/gc_cont="0.398"
/start_type="ATG"
/score=146.6
/locus_tag="10K_11"
CDS complement(11167..11970)
/rbs_motif="AGGAG"
/uscore="-2.14"
/rscore="11.88"
/sscore="13.97"
/conf="100.0"
/cscore="132.6"
/partial=0
/tscore="3.07"
/product="phosphate ABC transporter ATP-binding protein"
/rbs_spacer="5-10bp"
/gc_cont="0.398"
/start_type="ATG"
/score=146.6
/codon_start=1
gene /locus_tag="10K_11"
complement(11981..12865)
/rbs_motif="GGA/GAG/AGG"
/uscore="3.77"
/rscore="0.91"
/sscore="8.97"
/conf="100.0"
/cscore="105.97"
/partial=0
/tscore="3.07"
/rbs_spacer="5-10bp"
/gc_cont="0.423"
/start_type="ATG"
/score=114.9
CDS /locus_tag="10K_12"
complement(11981..12865)
/rbs_motif="GGA/GAG/AGG"
/uscore="3.77"
/rscore="0.91"
/sscore="8.97"
/conf="100.0"
/cscore="105.97"
/partial=0
/tscore="3.07"
/product="phosphate ABC transporter permease"
/rbs_spacer="5-10bp"
/gc_cont="0.423"
/start_type="ATG"
/score=114.9
/codon_start=1
gene /locus_tag="10K_12"
complement(12855..13769)
/rbs_motif="AGGAG"

```

```

/uscure="4.24"
/rscure="11.88"
/sscore="20.43"
/conf="100.0"
/cscore="123.14"
/partial=0
/tscore="3.07"
/rbs_spacer="5-10bp"
/gc_cont="0.414"
/start_type="ATG"
/score=143.6
/locus_tag="10K_13"
CDS complement(12855..13769)
/rbs_motif="AGGAG"
/uscure="4.24"
/rscure="11.88"
/sscore="20.43"
/conf="100.0"
/cscore="123.14"
/partial=0
/tscore="3.07"
/product="phosphate ABC transporter permease"
/rbs_spacer="5-10bp"
/gc_cont="0.414"
/start_type="ATG"
/score=143.6
/codon_start=1
gene /locus_tag="10K_13"
complement(13772..14647)
/rbs_motif="GGAGG"
/uscure="0.1"
/rscure="14.48"
/sscore="17.65"
/conf="100.0"
/cscore="133.23"
/partial=0
/tscore="3.07"
/rbs_spacer="5-10bp"
/gc_cont="0.404"
/start_type="ATG"
/score=150.9
CDS /locus_tag="10K_14"
complement(13772..14647)
/rbs_motif="GGAGG"
/uscure="0.1"
/rscure="14.48"
/sscore="17.65"
/conf="100.0"
/cscore="133.23"
/partial=0
/tscore="3.07"
/product="phosphate-binding protein"
/rbs_spacer="5-10bp"
/gc_cont="0.404"
/start_type="ATG"
/score=150.9
/codon_start=1
gene /locus_tag="10K_14"
complement(14772..16082)
/rbs_motif="GGA/GAG/AGG"
/uscure="0.1"

```



|      |                                                                                                                                                                                                                                                                                                                                                  |
|------|--------------------------------------------------------------------------------------------------------------------------------------------------------------------------------------------------------------------------------------------------------------------------------------------------------------------------------------------------|
|      | /rscore="0.91"<br>/sscore="4.08"<br>/conf="100.0"<br>/cscore="171.68"<br>/partial=0<br>/tscore="3.07"<br>/rbs_spacer="5-10bp"<br>/gc_cont="0.41"<br>/start_type="ATG"<br>/score=175.8<br>/locus_tag="10K_15"                                                                                                                                     |
| CDS  | complement(14772..16082)<br>/rbs_motif="GGA/GAG/AGG"<br>/uscore="0.1"<br>/rscore="0.91"<br>/sscore="4.08"<br>/conf="100.0"<br>/cscore="171.68"<br>/partial=0<br>/tscore="3.07"<br>/product="23S rRNA methyltransferase"<br>/rbs_spacer="5-10bp"<br>/gc_cont="0.41"<br>/start_type="ATG"<br>/score=175.8<br>/codon_start=1<br>/locus_tag="10K_15" |
| gene | complement(16165..16932)<br>/rbs_motif="AGGA"<br>/uscore="0.77"<br>/rscore="7.92"<br>/sscore="6.26"<br>/conf="100.0"<br>/cscore="90.42"<br>/partial=0<br>/tscore="-3.65"<br>/rbs_spacer="5-10bp"<br>/gc_cont="0.37"<br>/start_type="TTG"<br>/score=96.7<br>/locus_tag="10K_16"                                                                   |
| CDS  | complement(16165..16932)<br>/rbs_motif="AGGA"<br>/uscore="0.77"<br>/rscore="7.92"<br>/sscore="6.26"<br>/conf="100.0"<br>/cscore="90.42"<br>/partial=0<br>/tscore="-3.65"<br>/product="inositol monophosphatase"<br>/rbs_spacer="5-10bp"<br>/gc_cont="0.37"<br>/start_type="TTG"<br>/score=96.7<br>/codon_start=1<br>/locus_tag="10K_16"          |
| gene | complement(16922..17203)<br>/rbs_motif="GGA/GAG/AGG"<br>/uscore="-0.28"<br>/rscore="0.91"                                                                                                                                                                                                                                                        |

|      |                                                                                                                                                                                                                                                                                                                                                               |
|------|---------------------------------------------------------------------------------------------------------------------------------------------------------------------------------------------------------------------------------------------------------------------------------------------------------------------------------------------------------------|
|      | /sscore="4.95"<br>/conf="99.99"<br>/cscore="37.35"<br>/partial=0<br>/tscore="3.07"<br>/rbs_spacer="5-10bp"<br>/gc_cont="0.404"<br>/start_type="ATG"<br>/score=42.3<br>/locus_tag="10K_17"                                                                                                                                                                     |
| CDS  | complement(16922..17203)<br>/rbs_motif="GGA/GAG/AGG"<br>/uscore="-0.28"<br>/rscore="0.91"<br>/sscore="4.95"<br>/conf="99.99"<br>/cscore="37.35"<br>/partial=0<br>/tscore="3.07"<br>/product="hypothetical protein"<br>/rbs_spacer="5-10bp"<br>/gc_cont="0.404"<br>/start_type="ATG"<br>/score=42.3<br>/codon_start=1<br>/locus_tag="10K_17"                   |
| gene | complement(17196..17609)<br>/rbs_motif="GGA/GAG/AGG"<br>/uscore="-5.09"<br>/rscore="0.91"<br>/sscore="-7.82"<br>/conf="100.0"<br>/cscore="53.7"<br>/partial=0<br>/tscore="-3.65"<br>/rbs_spacer="5-10bp"<br>/gc_cont="0.353"<br>/start_type="TTG"<br>/score=45.9<br>/locus_tag="10K_18"                                                                       |
| CDS  | complement(17196..17609)<br>/rbs_motif="GGA/GAG/AGG"<br>/uscore="-5.09"<br>/rscore="0.91"<br>/sscore="-7.82"<br>/conf="100.0"<br>/cscore="53.7"<br>/partial=0<br>/tscore="-3.65"<br>/product="ArsR family transcriptional regulator"<br>/rbs_spacer="5-10bp"<br>/gc_cont="0.353"<br>/start_type="TTG"<br>/score=45.9<br>/codon_start=1<br>/locus_tag="10K_18" |
| gene | complement(17680..18591)<br>/rbs_motif="None"<br>/uscore="0.72"<br>/rscore="-3.27"<br>/sscore="5.08"                                                                                                                                                                                                                                                          |

|      |                                                                                                                                                                                                                                                                                                                                                       |
|------|-------------------------------------------------------------------------------------------------------------------------------------------------------------------------------------------------------------------------------------------------------------------------------------------------------------------------------------------------------|
|      | /conf="100.0"<br>/cscore="133.22"<br>/partial=0<br>/tscore="3.07"<br>/rbs_spacer="None"<br>/gc_cont="0.404"<br>/start_type="ATG"<br>/score=138.3<br>/locus_tag="10K_19"                                                                                                                                                                               |
| CDS  | complement(17680..18591)<br>/rbs_motif="None"<br>/uscore="0.72"<br>/rscore="-3.27"<br>/sscore="5.08"<br>/conf="100.0"<br>/cscore="133.22"<br>/partial=0<br>/tscore="3.07"<br>/product="riboflavin biosynthesis protein RibF"<br>/rbs_spacer="None"<br>/gc_cont="0.404"<br>/start_type="ATG"<br>/score=138.3<br>/codon_start=1                         |
| gene | /locus_tag="10K_19"<br>complement(18588..19421)<br>/rbs_motif="GGA/GAG/AGG"<br>/uscore="4.44"<br>/rscore="0.91"<br>/sscore="7.76"<br>/conf="100.0"<br>/cscore="123.57"<br>/partial=0<br>/tscore="3.07"<br>/rbs_spacer="5-10bp"<br>/gc_cont="0.421"<br>/start_type="ATG"<br>/score=131.3                                                               |
| CDS  | /locus_tag="10K_20"<br>complement(18588..19421)<br>/rbs_motif="GGA/GAG/AGG"<br>/uscore="4.44"<br>/rscore="0.91"<br>/sscore="7.76"<br>/conf="100.0"<br>/cscore="123.57"<br>/partial=0<br>/tscore="3.07"<br>/product="tRNA pseudouridine synthase B"<br>/rbs_spacer="5-10bp"<br>/gc_cont="0.421"<br>/start_type="ATG"<br>/score=131.3<br>/codon_start=1 |
| gene | /locus_tag="10K_20"<br>complement(19638..19943)<br>/rbs_motif="None"<br>/uscore="-1.81"<br>/rscore="-3.27"<br>/sscore="-9.38"<br>/conf="99.87"                                                                                                                                                                                                        |

|      |                                                                                                                                                                                                                                                                                                    |
|------|----------------------------------------------------------------------------------------------------------------------------------------------------------------------------------------------------------------------------------------------------------------------------------------------------|
|      | <pre> /cscore="38.15" /partial=0 /tscore="-3.65" /rbs_spacer="None" /gc_cont="0.399" /start_type="TTG" /score=28.8 /locus_tag="10K_21" </pre>                                                                                                                                                      |
| CDS  | <pre> complement(19638..19943) /rbs_motif="None" /uscore="-1.81" /rscore="-3.27" /sscore="-9.38" /conf="99.87" /cscore="38.15" /partial=0 /tscore="-3.65" /product="hypothetical protein, partial" /rbs_spacer="None" /gc_cont="0.399" /start_type="TTG" /score=28.8 </pre>                        |
| gene | <pre> /codon_start=1 /locus_tag="10K_21" complement(20600..20884) /rbs_motif="GGAG/GAGG" /uscore="-0.26" /rscore="6.9" /sscore="9.06" /conf="99.99" /cscore="31.03" /partial=0 /tscore="3.07" /rbs_spacer="5-10bp" /gc_cont="0.379" /start_type="ATG" /score=40.1 </pre>                           |
| CDS  | <pre> /locus_tag="10K_22" complement(20600..20884) /rbs_motif="GGAG/GAGG" /uscore="-0.26" /rscore="6.9" /sscore="9.06" /conf="99.99" /cscore="31.03" /partial=0 /tscore="3.07" /product="hypothetical protein, partial" /rbs_spacer="5-10bp" /gc_cont="0.379" /start_type="ATG" /score=40.1 </pre> |
| gene | <pre> /codon_start=1 /locus_tag="10K_22" complement(21150..21770) /rbs_motif="AGGAG" /uscore="-0.93" /rscore="11.88" /sscore="14.01" /conf="100.0" /cscore="109.89" </pre>                                                                                                                         |

```

/partial=0
/tscore="3.07"
/rbs_spacer="5-10bp"
/gc_cont="0.407"
/start_type="ATG"
/score=123.9
/locus_tag="10K_23"
CDS complement(21150..21770)
/rbs_motif="AGGAG"
/uscore="-0.93"
/rscore="11.88"
/sscore="14.01"
/conf="100.0"
/cscore="109.89"
/partial=0
/tscore="3.07"
/product="type I restriction endonuclease subunit S"
/rbs_spacer="5-10bp"
/gc_cont="0.407"
/start_type="ATG"
/score=123.9
/codon_start=1
/locus_tag="10K_23"
gene complement(21893..22387)
/rbs_motif="GGAGG"
/uscore="6.28"
/rscore="14.48"
/sscore="23.83"
/conf="100.0"
/cscore="87.16"
/partial=0
/tscore="3.07"
/rbs_spacer="5-10bp"
/gc_cont="0.378"
/start_type="ATG"
/score=111.0
/locus_tag="10K_24"
CDS complement(21893..22387)
/rbs_motif="GGAGG"
/uscore="6.28"
/rscore="14.48"
/sscore="23.83"
/conf="100.0"
/cscore="87.16"
/partial=0
/tscore="3.07"
/product="lipid hydroperoxide peroxidase"
/rbs_spacer="5-10bp"
/gc_cont="0.378"
/start_type="ATG"
/score=111.0
/codon_start=1
/locus_tag="10K_24"
gene complement(22452..22820)
/rbs_motif="None"
/uscore="0.35"
/rscore="-3.27"
/sscore="-5.77"
/conf="100.0"
/cscore="50.42"
/partial=0

```

|      |                                                                                                                                                                                                                                                                                                                                                                                                                                                                                                                                                                                                                                                                                                                                                                                                                                                                                                                                                                                                                                                                                                                                                                                                                                                                                             |
|------|---------------------------------------------------------------------------------------------------------------------------------------------------------------------------------------------------------------------------------------------------------------------------------------------------------------------------------------------------------------------------------------------------------------------------------------------------------------------------------------------------------------------------------------------------------------------------------------------------------------------------------------------------------------------------------------------------------------------------------------------------------------------------------------------------------------------------------------------------------------------------------------------------------------------------------------------------------------------------------------------------------------------------------------------------------------------------------------------------------------------------------------------------------------------------------------------------------------------------------------------------------------------------------------------|
|      | /tscore="-3.65"<br>/rbs_spacer="None"<br>/gc_cont="0.322"<br>/start_type="TTG"<br>/score=44.6<br>/locus_tag="10K_25"<br>complement(22452..22820)<br>/rbs_motif="None"<br>/uscore="0.35"<br>/rscore="-3.27"<br>/sscore="-5.77"<br>/conf="100.0"<br>/cscore="50.42"<br>/partial=0<br>/tscore="-3.65"<br>/product="hypothetical protein, partial"<br>/rbs_spacer="None"<br>/gc_cont="0.322"<br>/start_type="TTG"<br>/score=44.6<br>/codon_start=1<br>/locus_tag="10K_25"<br>complement(22866..23231)<br>/rbs_motif="GGA/GAG/AGG"<br>/uscore="-0.47"<br>/rscore="0.91"<br>/sscore="-3.2"<br>/conf="96.63"<br>/cscore="17.81"<br>/partial=0<br>/tscore="-3.65"<br>/rbs_spacer="5-10bp"<br>/gc_cont="0.325"<br>/start_type="TTG"<br>/score=14.6<br>/locus_tag="10K_26"<br>complement(22866..23231)<br>/rbs_motif="GGA/GAG/AGG"<br>/uscore="-0.47"<br>/rscore="0.91"<br>/sscore="-3.2"<br>/conf="96.63"<br>/cscore="17.81"<br>/partial=0<br>/tscore="-3.65"<br>/product="haloacid dehalogenase, partial"<br>/rbs_spacer="5-10bp"<br>/gc_cont="0.325"<br>/start_type="TTG"<br>/score=14.6<br>/codon_start=1<br>/locus_tag="10K_26"<br>23361..24617<br>/rbs_motif="AGGA"<br>/uscore="3.29"<br>/rscore="7.92"<br>/sscore="14.27"<br>/conf="100.0"<br>/cscore="100.67"<br>/partial=0<br>/tscore="3.07" |
| CDS  |                                                                                                                                                                                                                                                                                                                                                                                                                                                                                                                                                                                                                                                                                                                                                                                                                                                                                                                                                                                                                                                                                                                                                                                                                                                                                             |
| gene |                                                                                                                                                                                                                                                                                                                                                                                                                                                                                                                                                                                                                                                                                                                                                                                                                                                                                                                                                                                                                                                                                                                                                                                                                                                                                             |
| CDS  |                                                                                                                                                                                                                                                                                                                                                                                                                                                                                                                                                                                                                                                                                                                                                                                                                                                                                                                                                                                                                                                                                                                                                                                                                                                                                             |
| gene |                                                                                                                                                                                                                                                                                                                                                                                                                                                                                                                                                                                                                                                                                                                                                                                                                                                                                                                                                                                                                                                                                                                                                                                                                                                                                             |

|      |                                                                                                                                                                                                                                                                                                                                                                                                                                                                                                                                                                                                                                                                                                                                                                                                                                                                                                                                                                                                                                                                                                                                                                                                                                                                                  |
|------|----------------------------------------------------------------------------------------------------------------------------------------------------------------------------------------------------------------------------------------------------------------------------------------------------------------------------------------------------------------------------------------------------------------------------------------------------------------------------------------------------------------------------------------------------------------------------------------------------------------------------------------------------------------------------------------------------------------------------------------------------------------------------------------------------------------------------------------------------------------------------------------------------------------------------------------------------------------------------------------------------------------------------------------------------------------------------------------------------------------------------------------------------------------------------------------------------------------------------------------------------------------------------------|
|      | /rbs_spacer="5-10bp"<br>/gc_cont="0.396"<br>/start_type="ATG"<br>/score=114.9<br>/locus_tag="10K_27"<br>23361..24617<br>/rbs_motif="AGGA"<br>/uscore="3.29"<br>/rscore="7.92"<br>/sscore="14.27"<br>/conf="100.0"<br>/cscore="100.67"<br>/partial=0<br>/tscore="3.07"<br>/product="transposase"<br>/rbs_spacer="5-10bp"<br>/gc_cont="0.396"<br>/start_type="ATG"<br>/score=114.9<br>/codon_start=1<br>/locus_tag="10K_27"<br>complement(24687..25967)<br>/rbs_motif="GGAGG"<br>/uscore="0.39"<br>/rscore="14.48"<br>/sscore="17.93"<br>/conf="99.99"<br>/cscore="227.32"<br>/partial=0<br>/tscore="3.07"<br>/rbs_spacer="5-10bp"<br>/gc_cont="0.406"<br>/start_type="ATG"<br>/score=245.2<br>/locus_tag="10K_28"<br>complement(24687..25967)<br>/rbs_motif="GGAGG"<br>/uscore="0.39"<br>/rscore="14.48"<br>/sscore="17.93"<br>/conf="99.99"<br>/cscore="227.32"<br>/partial=0<br>/tscore="3.07"<br>/product="O-acetylhomoserine sulfhydrylase"<br>/rbs_spacer="5-10bp"<br>/gc_cont="0.406"<br>/start_type="ATG"<br>/score=245.2<br>/codon_start=1<br>/locus_tag="10K_28"<br>complement(26088..28400)<br>/rbs_motif="GGAG/GAGG"<br>/uscore="3.96"<br>/rscore="6.9"<br>/sscore="13.93"<br>/conf="99.99"<br>/cscore="429.0"<br>/partial=0<br>/tscore="3.07"<br>/rbs_spacer="5-10bp" |
| CDS  |                                                                                                                                                                                                                                                                                                                                                                                                                                                                                                                                                                                                                                                                                                                                                                                                                                                                                                                                                                                                                                                                                                                                                                                                                                                                                  |
| gene |                                                                                                                                                                                                                                                                                                                                                                                                                                                                                                                                                                                                                                                                                                                                                                                                                                                                                                                                                                                                                                                                                                                                                                                                                                                                                  |
| CDS  |                                                                                                                                                                                                                                                                                                                                                                                                                                                                                                                                                                                                                                                                                                                                                                                                                                                                                                                                                                                                                                                                                                                                                                                                                                                                                  |
| gene |                                                                                                                                                                                                                                                                                                                                                                                                                                                                                                                                                                                                                                                                                                                                                                                                                                                                                                                                                                                                                                                                                                                                                                                                                                                                                  |

|      |                                                                                                                                                                                                                                                                                                                                    |
|------|------------------------------------------------------------------------------------------------------------------------------------------------------------------------------------------------------------------------------------------------------------------------------------------------------------------------------------|
|      | /gc_cont="0.425"<br>/start_type="ATG"<br>/score=442.9<br>/locus_tag="10K_29"                                                                                                                                                                                                                                                       |
| CDS  | complement(26088..28400)<br>/rbs_motif="GGAG/GAGG"<br>/uscore="3.96"<br>/rscore="6.9"<br>/sscore="13.93"<br>/conf="99.99"<br>/cscore="429.0"<br>/partial=0<br>/tscore="3.07"<br>/product="ATP-dependent DNA helicase PcrA"<br>/rbs_spacer="5-10bp"<br>/gc_cont="0.425"<br>/start_type="ATG"<br>/score=442.9<br>/codon_start=1      |
| gene | /locus_tag="10K_29"<br>complement(28570..28818)<br>/rbs_motif="None"<br>/uscore="-2.21"<br>/rscore="-3.32"<br>/sscore="-3.17"<br>/conf="52.15"<br>/cscore="3.54"<br>/partial=0<br>/tscore="3.02"<br>/rbs_spacer="None"<br>/gc_cont="0.386"<br>/start_type="ATG"<br>/score=0.4                                                      |
| CDS  | /locus_tag="10K_30"<br>complement(28570..28818)<br>/rbs_motif="None"<br>/uscore="-2.21"<br>/rscore="-3.32"<br>/sscore="-3.17"<br>/conf="52.15"<br>/cscore="3.54"<br>/partial=0<br>/tscore="3.02"<br>/product="hypothetical protein"<br>/rbs_spacer="None"<br>/gc_cont="0.386"<br>/start_type="ATG"<br>/score=0.4<br>/codon_start=1 |
| gene | /locus_tag="10K_30"<br>28916..30259<br>/rbs_motif="AGGAG/GGAGG"<br>/uscore="-0.15"<br>/rscore="7.19"<br>/sscore="10.11"<br>/conf="99.99"<br>/cscore="224.67"<br>/partial=0<br>/tscore="3.07"<br>/rbs_spacer="11-12bp"<br>/gc_cont="0.412"                                                                                          |



|      |                                                                                                                                                                                                                                                                                                                                                                                                                                                                                                                                                                                                         |
|------|---------------------------------------------------------------------------------------------------------------------------------------------------------------------------------------------------------------------------------------------------------------------------------------------------------------------------------------------------------------------------------------------------------------------------------------------------------------------------------------------------------------------------------------------------------------------------------------------------------|
|      | /start_type="ATG"<br>/score=234.8<br>/locus_tag="10K_31"<br>28916..30259<br>/rbs_motif="AGGAG/GGAGG"<br>/uscore="-0.15"<br>/rscore="7.19"<br>/sscore="10.11"<br>/conf="99.99"<br>/cscore="224.67"<br>/partial=0<br>/tscore="3.07"<br>/product="sodium:alanine symporter"<br>/rbs_spacer="11-12bp"<br>/gc_cont="0.412"<br>/start_type="ATG"<br>/score=234.8<br>/codon_start=1                                                                                                                                                                                                                            |
| CDS  |                                                                                                                                                                                                                                                                                                                                                                                                                                                                                                                                                                                                         |
| gene | /locus_tag="10K_31"<br>30388..31758<br>/rbs_motif="AGGA"<br>/uscore="5.45"<br>/rscore="7.92"<br>/sscore="16.43"<br>/conf="99.99"<br>/cscore="265.64"<br>/partial=0<br>/tscore="3.07"<br>/rbs_spacer="5-10bp"<br>/gc_cont="0.416"<br>/start_type="ATG"<br>/score=282.1<br>/locus_tag="10K_32"<br>30388..31758<br>/rbs_motif="AGGA"<br>/uscore="5.45"<br>/rscore="7.92"<br>/sscore="16.43"<br>/conf="99.99"<br>/cscore="265.64"<br>/partial=0<br>/tscore="3.07"<br>/product="tRNA modification GTPase"<br>/rbs_spacer="5-10bp"<br>/gc_cont="0.416"<br>/start_type="ATG"<br>/score=282.1<br>/codon_start=1 |
| CDS  |                                                                                                                                                                                                                                                                                                                                                                                                                                                                                                                                                                                                         |
| gene | /locus_tag="10K_32"<br>31874..32002<br>/rbs_motif="None"<br>/uscore="1.05"<br>/rscore="-6.48"<br>/sscore="-3.88"<br>/conf="65.22"<br>/cscore="6.62"<br>/partial=0<br>/tscore="1.55"<br>/rbs_spacer="None"<br>/gc_cont="0.287"<br>/start_type="ATG"                                                                                                                                                                                                                                                                                                                                                      |

|      |                                                                                                                                                                                                                                                                                                                                                      |
|------|------------------------------------------------------------------------------------------------------------------------------------------------------------------------------------------------------------------------------------------------------------------------------------------------------------------------------------------------------|
|      | /score=2.7<br>/locus_tag="10K_33"<br>31874..32002<br>/rbs_motif="None"<br>/uscore="1.05"<br>/rscore="-6.48"<br>/sscore="-3.88"<br>/conf="65.22"<br>/cscore="6.62"<br>/partial=0<br>/tscore="1.55"<br>/product="AraC family transcriptional regulator"<br>/rbs_spacer="None"<br>/gc_cont="0.287"<br>/start_type="ATG"<br>/score=2.7<br>/codon_start=1 |
| CDS  |                                                                                                                                                                                                                                                                                                                                                      |
| gene | /locus_tag="10K_33"<br>32250..32840<br>/rbs_motif="AGGA"<br>/uscore="3.88"<br>/rscore="7.92"<br>/sscore="7.67"<br>/conf="100.0"<br>/cscore="54.35"<br>/partial=0<br>/tscore="-3.48"<br>/rbs_spacer="5-10bp"<br>/gc_cont="0.357"<br>/start_type="GTG"<br>/score=62.0                                                                                  |
| CDS  | /locus_tag="10K_34"<br>32250..32840<br>/rbs_motif="AGGA"<br>/uscore="3.88"<br>/rscore="7.92"<br>/sscore="7.67"<br>/conf="100.0"<br>/cscore="54.35"<br>/partial=0<br>/tscore="-3.48"<br>/product="AraC family transcriptional regulator"<br>/rbs_spacer="5-10bp"<br>/gc_cont="0.357"<br>/start_type="GTG"<br>/score=62.0<br>/codon_start=1            |
| gene | /locus_tag="10K_34"<br>complement(33050..33337)<br>/rbs_motif="None"<br>/uscore="-2.26"<br>/rscore="-3.27"<br>/sscore="-2.46"<br>/conf="99.98"<br>/cscore="39.71"<br>/partial=0<br>/tscore="3.07"<br>/rbs_spacer="None"<br>/gc_cont="0.372"<br>/start_type="ATG"<br>/score=37.3                                                                      |

```

CDS
    /locus_tag="10K_35"
    complement(33050..33337)
    /rbs_motif="None"
    /uscore="-2.26"
    /rscore="-3.27"
    /sscore="-2.46"
    /conf="99.98"
    /cscore="39.71"
    /partial=0
    /tscore="3.07"
    /product="hypothetical protein"
    /rbs_spacer="None"
    /gc_cont="0.372"
    /start_type="ATG"
    /score=37.3
    /codon_start=1
    /locus_tag="10K_35"

```

```

BASE COUNT    10179 a    6638 c    6336 g    10338 t
ORIGIN

```

```

1  tttcagaaaa aacgaaacca gtggtatcta aagtagtaac aacacctaac ggtaaagtct
61  tcttcgttta aacttcaaac gaaattctta aggaaactga aaaagttact gaaactccaa
121 gccaaagtca cgacgttgta aaacgacggc cagtgaattg taatacgact cactataggg
181 cgaattcgag ctcggtaccc ggggatccca ccggagttcc accagataac ttctcaccaa
241 caggacaact ttgggggaat ccaatttatg attgggataa acacaaagca gaaaactatg
301 cttggtgggt cttccgtatt caagaatcat tcaaactttt tgattgcttg cgtatcgacc
361 acttcaaagg tttctctgat ttctgggaaa ttcctgctgg agatgaaact gctgaaaatg
421 gtaaattgggt tccaggacct gggtatgacc tcttcaaagt ggttaaagaa gagttgggtg
481 atcttaagat tattgccgaa gaccttggtg atattgatga taaaacacgt aaacttcttg
541 cagactgtgg ttaccagga atgaagattc ttcactttgg attctatgat accactggta
601 acagcattta tgttccacac gcatacacac aacactcagt ggcttacact ggtacacatg
661 ataataaggt tactaatggt tgggtataata acttgacaca agagcaacgt gattacactg
721 atgcttatat caaccgtcgt caaggtgaac caatcacacg tgcccttctt cgcacactct
781 tcgcaacagt aagtaacaca gctattgcca ctatgcaaga tattcttgat aaaaatgaaa
841 atagccgtaa aaacatccct aacacagttg gaggaaactg gagatggcgt atgcttccag
901 gtgaaatcac cgtcgataag aaagaatttc tgactgatat tacagaaaga tataatcgag
961 gaaatcgagg aaataaataa aatgtctaca ttacaaaatt acgttgaagc gaaaaataaa
1021 aaccttaaat aactttcaaa cgaagaaatc tactaccttt tgttagaatt tgtaaaagaa
1081 gcagctgctt caaaacctaa aaatgatagt aaacgtaaag ttactacat ctcagctgag
1141 ttcttgattg gtaaaactttt gtctaataac ttgattaact tgggtatcta taaagatgtg
1201 aaagctgaat tagctgctgc cggaaaatca atcagtgaat tcgaagatat tgaaccagaa
1261 ccatctcttg gtaacggtgg tttgggacgc ttggctgcat gtttcataga ttctatgtca
1321 aactttggca ttaacggtga aggtgtcggg cttaaatacc actgtggtct tttcaaacaa
1381 gtcttcaaag ataacaaaca atatgctgaa ccagattact ggattgaaga tcaatcatgg
1441 ttggttccaa ctgacatctc ttacgatgtc ccattcaaaa acttcacttt gaaatctcgt
1501 ttggaccgtt tggatgtctt gggttacaag aagaaacta agaactacat taacctcttc
1561 gatatacaat gtttgacta ttggttaatt gaaaaaggaa tcacttttga tcaagatgaa
1621 attcaaaaga acttgacact cttcctttac ccagatgatt caactcgtaa aggtgagctc
1681 ttgcgtatct accaacaata cttcatggtg tcaaacgctg ctcaactttt gattgacgaa
1741 gctatcgaac gtggttctaa cttcacgat cttccagatt acgctttcgt acaaatcaac
1801 gatactcacc catcaatggt tatccctgaa ttgattcgtc ttttgacaga aaacatgga
1861 tttgaatttg atgaagcagt agcaatcgtg agcaaaatgg taggttacac aaaccacact
1921 atcttggctg aagctcttga aaaatggcct cttgactatc ttgaagaagt tgttccacac
1981 cttgttggtt tcatcaagaa attggatgcc atcgttcgtg gcaaattcga tgatccacgt
2041 gttcaaatta ttgacgaaca caaccgtgtt cacatggccc gcatggatat ccacttctct
2101 acaagcgtaa acggtgttgc aaagcttcac acagaaatcc ttaagacatc agagttgaaa
2161 cctttctacg acctttaccc agaacgtttc aacaacaaaa caaacggtat ttcattccgt
2221 cgttggttgg aattcgctaa ccaagaactt gctgattaca taaaagagtt aattggtgat
2281 gattacctta ctgatgccac tcaattggag aaattagctg cttttgcaga tgatcctgca
2341 gtacacaaac gtttgtctca aatcaaatat gataacaaat tagctcttaa acgttatctt
2401 aaatccaata aaggtattga tcttgacgaa aattcaatca tcgatacaca aatcaaacgt
2461 ttccacgaat acaaacgtca acaaatgaac gctttgtatg tcatcacaaa tacttgaaaa

```

|      |             |             |            |             |             |            |
|------|-------------|-------------|------------|-------------|-------------|------------|
| 2521 | tcaaaaaaag  | gaaaccttcc  | aaaacgtaaa | atcacaaatca | tcttttggtg  | taaagcagct |
| 2581 | cctgcctatg  | ttattgctca  | agacatcatt | cacttgatct  | tatcactttc  | tgaactcatt |
| 2641 | aataatgatc  | caaaagtaag  | caaatacctc | aacgtccact  | tggttgagaa  | ctacaacgta |
| 2701 | acagttgctg  | aacaccttat  | cccagcgaca | gatatttcag  | aacaaatctc  | attggcttct |
| 2761 | aaagaagctt  | caggtagacg  | taacatgaaa | ttaatgctta  | atgggtgccct | tacacttggt |
| 2821 | acaatggatg  | gtgccaacgt  | tgagattgct | aaattggtag  | gaccagaaaa  | catcttcata |
| 2881 | ttcggtaaa   | actctgatac  | aatcattgac | ctttataaaa  | aagaagggtta | cgtatcacgt |
| 2941 | gattactacg  | aaaatgatgc  | taacatcaaa | gcagctggtg  | attttatcgt  | aagcgaggac |
| 3001 | cttgtaaaa   | ttggggataa  | agaacgtttg | gaacgtcttt  | acaaagaact  | tatctctaaa |
| 3061 | gactggttca  | tgacattgat  | tgacttggcc | gaatacatcg  | agaagaaaga  | agaagtatac |
| 3121 | gcagcttacg  | aagatcaaga  | tgcatggaac | aagaaagttg  | tttacaacat  | tgctaaagca |
| 3181 | ggattcttct  | catctgaccg  | tacaatcgaa | caatatgaca  | aagatatctg  | gcacacaaaa |
| 3241 | tattagccta  | gttgcataga  | aggaaaacaa | gatcagaaat  | ggtcttggtt  | ttttgcatga |
| 3301 | aaaaacacag  | ccaataggat  | aattaaccgt | gtttacataa  | ataagattat  | gttatttcgc |
| 3361 | atgataatth  | agtatatcat  | taatatatgc | ttctttatth  | gatgaatcgt  | aagtattaga |
| 3421 | cttagagtag  | tttagataat  | ggatttcgct | ttttggtggt  | ctagattcct  | cttctaggta |
| 3481 | agaaatccgta | atagtaatct  | taaaattctc | gctcttacct  | gttaaatcaa  | gactaagttg |
| 3541 | aaaatatgta  | aattcatctg  | agtaaaagac | catcttataa  | aaattatagc  | catctcctct |
| 3601 | aaaatcattth | aagcgaggaa  | atggtgttat | attgtatctt  | tcatcccaaa  | gattaccata |
| 3661 | ttctctaata  | tcgtagtcat  | cgaagaagtc | ctgaattctt  | tcttttagttc | tttctttact |
| 3721 | agcatcatcc  | ttatcaaagg  | taacaaaggg | aagcctccca  | atcccatatt  | gaaatgtctc |
| 3781 | cttcattthc  | atagataata  | taactthtca | ttttttctga  | cttaggattt  | ttcaactgaa |
| 3841 | agttgtattc  | acttacacca  | tcttttacag | ctccagtttg  | atatagggtta | tcgccaggga |
| 3901 | ctatcaaaaa  | gagaaaatct  | cttaggtaca | attcgaagtc  | ggtatctatt  | gttttatcat |
| 3961 | gtaatccagg  | gaaacgctga  | atcatttggt | tgtaattctc  | tgcattagag  | aaccattctt |
| 4021 | tatcaaagcc  | tagaccgact  | tcaaaaactt | tataatcgaa  | attgttttca  | taacgttcag |
| 4081 | aatagttthc  | agtggaagtc  | acctgtctaa | atggtaaagt  | catattggta  | ttatctgtaa |
| 4141 | aagtgatatg  | caaaaaaagc  | cttctcggat | caattccttt  | gtcagtataa  | tggtgtcctc |
| 4201 | tatatgtaga  | gagattatca  | gggaaatcgt | cttttacaaa  | gtgtaaaact  | tcaatctcta |
| 4261 | tatctttgac  | aattttcttt  | tgaggtttta | tcttcttgac  | cttgtaatga  | taagccttgt |
| 4321 | aatagtaatt  | gctcttatca  | tagagataag | gtctaaaagc  | tctattataa  | ccgttaaaaa |
| 4381 | gaagaagacc  | tatacaagcc  | ataagaagaa | gaagcgctag  | tatgattttc  | agtcttttac |
| 4441 | aatacctaca  | aaattacttt  | atcatcccta | actcccatgt  | tttttactat  | tatatcatga |
| 4501 | aaataattgc  | tctcaagcca  | tcttcgtgta | ctttgtcacc  | gttttccatt  | ataatatagg |
| 4561 | taccacatta  | caagaggaga  | tatcatgaaa | tatatcgtaa  | acacatcaaa  | tgatcctgcc |
| 4621 | tataatattg  | ctttggaagc  | ctatgccttt | cgtgaattgg  | tagatgaaga  | tgaattgttc |
| 4681 | attctctgga  | ttaaccgtcc  | agctatcatt | gttggtaaac  | acaaaaatac  | cattcaagag |
| 4741 | attaacaaag  | aatatactga  | tgctcatgat | attaaggctg  | ttcgtcgttt  | atctggtggt |
| 4801 | ggtgctgttt  | atcacgattt  | gaacaacctc | aactatacta  | tcatctcaaa  | caaggcagat |
| 4861 | gaaggcgcat  | ttgactttta  | gacattttct | caaccggtta  | tcgcaacact  | tgctgatttg |
| 4921 | ggcgtaagga  | ctgaattttac | tgcccgtaac | gatcttgaga  | tcgatggtaa  | aaaattttgc |
| 4981 | ggaaatgccc  | aagcctacta  | taaaggctgt | atgatgcacc  | atggttgctt  | actctttgac |
| 5041 | gttgatattg  | ccgttcttgg  | tcaagccctt | aaagtcagca  | aagacaaaat  | tgaatctaaa |
| 5101 | ggcgtaagga  | ctgtacgtgc  | tcgtgtgact | aacattgtag  | acgaattgcc  | agaaaaatgc |
| 5161 | actgtaaatg  | aattctcaga  | taagattctt | gaaaaaatga  | aagaattcta  | ccgagaatgc |
| 5221 | accgaatatg  | tcctttctga  | agacgatttg | gctaagattc  | aagagtctta  | tcgagaacaa |
| 5281 | ttcaatacat  | gggactggac  | atatggccaa | tctccagaat  | acacggtaga  | acgtaatgtc |
| 5341 | cgttaccag   | ctggtaagat  | ttctacctat | gcaaatgttg  | aaaattcaat  | tattaaatct |
| 5401 | gttaagattt  | acggagattt  | ctttggtatt | ggcgatgtat  | ctgatattga  | agaacttttg |
| 5461 | gtcgggtgtac | cttacgagta  | cgaatatgtc | ctggcaaaac  | tcaaaaccat  | tgacacaacg |
| 5521 | ctttattthc  | cacgcatgac  | aactgaggag | gttgcaaaag  | ctatcgtagc  | ttaatcattg |
| 5581 | ttatcattgt  | ttgaaacaat  | ctggtaaact | ccagggtgtt  | tttgtagtgc  | taaattattg |
| 5641 | tagttgatta  | gtaagttttt  | aatagcatag | gacagcaaac  | ctaaaaagcc  | cataagagaa |
| 5701 | gaacacctca  | taacatcttt  | ccgaaaaact | gtaattttct  | tgaaagaaat  | ataaggggtg |
| 5761 | gatatacttc  | tattaaagtaa | tttaagtaat | tatggagaat  | aagattaatg  | aaacgtgaac |
| 5821 | tcttactaga  | aaaaattgaa  | gaatataaat | ctcttatgcc  | ttgggttggt  | ttggagtatt |
| 5881 | atcaatctaa  | actatcggta  | ccgtattctt | tcacgacctt  | atatgaatat  | ctcaaggaat |
| 5941 | ataaacgctt  | ttttaactgg  | ttaattgact | caggatattc  | agatgctgat  | gatattgcct |
| 6001 | caattcatat  | caaaaccttg  | gagaatctaa | ctaaaaaaga  | tatggaatcg  | tttgctcctc |
| 6061 | atctacgtga  | acgtccatct  | ttaaatacct | attcaaaagaa | acaggggtgtc | tctcaaacaa |
| 6121 | ccattaatcg  | tacgctttca  | gctctatcta | gtctctataa  | gtattttaact | gaggaggctg |

|      |             |             |             |             |             |             |
|------|-------------|-------------|-------------|-------------|-------------|-------------|
| 6181 | agggacctga  | tggtgaacca  | tatttctatc  | gtaacgtcat  | gaaaaaaatt  | tcgactaaga  |
| 6241 | aaaagaaaga  | gaccttggtc  | gcacgtgctg  | agaatatcaa  | acaaaaactt  | tttctaggcg  |
| 6301 | atgaaaccat  | gaagttcctt  | gattatgtag  | aaaatgaata  | cgaagtcaaa  | ctctcaaatc  |
| 6361 | gtgcgaaatc  | ttcgttttat  | aagaataaag  | agcgagattt  | agccatcatt  | gccctgctgc  |
| 6421 | tgtcttcagg  | cgttcgactc  | tctgaggctg  | taaatctgga  | ccttaaagat  | atcaatttaa  |
| 6481 | aaatgatggt  | tattgacggt  | actcgaaaag  | gtgggtcaacg | ggactcgggtg | aatatggcaa  |
| 6541 | gttttgcaag  | accctatctt  | gaaaactatc  | ttagcatacg  | taataaacgc  | tataaggctg  |
| 6601 | aaaagcaaga  | tggtgctcta  | tttttaacag  | aatatcgagg  | cgttcccaac  | cgtattgatg  |
| 6661 | cttcaagtat  | cgaaaaaatg  | gttggaagt   | attctcagga  | tttcaagatt  | cgtgtcactc  |
| 6721 | cccacaaact  | acgtcatact  | ttggcaacac  | gtctttatga  | tgctactaag  | tctcaagttt  |
| 6781 | tagttagtca  | tcaacttggt  | catgcttcca  | ctcagggtcac | tgatctttac  | acccatattg  |
| 6841 | taaatgatga  | gcaaaaaaaaa | tgctctagat  | aattttataat | taaccaatca  | aatcatttcc  |
| 6901 | gatttagggt  | gattattttt  | attatacata  | aattttaatta | tgtgatgcta  | attttattta  |
| 6961 | cgattgtag   | cagaactaaa  | attatgtaaa  | tcattgtgaa  | taaaaaacaaa | ctctccttca  |
| 7021 | tggaaagctt  | gtttttttata | ttaataatct  | ttaagagctg  | attcaaccgc  | agctttttct  |
| 7081 | ttttcaatta  | agtctacgcg  | tgcagcaatt  | gttttaattc  | ccatcaaaat  | attacgttcc  |
| 7141 | aaagctttgt  | cacttgtttg  | tggctcgaaa  | aatgcaatat  | attgggtcaag | acgtttctga  |
| 7201 | tttttaagga  | ttcctgctgg  | gatattaaca  | aaactatcaa  | agctcatatc  | gccaccaaga  |
| 7261 | gctgctttaa  | tccattccca  | gttttcttta  | gcccagtccc  | aaacgggtctc | ttgagcaaaa  |
| 7321 | gatttgctga  | ggaagttcat  | ataccagaga  | tacaaatctt  | gcggttttaac | aacgttttta  |
| 7381 | tcttttagct  | gacctagtac  | gtagtcaaga  | ccttcttgat  | ttttaagata  | tgaagtgtct  |
| 7441 | tgggtcaatt  | gacgaacgaa  | gttactgtcg  | tttgttgcca  | cgtatgcatt  | aatatactct  |
| 7501 | tcaacaagag  | acagactggt  | ttcttgtttc  | atlttggttga | tgaggacaag  | gccacggata  |
| 7561 | cttgctggaa  | tgctttctat  | gttttcttta  | tgggcttgga  | aaacattttgc | ggctgcaagg  |
| 7621 | actgttggtt  | gatagtctgc  | ttcaatcaag  | tagctgagag  | ctgtttgacg  | gaccatttca  |
| 7681 | tcttcatcag  | actccccctt  | tttggcatcg  | aaaccaaggc  | gttcaaagtc  | atlttggaat  |
| 7741 | tgacgacgta  | ccaaggcttt  | ataatgcact  | tcggcttctg  | tatcttcatc  | gataaagcgt  |
| 7801 | ttcaaaccag  | caaggatttg  | agatttagct  | tgagaaatca  | agaagctttc  | ttctttttcg  |
| 7861 | acaagatcaa  | gaagaccaac  | taggcttgca  | tacgagatac  | gtccactttc  | cgctagaaga  |
| 7921 | cggcgttctt  | gtaagatttg  | aagtttactt  | acagtatcaa  | ggtttgcaaa  | atcttctaag  |
| 7981 | atattgtcca  | agagttgtcc  | ttgatagtct  | gtgatgtaat  | gtgctgtatt  | agctgtatta  |
| 8041 | agacggagaa  | ctccattatt  | ttcagtagca  | agctggctat  | aatttggaat  | ctcaatacgc  |
| 8101 | tcttctgaaa  | gtgtatctgg  | aagcccattc  | cagtttgtat  | tcaatggaat  | ctcccaaagg  |
| 8161 | cgccctttgt  | cttcatgttc  | accaatgaag  | aattgttttt  | gactaaggat  | aagcgtatca  |
| 8221 | tcaacaactt  | ctgcactaac  | cactgggtat  | cctggttgct  | ctaaccatgt  | gtccatgaag  |
| 8281 | ctagagacat  | ccttacctga  | agcctctgaa  | agagcattcc  | aaagggtcacg | tccaacagta  |
| 8341 | ttgttatatt  | ggtgtttttc  | aaagtaagct  | ttaagccctt  | tggcaaaggc  | ttcatcgcct  |
| 8401 | aaccaacggc  | ggagcatatg  | cataagacgg  | ctacccttgg  | cataaacaat  | agcactatca  |
| 8461 | aagagggtgt  | taatctcgtc  | tggatgactg  | acttccatgt  | ggacagactg  | tacgccgtct  |
| 8521 | gttgctgcac  | gttgaagagc  | attaggtaca  | ccagttgttt  | ggaaatcttc  | aaagatgttc  |
| 8581 | cagcttggtt  | caatagcatt  | cactgaaaca  | tactccatca  | tgttggcgaa  | actttcgtta  |
| 8641 | agccataaat  | catcccacca  | tttcatggta  | acaaggttac  | cgaaccattg  | gtgagccaat  |
| 8701 | tcgtgagcaa  | caacaagggc  | aacttggtga  | cggcttgtag  | ctgagctatt  | ttcatctaca  |
| 8761 | aggaggtaaa  | cttcacgata  | ggtaacaaga  | ccccagtttt  | ccatggcacc  | cgctgaaaag  |
| 8821 | tcaggaagag  | caagggtgta  | tgataatgga  | ataggatact  | tgacttgga   | ttagtcttca  |
| 8881 | tagaattcga  | tgacacgaac  | ggcaaatatca | agagcgaagt  | cgaagctatt  | ttctgtttgt  |
| 8941 | gcaactgtag  | cgaagacacc  | aacttcagtg  | ccgttttttg  | tttttagctgt | tttaccatga  |
| 9001 | agagcaccga  | aaccaaaggc  | gagaagggtat | gtagacatgc  | gagggtgttg  | ctcgaatgtc  |
| 9061 | caaactccag  | tttcttcacg  | caaattggcta | ttgatttctg  | gcatgtttga  | caaggcagta  |
| 9121 | tcgccctctt  | cagcgtcaaa  | tttcaatgaa  | agatcaaaaag | ttgctttttgc | ttctggttca  |
| 9181 | tcaacacaag  | gaaaagcttc  | acgagcgaaa  | tgagattcaa  | actgtgttga  | aataattttcc |
| 9241 | ttctttttcac | cattgtaagt  | gtaatatgat  | ggataaatac  | cagtcataatt | atctgtgatg  |
| 9301 | cggccagaaa  | attctatgaa  | aattgtttaga | accccagttt  | ctggaagtgc  | aatatgaaaa  |
| 9361 | gcctcattgg  | catcatccat  | ttggaagtgc  | aaggattcat  | tatccaagag  | aactgaatta  |
| 9421 | atggtaagggt | cttttttggtg | aagagagatg  | tgattatcaa  | tggcttcacc  | agtaattggca |
| 9481 | acattccctg  | taaagggtctt | ttcagaacga  | ttaatgtcca  | agaaaagatt  | gtaattttca  |
| 9541 | gggatgaaac  | tttcgataaa  | acgagcaaca  | gatgctgtca  | tatgtaaata  | ctcctaattct |
| 9601 | aacttttctg  | atcgaaacag  | actgatattt  | gtttcgatat  | caggtacttt  | aacaaaagaa  |
| 9661 | atgagcctga  | attattcaat  | acaggctcat  | tataacatag  | atltttaaact | ttgcctataa  |
| 9721 | ttcaatgatt  | tttcagact   | tgaggtagac  | aaccatttca  | caaagattac  | gggcataatc  |
| 9781 | accaatacgt  | tctaggtaca  | cgagtacttg  | gatatactct  | ttggcagcaa  | atgctgcac   |

|       |             |             |             |             |            |            |
|-------|-------------|-------------|-------------|-------------|------------|------------|
| 9841  | tggatttttcg | cggacacctt  | ctactgtcat  | agcttggatg  | tcacggaaat | aattatcaat |
| 9901  | aatctcgtct  | gaagctgcga  | tttcataagc  | acgttcttcg  | tcaccattca | agtaaacttc |
| 9961  | gagagcttct  | tcgaccatgt  | ggcggggcgg  | ttttcccatt  | ttcttgattt | cagtttcaat |
| 10021 | atctgtcatt  | ctgctttcac  | ccttaatacg  | gatgggtgct  | ttagcgatgg | ccaccgcatg |
| 10081 | gtcacccata  | cgttcgacgt  | cactagatgc  | ttttaatgca  | gtgattacag | tacgtaaate |
| 10141 | acttgataca  | ggttgctgga  | gcgcaataag  | ttcaagtgat  | tttttctcaa | gtttggtttc |
| 10201 | gtagttattg  | acgatttcgt  | cgttttcgat  | aacttccttg  | gctaattcaa | ggcatgact  |
| 10261 | aataaaggca  | cgcagagatt  | ttttgagctg  | tgcagcaact  | tcagtaccca | tggcataaaa |
| 10321 | ttggttgtga  | agcttttcta  | attcttcttc  | aaaggggtgt  | cgtaacatca | taattgttaa |
| 10381 | tgactccgtc  | ctttcttaac  | ctaacttacc  | ggtaatgtaa  | tcttcgggtt | ctttgtgttg |
| 10441 | tggattaagg  | aacatgtctt  | tagttgatga  | atactcaata  | agttctccat | cgaggaaaaa |
| 10501 | ggctgttcgt  | tgagatatac  | ggcttgccgt  | ttgcatagaa  | cgtgtgacaa | gcaacaatgt |
| 10561 | atattgatct  | ttaaggttat  | agagtgtttc  | ttcaatctta  | ccagcggaaa | tagggcttag |
| 10621 | ggcagatgtt  | ggttcgtcaa  | gaagaatcac  | ctttggtgag  | gtggcaagta | cccgtgcaac |
| 10681 | acaaactcgt  | tgttgttgcc  | cacctgaaag  | accaagtgtc  | gagtcatgaa | gtcggctcct |
| 10741 | aacctcctcc  | cagactgaag  | ctccttttag  | agattcttct  | actgctttgt | caagaaccgc |
| 10801 | cttatctttg  | ataccattga  | tacgaaggcc  | atagactacg  | ttctcatata | tagacatagg |
| 10861 | gaagggattg  | ggttggttga  | agaccatacc  | aatttcctta  | cggagttcaa | cagtatctgt |
| 10921 | tcgaggactg  | tagacattat  | ggccattgta  | ggaaactgca  | ccagtaactg | tgcattcagg |
| 10981 | gtttaagtcc  | cccattctgt  | tgatagaacg  | aagcaagggt  | gatttttctg | atccagatgg |
| 11041 | cccagataagg | gctgtgattt  | catttgata   | gaaatccata  | gtcacattat | taatggcttt |
| 11101 | tttcttattg  | aaatacaccg  | ataaatcatt  | gattgaaatg  | attggttcag | tcataagtgc |
| 11161 | tcctttctat  | ccaaagcgtc  | ctgatacata  | gtcactgggt  | gactgtagag | cagcatcttg |
| 11221 | gaagattttc  | ttggtttcat  | catattcgat  | aagatcacca  | aggtagaaaa | atgctgtata |
| 11281 | atcactggca  | cgagccgctt  | gttgcatatt  | gtgtgtgacg  | ataataatgg | aataatcttc |
| 11341 | tttcagctca  | aacatggttt  | cttctagctg  | catagtagct  | acaggatcta | atgaagctgc |
| 11401 | tggctcatcc  | ataagaagaa  | tctgtggttt  | aacggcgata  | gcccttgcca | tacaaagacg |
| 11461 | ttgttgctga  | ccaccagaga  | gtgtaaaagc  | tgacttatga  | aggtcatctt | ttacttgttc |
| 11521 | ccaaagtccc  | gcttgtttaa  | gtgatgtttc  | aacaatctca  | tccaaagtgt | gcttatcttt |
| 11581 | cacaccatta  | cattcatggg  | caaaggatgt  | gtttttatag  | atagacttgg | caaatggggt |
| 11641 | tggacgttga  | aagaccattc  | caatgtgttt  | gcgcatttca  | taaacattga | tattacttgc |
| 11701 | attgacatca  | actccttcat  | aaaggatttg  | tccagtaacc  | ttggcaacat | caatagtatc |
| 11761 | attcatgcgg  | tttaggctac  | gaagaaaggt  | tgattttcca  | catcctgagg | gaccgatgag |
| 11821 | tgcagtgatt  | ttattttttt  | cgaattgcat  | atcaatacca  | ttgatggctt | ctttttgacc |
| 11881 | atagtagaca  | tgcaaatcct  | tggtttcaag  | agcgagcttc  | ttctctggga | aggtgataat |
| 11941 | atgacgctcg  | tcccaattgt  | attttgtcat  | gaaatctcct  | ttaagcggat | gttaatttct |
| 12001 | tatggaggta  | agctcctaaa  | cgacgtgcac  | caaagttgaa  | aatcaagatg | aaaatcataa |
| 12061 | gcactgctgc  | tgaaccagca  | gacactgcag  | tggcgtcagg  | tgctgtacct | tctgagttga |
| 12121 | ccttccagat  | gtgaacagca  | agtgtctcag  | cttgacggaa  | aattgatatt | ggactagata |
| 12181 | tgctaagcgg  | attccagttg  | ctccagttaa  | gcgctggtgc  | agattgtcct | gctgtgtaaa |
| 12241 | taagtgtctg  | tgcttcccca  | aaaatacgtc  | cagaggaaaag | tactattcca | gtcacaatac |
| 12301 | caggcaaagc  | ttcaggaatg  | acaacgtgac  | atatagtttc  | ccatctagac | aagcccaagg |
| 12361 | caagtccagc  | ttcgcgttga  | gtgtggtgaa  | ctgtgcgtaa  | actatcttca | atggtacgag |
| 12421 | tcatttgagg  | caagttaaag  | acagtcaatg  | ccaaggcacc  | tgaaaggatt | gaaaatccgt |
| 12481 | actggaattg  | tacaacaaaa  | attaaataag  | caaagagtcc  | gaccaccact | gaaggcatgt |
| 12541 | atgaaaggat  | ttcaatacac  | gtacggacaa  | agttgctgag  | ccggcctttt | ttggcatatt |
| 12601 | ctgataggaa  | gataccagct  | cccattgaaa  | gaggaacaga  | aataattaaa | gtaataacca |
| 12661 | acaaaaataa  | tgaattgtat  | agttgaactc  | caattcctcc  | tccagctttg | tgagatgatg |
| 12721 | acatactagt  | caggaatgac  | caactgatgt  | gtggaatccc  | gcgaaccaag | atatagagaa |
| 12781 | tcaaggctgc  | taggattgtt  | acaataatgc  | cagcaatcac  | atagagcgtg | ctgatagcaa |
| 12841 | ttttatcgac  | tttttttagcg | ttcataattt  | ctctttctct  | cacgagtgat | aaatttcacc |
| 12901 | aacatattga  | aaccaagact  | catcaataag  | agcaccaagg  | caagtgacca | aaggacatta |
| 12961 | tttgaaacag  | ttcccatgac  | tgtattttccg | attcccatag  | tcaatacaga | ggtcaacgtt |
| 13021 | gctgctggtg  | tcgttaaaga  | cgtaggaata  | actacggaat  | ttccaacaac | catctgaacg |
| 13081 | gcaagagcct  | caccaaaggc  | acgggccata  | ccaaagataa  | cggcagtgaa | aatacccggg |
| 13141 | ttagccgcat  | taagtgtcac  | acgccaaatt  | gtttgccagc  | gagtagctcc | catggcaaga |
| 13201 | ctagcttcac  | gataatgacg  | tggcactgca  | cgaagtgcac  | ctgttgtcat | aaaggttacg |
| 13261 | gttggtagaa  | tcattgacgaa | taagacaaaag | gtacctgaaa  | ggataccaaa | acctgttcca |
| 13321 | ccaaaaatga  | agcgaacaaa  | tggaaaccacg | acttgcagac  | caatgaatcc | gtaaacaaca |
| 13381 | gatggaattc  | ctactaagag  | ttcaatagcg  | ggttgtagga  | atthagctcc | cttaggagaa |
| 13441 | atctcagtc   | taaagatagc  | agcaccaatg  | gcaaatggcg  | ttgcaatcaa | ggctgaaagt |

|       |             |            |             |             |             |            |
|-------|-------------|------------|-------------|-------------|-------------|------------|
| 13501 | aaggtaacca  | aaaatgaccc | tataatcatt  | ggcagagccc  | cgaatttgcc  | ttcagacggt |
| 13561 | gaccaatcgc  | cactaaagag | aaactcgact  | aagctgactt  | tattaacaaa  | gaaagtcgcc |
| 13621 | aagccttttt  | gagcaacgaa | aagtaaaatc  | aatgctacga  | tgaaaacaat  | caaggccaag |
| 13681 | caaaggaaag  | tgattgtttt | accaaatttc  | tcaaggcgtg  | aattttttaga | gggtgaagtt |
| 13741 | aattgtttca  | tcaatttttc | atttttcatg  | attactcctc  | actcttcttt  | gtaaccttgc |
| 13801 | cgtcagcatc  | cttagtaact | ttcatagtat  | gaattggaat  | gtatcccatt  | tttttaacga |
| 13861 | tattttcttg  | aacctcgta  | ctaactcatg  | agtctaagaa  | ttgtttgggtg | tagctattag |
| 13921 | gtttcccttt  | agtatacata | tgctcgtagg  | accaaataag  | ccaatcgtta  | gtcgcaacat |
| 13981 | ttttcgcatt  | aggttcaaat | ccatttagtt  | tcaatgtttt  | aactgaatca  | tcaaggtaag |
| 14041 | caaatgatag  | gtatgaaata | gcacctgggtg | tctgagcgac  | aattgactta  | accattccgt |
| 14101 | tagaatcttg  | ctcctgggta | cggattgggtg | atttgccatc  | cataatcaca  | gcatcgaaag |
| 14161 | ttacgcgtgt  | tcctgagcta | gctgctcggg  | taacgatagt  | aatttccaaa  | tcctgtccac |
| 14221 | caagctgttt  | ccagtttgtg | atttttccag  | tgaagatttt  | acgaagttgt  | tctgttgtca |
| 14281 | aattatcaac  | ggatactttc | tgattagtga  | taactgcaat  | acctgcaact  | gcaacttgaa |
| 14341 | agtctacgag  | cttactggca | tcgattccag  | atttttcctc  | agcgaaaaga  | tcactattcc |
| 14401 | caatttcaac  | agcacctgat | tgcaactggg  | aaagtccagt  | accagaaccg  | cccccttgga |
| 14461 | cgttaaccac  | aatttcagga | ttcttttcag  | caaaaccata  | tgatgctgct  | tctactaagg |
| 14521 | gttgaagagc  | cgtagaacca | actgctgtaa  | tggactgacc  | acggtcaatc  | caagaggcac |
| 14581 | aaccagttaa  | gactagcatg | gccattgcca  | gtgataaaat  | cactgcaagg  | ccttttgttt |
| 14641 | ttttcatttc  | tatcctccga | tatgttgtca  | caaaatttaa  | ccaatgcctt  | caatatatac |
| 14701 | tgttaaaaaga | cattaaatta | attataccaa  | gtctaggtta  | attatgtcat  | gttacagttt |
| 14761 | gattacaggc  | ttcaaatatg | gaatcttaaa  | cccttaggat  | agtagttttt  | taaagtattt |
| 14821 | ccaataacct  | tagcaaagcc | aatccatta   | ccatctacca  | aaagttgata  | ccaaccgttt |
| 14881 | tctaacgttt  | ggtcaagtgt | aaccacatta  | ccagaggcat  | actgtgcaaa  | ttgttcttga |
| 14941 | gttaactcta  | tacttgagac | tacttcatcc  | gatgttaaag  | caattccaag  | tgcaaaactt |
| 15001 | ggctcaaaac  | gttttttctt | gaagatgcca  | agatgcaagc  | cattgcgtgc  | gattttaact |
| 15061 | ttggaaagat  | ctggtagtcc | cctaggaagt  | agatagaggt  | tgctgccaaa  | gacttgtagt |
| 15121 | aaaccgtcta  | gaggtagctt | gaggtgtttt  | ttaacaaaat  | catcccagag  | ctgtttttgc |
| 15181 | tccttattga  | ggtttggttt | cccctctttg  | atgcatgact  | gctcaggcat  | gcgcttatcc |
| 15241 | tggaaatttg  | ccacaaactg | accttcccc   | ttgaaatggg  | gtggatacat  | tcgagctggt |
| 15301 | tctggaaaat  | caatcccata | gctcatcccg  | ttcaatttag  | ggattgccac  | caattcaagg |
| 15361 | tcagggtaat  | tctctaaaat | ccaagcaaca  | acaccttcat  | tttcctcagg  | agaccaggta |
| 15421 | catgttgagt  | aaactaattg | tcctcctggg  | gctaacatct  | tcaaaccatc  | tgctaggatg |
| 15481 | tccttctgca  | attgtgccag | ttcactagga  | tagtccttgt  | gccaaactg   | gattgcatca |
| 15541 | gggtccttgc  | gaaacattcc | ttctccagaa  | catggtccat  | caaagacaat  | catatcaaaa |
| 15601 | taatttttaa  | aaactttggc | tagtttatca  | gctgacgtat  | tagtcacaa   | aacattttta |
| 15661 | gcaccaaatc  | gctcaatatt | ctcaactaga  | accttgctac  | gtttgaaatt  | gatttcgttg |
| 15721 | ctgacgagta  | aacctgtgtt | atccagatag  | cttaggagat  | gcgtggattt  | tccgcctggg |
| 15781 | gctgcggcta  | agtctagaac | acggcttcct  | tttgatggag  | ctgccacttg  | agcaaccatt |
| 15841 | tgagcagctg  | gttcttgaga | ataaactaaa  | ccagtcgcgt  | ggtcagaaga  | ttttcctgaa |
| 15901 | attttaccgt  | aatggcccca | aggtgttcca  | ggaataggat  | caggatagtc  | cttctgctgc |
| 15961 | tttttaagag  | ggttaatgcg | gtaggcagac  | acagcttctt  | gatcaaaaga  | tgtaagaat  |
| 16021 | tcctccgctt  | cagcaccaag | taagtcttta  | tatttttcta  | taaaatctga  | tggaaatttc |
| 16081 | atagtttcct  | ttctatcaaa | aaaactggac  | cactcaagag  | aacttgctat  | tctgatttgt |
| 16141 | ccagaatagt  | atatattttt | aaagttaatt  | ttctgagtta  | agaatatctc  | tgatttcttc |
| 16201 | aagtctatct  | ttaggaacaa | gcatcacagc  | ttggcgacta  | gaataatcaa  | gtagctctcc |
| 16261 | agtaatgggt  | tcaagttggg | agcccaattt  | ttttcccata  | atacttgctg  | cagcataatc |
| 16321 | ccatgggtaa  | ataactgaaa | agtaagctaa  | aatttgacca  | gaaaggacct  | tggacatact |
| 16381 | tagaccagca  | ccaccataca | ctcgaacacc  | caaagttttg  | tcaatgaatc  | cttttatacc |
| 16441 | atggtaattt  | ttagcgtaca | tagcagcatt  | actacctact  | agacaacgat  | ccagaggacg |
| 16501 | tctcttatat  | ggtgaaagca | atttatcggt  | gcagtatacg  | tcaaactgac  | ccccaccata |
| 16561 | gaaaagctga  | tcagccataa | cgttgtatat  | taggccaaat  | tttccctgtc  | ccttttcgta |
| 16621 | ataggcaatc  | atgacacaga | aattatcctg  | ttggacgata  | aaattgactg  | tcccatcaat |
| 16681 | aggatccaag  | accagacagt | ttccatcttt  | gatattatga  | accatgttat  | tttcttcagc |
| 16741 | caaaatattg  | tctgttgggg | aagctgattt  | aatgcgtgct  | actagtaaat  | cttgcgtttg |
| 16801 | tttatcaata  | ttagttacta | aatcatcaaa  | agcagacttt  | tcctctaccg  | tgattgtttt |
| 16861 | actcaaactt  | tttttaataa | acgccccagc  | ttccttgatg  | atttcttttag | caaaaacaag |
| 16921 | tttattttcc  | aagtgttaca | aatccttttt  | cttttgcttt  | agcagctctg  | acagcttggg |
| 16981 | agattgaaaa  | accgcttgct | tcttggaagg  | ccttgctctag | ttgcttttca  | ggtgcttttc |
| 17041 | ctggaacaac  | tgttttaaac | gccttataag  | cctccaagag  | ctgatcacgg  | tcaaccttac |
| 17101 | tctcatatgc  | tttttctacc | tgactcaaaa  | aatgaagcac  | tgtggtaatt  | tcctcagtgc |

|       |             |            |             |             |             |             |
|-------|-------------|------------|-------------|-------------|-------------|-------------|
| 17161 | tccatgatgg  | atcgagtg   | taggaataat  | ttcctttagt  | cattattacc  | cttaatttca  |
| 17221 | gcactaatag  | tcgcttgacg | caattcttgc  | tttctatagt  | cacgaggcaa  | aaaggcacga  |
| 17281 | atctcatctt  | cgttaaaacc | gatttgcata  | tgtctgttat  | ccataatgat  | tggtcgacga  |
| 17341 | agaagatttg  | gatattcaga | aatcaattga  | atgagctcct  | caattgtcaa  | attatccaca  |
| 17401 | tcaatattca  | acttctgaaa | gactttagaa  | cgagttgaaa  | tgatatcttc  | agtaccattt  |
| 17461 | tccgtatgag  | acaaaatatt | catcaattca  | tcgtgagtta  | atgggctcgt  | gatgatattg  |
| 17521 | cgttcgtcaa  | aagcaacttc | ataattgatc  | aaccatgctc  | gtgcctttct  | acagctgggtg |
| 17581 | cagctagggtg | atgaaaataa | agttaccatg  | caaacacccc  | tttcacatta  | actttccaaa  |
| 17641 | aatattatac  | attattttct | tagttttggc  | tacgctttct  | taaagttttc  | cgcaattttt  |
| 17701 | tttatccgct  | ttcagttggg | cacatagctc  | gtctatatta  | ttgaatttta  | ttatatcacg  |
| 17761 | gatataatct  | aaccagaaga | cttcgattgt  | ttttccatat  | atatcacctt  | caaaatcaaa  |
| 17821 | gatattggct  | tcaagacgta | actctgtacc  | accaaagtgt  | acgttttttc  | ctagactagt  |
| 17881 | catggaacga  | tagcgcttac | catcaattac  | gacatccgca  | acatagacac  | catctgctgg  |
| 17941 | tagaatagtc  | ctatcgatag | gtgctagatt  | tgctgttggg  | aaaccaatag  | tccgaccacg  |
| 18001 | cgcataccca  | tgtaccacga | tccctcgcgt  | agagaattca  | tgtcctaaga  | gattattggc  |
| 18061 | ctctttcaca  | ttgccttctc | ggattaattg  | acgaacacgc  | gttgatgaaa  | tcttttcgcc  |
| 18121 | accactttgc  | tgttcctcaa | tgacattgaa  | agtaccagaa  | aaattacggt  | ctaaatagtc  |
| 18181 | cgtatcagtg  | cgatgggtgc | cgaatttata  | gtcgaaccca  | actacaatct  | cttgagcttt  |
| 18241 | tagacgggta  | atataacgtg | taatgaagtc  | gtcagaactt  | gttcgagcaa  | aatcactatt  |
| 18301 | aaaatctggt  | aagtaaagtt | gatctgtgcc  | ataggcttta  | aaaagatcac  | aacgtctctg  |
| 18361 | aggtgctgtg  | atatgcagaa | ggagatcatc  | cgatatagcgt | tggaaagtca  | gttgagggct  |
| 18421 | ctcgttaaag  | gtaaggacag | ctacttcaag  | ctgtttttca  | tcagcaatct  | ggcgtgcctt  |
| 18481 | atcaaaaagg  | accttgtgac | cacgatgaag  | agcatcgaaa  | taccctaaga  | ccaagacggt  |
| 18541 | ttccttatcc  | tgatggatat | ctttataatc  | gtttatcggc  | gttactttca  | ttgacttaat  |
| 18601 | actttttctag | gtttatagac | ttgacctcgc  | ttttccataa  | tagctagaac  | tttgtcgccc  |
| 18661 | aaaaaggcag  | caaccaaagg | ctcttggtta  | ttaattgaaa  | taaagcgacc  | aaatgagatt  |
| 18721 | tctttggcat  | catcttcagt | gacttgtacg  | gctggcaggt  | cctgaacgcc  | aaattcaata  |
| 18781 | gggagtagga  | aggactggtc | tcctgcttct  | accatttcag  | aaatttgtga  | cagagttagg  |
| 18841 | gatgaatcta  | atgttaaacc | tgcagaagct  | gttcgacgca  | gagcagacat  | atgactagca  |
| 18901 | aagcctagtt  | ttacacccaa | atcaacagat  | aagggtcgga  | cataagttcc  | tttactacaa  |
| 18961 | gcaacacgga  | aggtgaatct | tgcagtaccg  | ttttctagct  | caatagggtga | ggttcggaca  |
| 19021 | aactcggtaa  | tttttacctg | acgttgagga  | cgttcaactt  | cttctccagc  | tcgggcgtac  |
| 19081 | tcataaagtt  | tctttccggt | gatcttaacc  | gctgaataca  | taggaggaat  | ttgtgtgatt  |
| 19141 | tctccctcaa  | aactagccat | cgctgatcgc  | acagttgctc  | catctagctc  | tgttattgga  |
| 19201 | gttgtttgga  | cgactttctc | actagcatct  | tcggtagttg  | tcgaaaatcc  | aatagtgatt  |
| 19261 | tcgccttcat  | agactttacc | cgcttcagtc  | atgtattcaa  | taacacgagt  | agcttttcca  |
| 19321 | actgctatag  | gtagaacacc | agtaacatct  | ggatcaagag  | ttccgcctgt  | cccaattttt  |
| 19381 | tttctcatgt  | aatattttgc | gtagtttaaa  | aacagcatca  | tgactggtca  | ttccagcctc  |
| 19441 | tttttttttag | attaataatt | cctgaaatca  | tacttttaat  | tatatcaaaa  | gcaatcctaa  |
| 19501 | agagctagggt | agaaacataa | agaggcagag  | aacaacatct  | ctaacctcct  | aacttttata  |
| 19561 | atgagaagaa  | atcacaggac | tacttgttca  | ttttaatcga  | tatctctatt  | tagatcactt  |
| 19621 | tccaattcaa  | agaaagtcta | aatatcttgc  | acatactcta  | agacaccttg  | aaaatcccc   |
| 19681 | tggtcatccc  | tgacagcagc | ataagttaca  | tagacgaatt  | ttcctaaacg  | ttcagacttg  |
| 19741 | aaccacattg  | gaacttggtc | acgttcccc   | cttctgagta  | agttaaagggt | tttcttgacc  |
| 19801 | ttatcaagta  | ctttgggtgg | atgacgaagt  | tcaacatttc  | gtccaatttg  | gcatgtgtgt  |
| 19861 | cgtttaaaaga | ccatctcatc | cgccgggaca  | ttatcattgt  | agtattggaa  | aacatcatct  |
| 19921 | ttattaacaa  | aagtgatttc | caaagggaga  | tgattaagaa  | tgagattagc  | ctgttcaaca  |
| 19981 | gaaaggtaac  | cattaccaaa | tggttgagtg  | gtttctctgt  | ttgcgacaga  | tttatttttt  |
| 20041 | ggttttggcg  | tgaaggatga | agtgaattga  | ccctcaggag  | tgtcgatgat  | tcgagtattt  |
| 20101 | tcggtatttt  | cctcagtcct | tgtcctagac  | tgtttttttt  | tataattgca  | tagccgtagg  |
| 20161 | catcgctttc  | ctcggcaatt | gaaagctaatt | catcctgtgt  | gaagggtttca | agcagaatca  |
| 20221 | taagtaagat  | agcctcttct | tttaagatca  | tagcttcaaa  | ttcttccgaa  | aatgtttcga  |
| 20281 | atgcttttga  | gaattcttca | atatcagcat  | cagagttcga  | aagttcttgg  | agtttagacc  |
| 20341 | ctgcatctca  | aaagagtttt | cggatatcgt  | catctactct  | ccacataacc  | tttggagggtg |
| 20401 | aatcgtgacc  | ataacgctcc | ataatgggaa  | agaaaagctt  | ttctttacgc  | gtataatgat  |
| 20461 | tatggaattg  | cccaagtaaa | gtcatctgat  | gcttaagacc  | gtttaataaa  | tcagatttaa  |
| 20521 | agggctcatt  | ttcagggttt | ctgatgtttt  | ctatgatacg  | acggatacga  | agtatagctg  |
| 20581 | aacgtagggc  | tagattttct | tacttgaaaa  | catagacagg  | atgaccttct  | tgatcagcat  |
| 20641 | ctgctacttc  | gacatctgca | attgctccct  | tgaataagtt  | ggcatggaca  | ttacagagac  |
| 20701 | tcattacatc  | ttcaaaggta | accccatctt  | cagatgccat  | caattcatgc  | tccatcatag  |
| 20761 | atattttcaag | tgcagatact | cccttgaagt  | gttgattgaa  | aagctcttga  | acactttcgg  |



|       |             |            |            |             |             |             |
|-------|-------------|------------|------------|-------------|-------------|-------------|
| 20821 | gactagctcc  | atgatgtaaa | tcaaggagaa | tttctttaag  | tatttgaata  | cgattgtttt  |
| 20881 | ccatattagt  | ctccgatgac | ctcataacca | ttgaacagta  | aggttcactt  | aatttttagat |
| 20941 | aagggaatat  | ttgataactt | agagccagct | tttaaacttg  | ttaccttacc  | gacagtattt  |
| 21001 | agcatagctg  | ggttggacaa | gggcttgaaa | ccaagattaa  | tcagtaattc  | cttgacctct  |
| 21061 | ggatgctctt  | ttatgattgt | tgcaacaggt | tgtgataaat  | ctatagtga   | tgaaaaaaaa  |
| 21121 | gaccaacaaa  | tcttagtttg | ttggctttgt | taattcccaa  | atagggcttc  | tgtaacgttt  |
| 21181 | tgctggatat  | tttcccactc | ctgctctgca | cgaacctct   | tacggtggtg  | atcggcacgc  |
| 21241 | ccacgtaagt  | aggcagcaat | ttgataatct | tgcttaacaa  | tcggtatctc  | aggaatttta  |
| 21301 | atatccaaga  | ggtcagctgt | cgacaaatth | aggacagcct  | tacccttatc  | agcatagtct  |
| 21361 | aaataggcac  | gcccaatctc | agtttcaaga | agaatttga   | tgtagaaaacc | acgaagtttc  |
| 21421 | tctttgggac  | gaagtactgt | tatgtttgat | gaagcgacta  | cttcacgctt  | accttgatct  |
| 21481 | tcgaaaacag  | caactttctg | aaccgttccc | ttagaagcaa  | taaggacatc  | accatcttct  |
| 21541 | aaaagaaagc  | gtaataatth | tcggcgcttc | tcagaaaacg  | tcttttaggtt | atcgtaggca  |
| 21601 | atgccgttgc  | ttgtcatatc | cgataggtta | ataactgcaa  | actctcctgg  | ttctgcctta  |
| 21661 | gcaggaacgg  | cttttccctt | aaattgatcg | acaacatctc  | ctaaacgaac  | gagtttatct  |
| 21721 | gtattagctt  | cgtaatcgat | aattagttga | ggctcttctt  | tttcagacat  | tggtatctct  |
| 21781 | ttttatatct  | tagtatccgt | aataagttta | tctatacaat  | aatagaaga   | agctaatact  |
| 21841 | tttgcaagtg  | aaaactgtaa | taaaggcaaa | aaaagagacc  | taagtctctt  | aattataaac  |
| 21901 | ttttaacagc  | tgccactgct | gcttcatagt | ttggatctga  | attgatattg  | tccaaatact  |
| 21961 | caacataggt  | aatcttggtg | tcagcatctg | taactaaaac  | tgcacgagct  | aacaagtgcc  |
| 22021 | attcttcgat  | aaggacacca | tattcttttc | cgaaactatt  | gtcatagtag  | tcagaaagca  |
| 22081 | tgatagcatt  | ttcaagacct | tcagcaccac | accaacgagc  | ttgtgcaaat  | ggtaggtcca  |
| 22141 | ctgaaatagt  | aattaccact | atatcatcta | gttctgacaa  | ttccttggtt  | aaggtacgtg  |
| 22201 | tttgagttga  | acagatacct | gtatcaatgg | atggaaggat  | agagataact  | tttttcttac  |
| 22261 | cgtcgaattc  | tgaaagtgtt | ttttgactca | aatctgtggc  | tgtcaagtta  | aagtcacgca  |
| 22321 | agatatctcc  | aacttgaagt | tgcttgtctt | cagctactgt  | aactggtttt  | ccaataaatg  |
| 22381 | ttggcatggt  | agtcctccaa | tactttttta | actattgtac  | tgtaaataata | gggacaagcc  |
| 22441 | taatcatttg  | tttagaattt | ttcaaacagt | agtctaattt  | tttcagcaat  | aactgcatta  |
| 22501 | attgcaggaa  | taacctcatc | cgcaaagtta | tttaggtagg  | gataatcacc  | aatttgcact  |
| 22561 | ccatataatg  | catttttgaa | aagagaaata | tcattttgat  | catttccaaa  | agctacaaag  |
| 22621 | tctttaccaa  | agtgggttaa | aacagtacta | gccttgggtc  | cacctttagg  | attaatgtaa  |
| 22681 | agacaccttt  | cgatatcatg | ataactaagg | tctaaacatt  | ccagtttggt  | tagattaaag  |
| 22741 | ataaggctct  | cacgtatatc | ttcatgctct | acaagtggaa  | taacaacttt  | gatgggctca  |
| 22801 | ttaagttcat  | gaataggcaa | aatccttgct | ttgtttaatg  | gatcaacatt  | tgaaagaaaa  |
| 22861 | gggatttact  | cagaattttg | aatagcataa | ttaaagggtat | catcaataaa  | ataagggaga  |
| 22921 | ttataaatat  | cacagtagct | aacaatcggt | cttagagcag  | agaagggtat  | tctgtattgt  |
| 22981 | gatactaagc  | gttcatcttg | aaaaacttca | ccaccgttta  | agctaactac  | tgtcagcttt  |
| 23041 | ctcaattctc  | cttctaaaaa | actaagacag | tctctgtaag  | agcatgctgt  | tataaaaaata |
| 23101 | attttcatgcc | cgtatttttg | tgcaagttaa | agaacctttt  | gtaggtcttt  | tgacatggtc  |
| 23161 | ataccatcaa  | aacatagggt | tccatccaaa | tcaaaaacaa  | atttcatagg  | gatagtataa  |
| 23221 | caaaaaacca  | actaaagagg | gctctataat | ttctgtagtg  | ggtaaaaacta | ctgtagagat  |
| 23281 | tatagagctt  | tttgagtgtg | cacaaaaagt | cccataagaa  | ctataatgaa  | aagcgactaa  |
| 23341 | actaccatta  | ggaagaactt | atgagactta | ttaagaataa  | cacagaatta  | atcggaatca  |
| 23401 | aagaccaaaa  | tatcaagatt | tcacttgttt | ttgaaactga  | cactcatatc  | gagattcaag  |
| 23461 | caaaacttga  | ttaccctgca | ccatctgttc | ctcattgcca  | tggaaagatg  | atcaagtacg  |
| 23521 | actttcaaaa  | gccttctaaa | atccctcttc | tcgagcaagc  | gggaacgcca  | actctactac  |
| 23581 | gtctgaaaaa  | acgtcgtttc | cagtgtaaaa | attgtaggag  | agtaagggtg  | gctgagacat  |
| 23641 | ctatcgttga  | gaaaaactgc | caaactctca | atctagtccg  | acaaaaagtt  | acacaactcc  |
| 23701 | taactgagaa  | agtgtcacta | actgatattg | caagaagact  | tcgcgtgtcg  | acgtccactg  |
| 23761 | tctatcgtaa  | gcttgatcag | tttacttttc | aggaacatta  | tgacaaactc  | cctgctgtta  |
| 23821 | tgctctggga  | tgagtttggg | ttcaagaaag | gggaattgac  | ttttgtggcg  | cagaattatg  |
| 23881 | agacaaacga  | actcataacc | atccttgata | atcgccgcca  | aactactata  | cgaaactact  |
| 23941 | ttttgaagta  | tccattgaaa | gtccgacaac | aggtagactt  | tatcacgatg  | gatagtgtctg |
| 24001 | gagcttatat  | tccactggct | cgcaagttct | ttccaaacgc  | aaaaatcggt  | cttgatcggt  |
| 24061 | tccacatcat  | ccagcacctt | ggacgtgcct | ttttaaaagc  | agaatttgca  | attatgaacc  |
| 24121 | agttcgataa  | gaagtcacta | ccctatcgag | ccctgaaaaa  | tcactggcga  | ctcttccaaa  |
| 24181 | aggacagccg  | taaactatct | ctcaactctt | tttattcaaa  | gactttccgc  | caaacttttag |
| 24241 | caccacatga  | agttgttgcg | aagacactag | tcttttcaaa  | agagcttact  | gactactata  |
| 24301 | cactttatca  | gcttttgctt | tttacttttc | aggagaagag  | agtagatgag  | ttctttgacc  |
| 24361 | tgatagagga  | aaataggagc | aaggtcaatc | gctattttca  | aactgtcttt  | aggacttttc  |
| 24421 | ttagacacaa  | gcaatacatc | aaaaacgcac | tagaaacgga  | ctattcaaac  | gcaaaacttg  |

|       |            |             |             |             |             |             |
|-------|------------|-------------|-------------|-------------|-------------|-------------|
| 24481 | aagcgactaa | taagttgatc  | aaagacatca  | aacgtttggg  | cttcggtttt  | agaaacttta  |
| 24541 | tcaactttaa | gaagcgtgtc  | ttcatcacac  | tgaacataca  | taaaaagagg  | acctatccgg  |
| 24601 | tcctctctag | atgttagctt  | ttcgtcacc   | actacagttg  | acaaagagcc  | ctaaagagct  |
| 24661 | ggctaaatca | ttttgtattg  | aaatacttag  | attttatcaa  | gagctagttt  | taaatcttca  |
| 24721 | atcaaatcat | ctgcgttttc  | caaaccaact  | gagatacgaa  | tttgattttg  | agtacacca   |
| 24781 | caagctagta | aatcagcttc  | tgccaattgt  | tggtgagttg  | ttggtgcagg  | atgcaccacc  |
| 24841 | aaagattttg | catcagcaac  | gtagctaaa   | tctgagaaga  | tttcaagatt  | atctataatg  |
| 24901 | gtacgtgctt | cgtcttgtcc  | acctttaaca  | tggaagtga   | aaatagaacc  | tggtccttta  |
| 24961 | gagaagtatt | tttgtgccaa  | atcatagtaa  | ggacttgatg  | gtaatccagg  | atagttaact  |
| 25021 | ttttcaactt | ttggatgatt  | ttccaaaaag  | tctacgattt  | ttttagtatt  | ttcgacgtgg  |
| 25081 | cgttcgacac | gaagtgaag   | tgtttcaagt  | ccttgcaaga  | gcaagaaagc  | attgaaaggt  |
| 25141 | gccaaggcag | cccctgtgtc  | acgcaaaagt  | tgtgtacgaa  | gggcagttac  | aatgctgct   |
| 25201 | ggaccaacat | cacgcgtata  | gcttatattg  | tggtaaagatg | ggtcctcgtc  | aaccaactgt  |
| 25261 | gggaatttgc | ctgaagcttc  | ccagtcaaat  | ttaccagaat  | cgacgataag  | acctccaata  |
| 25321 | gttgttccat | gtccaccgat  | aaacttagtt  | gcagaatgaa  | ccacgatatc  | tacaccatgg  |
| 25381 | gagataacat | tgatgagata  | tggagttcca  | aaagtattgt  | cagcaacca   | cggaatctta  |
| 25441 | tgactgtgag | caatctcagc  | aattttttca  | aaatcaggaa  | tattgataag  | cggatttccc  |
| 25501 | aaagactcaa | tcaagacaag  | cttgggtatta | tctttgatag  | cagcttcaat  | ttcttcagg   |
| 25561 | ttgtcaacat | ctacaaaagt  | tgttgtgata  | ccatagcgtg  | gaagagtttc  | ttttaagaga  |
| 25621 | ttgaatgtcc | caccatagag  | ggttgttgcg  | gcaacaacat  | gatcgccagc  | atgtgccaaa  |
| 25681 | ccaaggatag | cataggtgat  | tgcagccata  | cctgatgccg  | tagccagggc  | ccaacacca   |
| 25741 | ccttcgaggg | ctgcaatacg  | ttcttcaagt  | actgctactg  | ttggattagt  | aatacgtgtg  |
| 25801 | tagatattac | caggctttct  | aagggcaaag  | agatcttcac  | cttcttgagc  | gtcgtcaaaa  |
| 25861 | acatatgaag | tggtttggta  | aattggaaca  | gcacgtgatt  | ttgtttcctt  | gtcaggtgtt  |
| 25921 | tgtccagcgt | gtaattgtaa  | ggtttcaaat  | gaaaattctc  | gtgacatatg  | agtgtcctcc  |
| 25981 | aaaacaaaag | ttgccttcat  | tctacacct   | gaaaagctag  | ctgtctaata  | gaaatTTTTT  |
| 26041 | atcaatgtga | tagggagggc  | ttataaaaag  | gacctttcgg  | tccttttcta  | tttcttcaca  |
| 26101 | ataggtgcta | cgcttgccaa  | gactttttta  | agtccaactt  | ctggaaattt  | tatcttaagt  |
| 26161 | tcctgtgtct | tgccacttcc  | agttacttct  | aggacggtac  | catctcccca  | tttcttgtgg  |
| 26221 | tgagcgatat | ctccgatttc  | ccaatctgta  | gctgagtttc  | cagagtctga  | agccttacta  |
| 26281 | aaaggtagtc | ccccagtagc  | ttttgaaaat  | ggctgagcgc  | caccagtatg  | tttttgcggc  |
| 26341 | tgtgcatttg | cttttctggt  | ctgaagcgct  | tgttgtaa    | tcattgcctg  | accaaattgt  |
| 26401 | atcggctctt | cctttgtaaa  | acgaacacca  | aatgatgaat  | tggtgggacg  | tgctagacct  |
| 26461 | tgatattgta | ataaatcatc  | tgaaatttca  | cgtaagaaac  | ggctaggacg  | attatagcca  |
| 26521 | gtcttaccaa | aaagcgtacg  | cgtattagcg  | ttggtaagga  | aaagaatctc  | ttccgcacga  |
| 26581 | gtgataccta | cgtaagccaa  | acgacgctct  | tcttcgagtt  | catctggctc  | ttctgaagca  |
| 26641 | cgtgacaaag | ggaagactcc  | ttcttccata  | ccaattagga  | agacaactgg  | gaattcaagc  |
| 26701 | cctttggcgg | cgtggagggg  | cattaagggt  | acttctgctg  | cctcagcctc  | accatcgtcc  |
| 26761 | gtgtcagcaa | tcaaagccaa  | atcattcaag  | aaacggccta  | aacggtcaat  | gcctgtctca  |
| 26821 | tcttcagttc | catctgtatt  | agtctcgtcg  | aaattctttg  | ttacagacat  | gaactcttcg  |
| 26881 | atattttcaa | tgcgtgattg  | gctttcaagc  | gtttgttgca  | tggaacagagc | atccagataa  |
| 26941 | ccagacttgt | ctaaaatagc  | ttctacagta  | tcggtaatgc  | ttagcccatc  | caactgatca  |
| 27001 | cgtaggttca | gaatcatggt  | agcgaatcgc  | taaacacctt  | gagctgcttt  | ccctttaata  |
| 27061 | ggagacaaca | tgatattagc  | tgaagcatct  | aggagactca  | tgttttgctc  | ataggcaag   |
| 27121 | ttccgaagct | tttcaagtgt  | gccaggccca  | actccacgtt  | taggttgcaat | gacgacacgt  |
| 27181 | tcaaaactaa | tggttatcaga | agtgttggca  | atcaagttca  | aataagaaat  | acatcacga   |
| 27241 | atctctttac | ggctgtagaa  | ttttgtccca  | ccaaccattg  | tatatggaat  | attagacttg  |
| 27301 | agcaaggctt | cctcaatggg  | acgagactga  | gcattggtac  | ggtaaagaac  | agcgaagtct  |
| 27361 | ttgaaattct | tgactttttc  | acggacgata  | ttatcgattg  | ttgaagctac  | gaatacagct  |
| 27421 | tcatacgcct | cgtcgttagc  | acggtataaa  | acaatctgtt  | caccttcata  | attttagctc  |
| 27481 | caaagtttct | taggacggcg  | gttgcggttg  | ttcttgatga  | cttcgtagc   | cgcttgaaga  |
| 27541 | attttcttgg | ttgaacggta  | gttttcttcc  | agaaggacaa  | ccttagcttc  | aggataatcc  |
| 27601 | ttctcaaaat | caagaatggt  | ctgcataatc  | gctccacgcc  | atccatagat  | tgattgggtca |
| 27661 | gcatcaccca | cgacacagat  | attcttaaag  | cgtgaagcta  | ggagttttac  | caattgggtat |
| 27721 | tgagcatggg | tggtatcttg  | atactcatct  | acgtgaatgt  | actgataacg  | ttgctgataa  |
| 27781 | taagcgagga | catcgggatt  | tttgtcaaag  | agacgaagag  | tcatacataat | caaatcgctc  |
| 27841 | aatccatgg  | cctcactacg  | acgaagttct  | tcttgatagg  | ccttgtaaca  | tttggctacg  |
| 27901 | atttgcgtat | acatgtcacc  | agcttgatgc  | tcataagcta  | tctcatctaa  | gaggtcatct  |
| 27961 | ttggcgtagg | aaatgggtccc | taaaatggca  | cgttcattcc  | acttttttagg | atctaaattc  |
| 28021 | agattcttga | gaatacgttt  | catcaaagta  | cgttggttctc | ctggatctac  | aatagtaaag  |
| 28081 | tttctgttgt | agccaatatg  | atccgcttca  | cgacgaagga  | ttcgtacaca  | catgctatgg  |

|       |             |             |             |             |             |             |
|-------|-------------|-------------|-------------|-------------|-------------|-------------|
| 28141 | aaggctcgcaa | tcaaggttttc | tgaagttgcg  | ggattttaaag | ccactgcacg  | ttcacgcatt  |
| 28201 | tcacgggcag  | ccttattggt  | aaaggtaatg  | gccaaaatat  | tccaaggatt  | gatcattttt  |
| 28261 | tcgtcgataa  | ggtaggcaat  | gcgatgggta  | aggacacgag  | tcttacctga  | tccagcacca  |
| 28321 | gccataatca  | aaagagggcc  | ttcagtcggt  | tggactgctt  | cggcttggtg  | atcattcata  |
| 28381 | ccagttaata  | atgggttcat  | catattctcc  | attctcaaaa  | ataagctcta  | ctattttatc  |
| 28441 | attttttaga  | tgaaaatgca  | gagtctattc  | gtaatagaaa  | aaaataattg  | agtgaaaaac  |
| 28501 | tgttttgttt  | tgctaggggtc | tcagcttaat  | aaaaaggatg  | acattacgtg  | ctttttgaga  |
| 28561 | gattgaaaac  | tatagataac  | gataaattga  | aagctcaata  | ttcggatttt  | ttacgtatat  |
| 28621 | aataaaaatta | tatgttgaca  | gcgttcggtt  | ttttcgatat  | gatggaaccg  | taataaaaata |
| 28681 | ataaccgagt  | gatgtcatca  | ggatgactgg  | tgattgacgg  | acttctggag  | agatcttgaa  |
| 28741 | acggcttatg  | ctgtagacaa  | gacaccgaag  | gggcaaggga  | taagaccoga  | aactctcagg  |
| 28801 | taaaaggaca  | gaaagcattg  | aaagttttta  | actttcagta  | atagctttgt  | actttcagag  |
| 28861 | gtctggttaa  | gccaaacctc  | tttttgacgt  | ctcgggtctaa | ggagatttta  | aacgcattgtt |
| 28921 | agactttttc  | acttccattg  | atgactttgt  | atggggacct  | ccccttcttg  | tccttcttgt  |
| 28981 | aggaactggg  | atctacctta  | caatccgtct  | tggacttttg  | caaatcattc  | gtctgcctaa  |
| 29041 | agcctttaaa  | cttatctttg  | ctgaagataa  | aggagagggt  | gatatttcta  | gttttgacgc  |
| 29101 | ccttgccaca  | gcacttgctg  | caactattgg  | tactggtaat  | attggtgggtg | ttgcgcacgc  |
| 29161 | cattaagact  | gggtggcctg  | gtgctctttt  | ctggatgtgg  | attgctgctt  | tctttggtat  |
| 29221 | ggcaaccaaa  | tatgctgaag  | gtctcttagc  | cattaaattc  | cgtacgcttg  | atgaccaagg  |
| 29281 | aaatgtctct  | gggtggacca  | tgtattacat  | cacacacggt  | tttagtggaa  | aatggcaaat  |
| 29341 | aatcgctaag  | ccttttagcct | acttcttcgc  | ttttgctggc  | gttcttgtcg  | catggttggg  |
| 29401 | tattggtacc  | ttctcgcaag  | ttaactcaat  | cacatcatct  | cttcaaaaca  | gctttggttg  |
| 29461 | gtcaccaaaa  | attgttagtg  | ttatcttagc  | tcttattact  | gctgctatca  | ttttcggtag  |
| 29521 | tattcaatct  | atttcaaaaag | tatccgaaaa  | agttgtgcca  | tttatggctg  | gtctttacat  |
| 29581 | cattgccgca  | cttattgtca  | tttttgctaa  | tttcaatcag  | ctgctccctg  | tgcttgagat  |
| 29641 | ggttttccaa  | tcagcattta  | ctggtaaagc  | tgctgtcggg  | ggttttgctg  | gagcaactgt  |
| 29701 | catggctgct  | atgcgacttg  | gtattgcgcg  | tggggatttt  | tctaataaat  | caggtcttgg  |
| 29761 | ttctgcccct  | attgctgctg  | ctgctgccaa  | gactgaagag  | cctgttgaac  | aaggtttgat  |
| 29821 | ttctatgaca  | ggtaccttca  | tcgatactat  | tatcatttgt  | acgcttactg  | gacttgctat  |
| 29881 | tctcgtaaat  | ggacaatggg  | ctggtagctt  | agaaggtgca  | ccaatgacac  | aagcggcctt  |
| 29941 | ctcttctatt  | tttggaactt  | ttggagaact  | tgctctaaca  | ctttcttttag | tcttgtttgc  |
| 30001 | ctttacgact  | attctagggt  | ggtcatatta  | tggggaaact  | tgtttcgaat  | ttattttcaa  |
| 30061 | atctaccaaa  | ttcctctcat  | tttatcgtct  | tatcttttga  | gttatggtag  | ctcttggtgg  |
| 30121 | ctacctaaca  | cttgagggtg  | tttggaatat  | tgcggatatc  | gtaaatggct  | tgatggcatt  |
| 30181 | gcctaacttg  | attgccctcc  | tagtcctttc  | accaattatt  | ctcaaagagt  | ctaaatcata  |
| 30241 | ttttgaacgt  | cataaataag  | gaaaagagct  | caggctcttt  | tttcttgctt  | ttaaaggtaa  |
| 30301 | ccaatccttg  | ctactactgc  | tcatttgagt  | tacaatgaaa  | ttaaatcatt  | ttaaacttg   |
| 30361 | taaagaaaaa  | aatccaaagg  | aaaaactatg  | tcaattacca  | agaattcga   | tactatcact  |
| 30421 | gctatctcaa  | ctcccttagg  | tgaaggtgct  | atcggtatcg  | tccgcttgct  | tgggaccgat  |
| 30481 | gctattgcta  | ttgctaataa  | ggttttcaaa  | ggtaaaaaatc | ttgaaaccgt  | tgattctcat  |
| 30541 | actatcaact  | acggccatat  | tgctgaaaaat | aatgaaaatta | ttgatgaagt  | catggtcagt  |
| 30601 | gttatgcgtg  | caccaaaaac  | ctttacacgt  | gaggatgtcg  | tagaaatcaa  | tacacatggg  |
| 30661 | gggtgcgcag  | ttaccaatga  | aatccttcaa  | ctcctgattc  | gttctggtgc  | tcgatggcc   |
| 30721 | gaaccagggg  | aattttacca  | acgtgccttc  | ttaaatggac  | ggatagattt  | gaccaggct   |
| 30781 | caagtgtgca  | tggatttgat  | tcgtgccaaa  | actgataagg  | ctatgactgt  | tgtgtctct   |
| 30841 | gagttagatg  | gttcgcttaa  | aaatctcatt  | aacaacacac  | gccaagaaat  | cttaataact  |
| 30901 | ttggcacaag  | tcgaagtcaa  | tattgattac  | ccagagtatg  | atgatgttga  | agaagttacc  |
| 30961 | acaaatctag  | tccgtgagaa  | aactcaagag  | ttccaggctc  | tcttgaaaaa  | tcttcttgca  |
| 31021 | actgccaaac  | gaggaaaaat  | cctacgagaa  | gggtctttcga | cggcaatcat  | aggccgtcct  |
| 31081 | aatgtcggaa  | agtctagcct  | tctcaacaat  | ctcctacgtg  | aggagaaagc  | catcgtcact  |
| 31141 | gatattgaag  | ggactaccgc  | tgatgttatt  | gaagaatacg  | ttaatatcaa  | gggtgttccct |
| 31201 | cttaagttaa  | tcgataccgc  | tggtattcgt  | gacacagatg  | atgtgggtcg  | aaaaattggg  |
| 31261 | gttgagcgtt  | ctaaaaaagc  | tcttgaagag  | gctgatttgg  | tccttcttgt  | gcttaatagc  |
| 31321 | tctgaaccac  | ttaccgacca  | agaccgtaca  | ctgcttgaca  | tcagccaaaa  | tagcaaccga  |
| 31381 | atcattctct  | taaataagac  | ggaccttcca  | caagctatcc  | agactgaaga  | gcttcttgag  |
| 31441 | gaccttatcc  | caatttcagt  | cctcaaaaat  | gaaaacattg  | acaaaatcga  | agatcgtatc  |
| 31501 | aaccaactct  | tcttttgata  | tgctggctta  | gtagaaaaag  | atgctactta  | tctttcaaat  |
| 31561 | gcacgccata  | tctcactcat  | tgaaaaggcg  | cttgaaaagtc | tcgaagccgt  | taatcaagggt |
| 31621 | cttgaattag  | gtatgcctgt  | tgacctatta  | caagttgata  | tgactcgcac  | atgggaaatt  |
| 31681 | cttggcgaaa  | ttactgggtga | cgccgcaccg  | gatgagctta  | ttactcaact  | ctttagtcag  |
| 31741 | ttctgtctcg  | gtaaaatagac | ataacttaat  | ttatgtaaaa  | agatagattg  | ctatcttttt  |

|       |             |             |            |             |             |             |
|-------|-------------|-------------|------------|-------------|-------------|-------------|
| 31801 | atttttaaatt | aagttatttac | agaaatataa | ttatgttaaa  | aataataaat  | ttataacctta |
| 31861 | aaatgattttt | gccatgctttt | tcgaaaaaga | aaatgctgtc  | atggtactat  | cctatgattt  |
| 31921 | tgaaagggtta | atgatgggcc  | aacaaactac | tgatactgat  | tttaaacatt  | ttatagattt  |
| 31981 | tgatgataat  | cttctttttt  | agactaactg | aaactaaagt  | tgacaatgga  | cgacctgaca  |
| 32041 | ttcttttttca | ttggcaccca  | gaacttgaaa | tctaatacgt  | ctatgaaggg  | actgctcgct  |
| 32101 | atcacattga  | ttatgactat  | tttgatagtc | aggctggaga  | tatcttttcta | attcgtccta  |
| 32161 | atggactcaa  | ttctgtccat  | cctattgcta | atcagtcgca  | ccataactaac | actcttcatt  |
| 32221 | ttcatttaga  | tatgttagga  | caatttctag | tggatcctct  | tagtctccgt  | tatcttcaac  |
| 32281 | ccttacagaa  | ttctaatttt  | aagttcaaac | aatgtttaaa  | accaactgat  | gaggggtatt  |
| 32341 | ctgaaattaa  | gggaacccta  | tttgcaattt | ttaagatcat  | tagacaaaaa  | gagagacact  |
| 32401 | acgggattttt | gcttaagtcc  | aaatcggagg | aactcatcta  | ccttttctac  | tactatcgtt  |
| 32461 | tggtagagag  | aaagacttct  | gatgatcatt | atcgtaaaaa  | tgaaaaaatt  | cgggaaatca  |
| 32521 | ttgatcacat  | caataagcat  | tatgtcgaga | cgcttactat  | tgaacaattg  | tccgagctca  |
| 32581 | tggggtacag  | taagacgcat  | tttatgacca | tatttaaaca  | acatacaggt  | acctcttgca  |
| 32641 | ctgaattttat | tattattcag  | gatagactga | atgctgcttg  | tgaggaactc  | cgtaatagcg  |
| 32701 | taaaaccagt  | tttagaaatt  | tctacgagcg | ttgggttttaa | caacctttca  | aactttaacc  |
| 32761 | gccaattttaa | gcattattat  | gctcaaacac | cgagccagta  | caggaagaca  | catagcaaca  |
| 32821 | agaaaacaaa  | taagagttaa  | ccattgggta | actcttatta  | tttatgcaga  | gaagctattt  |
| 32881 | agttttttctc | tttacctttg  | tgtttgccac | taagtccaaa  | catcgtaagc  | aacatgcca   |
| 32941 | gtccaagaag  | acctgcatgt  | gaagctttat | cccctgttgt  | tggaagttct  | tcggtttggc  |
| 33001 | ttggagtttc  | agtaactttt  | tcagtttcct | taagagtttc  | gtttgaagtt  | taaacgaaga  |
| 33061 | agactttacc  | gttaggtgtt  | gttactactt | tagataccac  | tggtttcggt  | ttttctgaaa  |
| 33121 | cttttagaagc | tacagttgag  | tcaacaggat | ttactggatt  | aaccgttgta  | tcttctgcat  |
| 33181 | tcttttttctt | gttcaaagca  | gcaaatttgg | cacttgaaat  | agaaatttta  | cgatgaattag |
| 33241 | gattaataac  | tgcgtatttc  | gtaagatctg | catgctgcaa  | gtaatcggca  | aagactgtat  |
| 33301 | tgagtgaagg  | accttcttca  | cgaagaccac | caagcattgt  | gaagccatca  | ccaccagcaa  |
| 33361 | gccaagaaat  | cgtttgttac  | tagataataa | ggtgggatcc  | tctagagtcg  | acctgcaggc  |
| 33421 | atgcaagctt  | gagtattcta  | tagtctcacc | taaatagctt  | ggcgtaatca  | tggtcatagc  |
| 33481 | tgtttcctgt  | g           |            |             |             |             |

//
